# Supplementary material for: Gibberellic acid-mediated transcriptional divergence underlies cold stress adaptation in two diploid cotton species
Source: PeerJ journal article supplement (doi:10.7717/peerj.19721), 2025-07-03
Supplement: Supplementary_Table.zip [file Supplementary_Table.zip]

## Sheet: Table S1
Table S1. 136 key genes annotation
#ID	COG_class	COG_class_annotation	GO_annotation	KEGG_annotation	KOG_class	KOG_class_annotation	Swissprot_annotation	nr_annotation	KEGG_pathway_annotation	ThCK12_vs_ThCS12_(FDR_0.01_FC_2)_regulated	ThCK6_vs_ThCS6_(FDR_0.01_FC_2)_regulated	TrCK12_vs_TrCS12_(FDR_0.01_FC_2)_regulated	TrCK6_vs_TrCS6_(FDR_0.01_FC_2)_regulated
Gorai.009G140100	--	--	Molecular Function: endopeptidase activity (GO:0004175);; Molecular Function: inorganic diphosphatase activity (GO:0004427);; Cellular Component: nucleus (GO:0005634);; Cellular Component: integral component of plasma membrane (GO:0005887);; Biological Process: cellular response to phosphate starvation (GO:0016036);; Biological Process: dephosphorylation (GO:0016311);; Biological Process: galacto…	K13248|5.46909e-171|tcc:TCM_029005|Pyridoxal phosphate phosphatase-related protein; K13248 pyridoxal phosphate phosphatase PHOSPHO2 [EC:3.1.3.74] (A)	[R]	General function prediction only	Inorganic pyrophosphatase 1 GN=PS2 OS=Arabidopsis thaliana (Mouse-ear cress) PE=1 SV=1	hypothetical protein F383_35186 [Gossypium arboreum]	Vitamin B6 metabolism (ko00750)	up	up	up	up
Gorai.010G166100	[Q]	Secondary metabolites biosynthesis, transport and catabolism	Molecular Function: C-22 sterol desaturase activity (GO:0000249);; Molecular Function: monooxygenase activity (GO:0004497);; Molecular Function: iron ion binding (GO:0005506);; Cellular Component: extracellular region (GO:0005576);; Molecular Function: electron carrier activity (GO:0009055);; Biological Process: toxin catabolic process (GO:0009407);; Biological Process: response to cyclopentenone…	K09832|0|tcc:TCM_029501|Cytochrome P450, family 710, subfamily A, polypeptide 1; K09832 cytochrome P450, family 710, subfamily A (A)	[QI]	--	Cytochrome P450 710A1 GN=CYP710A1 OS=Arabidopsis thaliana (Mouse-ear cress) PE=1 SV=1	Cytochrome P450, family 710, subfamily A, polypeptide 1 [Theobroma cacao]	Steroid biosynthesis (ko00100)	up	up	up	up
Gorai.008G230100	--	--	Biological Process: maltose biosynthetic process (GO:0000024);; Biological Process: polysaccharide biosynthetic process (GO:0000271);; Molecular Function: sequence-specific DNA binding transcription factor activity (GO:0003700);; Molecular Function: protein serine/threonine kinase activity (GO:0004674);; Molecular Function: ATP binding (GO:0005524);; Cellular Component: nucleus (GO:0005634);; Cel…	K01177|0|tcc:TCM_015812|Chloroplast beta-amylase isoform 1; K01177 beta-amylase [EC:3.2.1.2] (A)	--	--	Beta-amylase 3, chloroplastic (Precursor) OS=Arabidopsis thaliana (Mouse-ear cress) PE=1 SV=3	Beta-amylase 3, chloroplastic -like protein [Gossypium arboreum]	Starch and sucrose metabolism (ko00500)	up	up	up	up
Gorai.011G227200	--	--	Biological Process: tRNA 5'-leader removal (GO:0001682);; Molecular Function: ribonuclease P activity (GO:0004526);; Cellular Component: nucleus (GO:0005634);; Cellular Component: mitochondrion (GO:0005739);; Biological Process: mRNA processing (GO:0006397);; Biological Process: tRNA processing (GO:0008033);; Cellular Component: chloroplast (GO:0009507);; Biological Process: snoRNA processing (GO…	K18213|0|tcc:TCM_017033|Aceous RNase P 1 isoform 2; K18213 proteinaceous RNase P [EC:3.1.26.5] (A)	[R]	General function prediction only	Proteinaceous RNase P 1, chloroplastic/mitochondrial (Precursor) GN=PRORP1 OS=Arabidopsis thaliana (Mouse-ear cress) PE=1 SV=1	hypothetical protein F383_26537 [Gossypium arboreum]	RNA transport (ko03013)	up	up	up	up
Gorai.009G026900	[E]	Amino acid transport and metabolism	Molecular Function: lactoylglutathione lyase activity (GO:0004462);; Cellular Component: mitochondrion (GO:0005739);; Biological Process: carbohydrate metabolic process (GO:0005975);; Biological Process: response to cold (GO:0009409);; Cellular Component: chloroplast stroma (GO:0009570);; Cellular Component: stromule (GO:0010319);; Biological Process: methylglyoxal catabolic process to D-lactate …	K01759|0|tcc:TCM_037825|Glyoxalase/Bleomycin resistance protein/Dioxygenase superfamily protein isoform 1; K01759 lactoylglutathione lyase [EC:4.4.1.5] (A)	[G]	Carbohydrate transport and metabolism	Probable lactoylglutathione lyase, chloroplast (Precursor) GN=At1g67280 OS=Arabidopsis thaliana (Mouse-ear cress) PE=1 SV=1	Glyoxalase/Bleomycin resistance protein/Dioxygenase superfamily protein isoform 1 [Theobroma cacao]	Pyruvate metabolism (ko00620)	up	up	up	up
Gorai.008G291000	--	--	Biological Process: jasmonic acid mediated signaling pathway (GO:0009867);; Biological Process: regulation of defense response (GO:0031347);; Molecular Function: identical protein binding (GO:0042802);; Biological Process: response to other organism (GO:0051707);;	K13464|2.2018e-172|tcc:TCM_012913|Jasmonate-zim-domain protein 3, putative isoform 1; K13464 jasmonate ZIM domain-containing protein (A)	--	--	Protein TIFY 6B GN=MEB5.8 OS=Arabidopsis thaliana (Mouse-ear cress) PE=1 SV=1	Protein TIFY 6B -like protein [Gossypium arboreum]	Plant hormone signal transduction (ko04075)	up	up	up	up
Gorai.008G203900	--	--	Biological Process: polysaccharide biosynthetic process (GO:0000271);; Cellular Component: extracellular region (GO:0005576);; Biological Process: pattern specification process (GO:0007389);; Biological Process: regulation of cell size (GO:0008361);; Biological Process: defense response, incompatible interaction (GO:0009814);; Biological Process: plant-type cell wall modification (GO:0009827);; B…	K01728|0|tcc:TCM_014530|Pectate lyase family protein isoform 3; K01728 pectate lyase [EC:4.2.2.2] (A)	--	--	Probable pectate lyase 5 (Precursor) GN=At1g67750 OS=Arabidopsis thaliana (Mouse-ear cress) PE=2 SV=2	hypothetical protein F383_28754 [Gossypium arboreum]	Pentose and glucuronate interconversions (ko00040)	up	up	up	up
Gorai.009G450300	[G]	Carbohydrate transport and metabolism	Biological Process: polysaccharide biosynthetic process (GO:0000271);; Cellular Component: extracellular region (GO:0005576);; Biological Process: pattern specification process (GO:0007389);; Biological Process: regulation of cell size (GO:0008361);; Biological Process: defense response, incompatible interaction (GO:0009814);; Biological Process: plant-type cell wall modification (GO:0009827);; B…	K01728|0|tcc:TCM_030644|Pectin lyase-like superfamily protein; K01728 pectate lyase [EC:4.2.2.2] (A)	--	--	Probable pectate lyase 18 (Precursor) GN=At4g24780 OS=Arabidopsis thaliana (Mouse-ear cress) PE=2 SV=2	Pectin lyase-like superfamily protein [Theobroma cacao]	Pentose and glucuronate interconversions (ko00040)	up	up	up	up
Gorai.008G138000	--	--	Molecular Function: hydrolase activity, hydrolyzing O-glycosyl compounds (GO:0004553);; Cellular Component: plasma membrane (GO:0005886);; Biological Process: sucrose biosynthetic process (GO:0005986);; Biological Process: galactose metabolic process (GO:0006012);; Biological Process: response to oxidative stress (GO:0006979);; Biological Process: metabolic process (GO:0008152);; Biological Proce…	K06611|0|tcc:TCM_004839|Stachyose synthase; K06611 stachyose synthetase [EC:2.4.1.67] (A)	--	--	Stachyose synthase (Precursor) GN=STS1 OS=Pisum sativum (Garden pea) PE=1 SV=1	Stachyose synthase [Gossypium arboreum]	Galactose metabolism (ko00052)	up	up	up	up
Gorai.013G130900	[M]	Cell wall/membrane/envelope biogenesis	Cellular Component: nucleus (GO:0005634);; Cellular Component: cytoplasm (GO:0005737);; Biological Process: polysaccharide metabolic process (GO:0005976);; Biological Process: galactose metabolic process (GO:0006012);; Biological Process: response to heat (GO:0009408);; Biological Process: response to high light intensity (GO:0009644);; Biological Process: response to salt stress (GO:0009651);; B…	K18819|0|tcc:TCM_026798|Galactinol synthase 2; K18819 inositol 3-alpha-galactosyltransferase [EC:2.4.1.123] (A)	[G]	Carbohydrate transport and metabolism	Galactinol synthase 2 GN=GOLS2 OS=Solanum lycopersicum (Tomato) PE=2 SV=1	Galactinol synthase 2 [Theobroma cacao]	Galactose metabolism (ko00052)	up	up	up	up
Gorai.013G131700	[L]	Replication, recombination and repair	Biological Process: reproduction (GO:0000003);; Molecular Function: magnesium ion binding (GO:0000287);; Molecular Function: DNA binding (GO:0003677);; Cellular Component: nucleoplasm (GO:0005654);; Cellular Component: nucleolus (GO:0005730);; Cellular Component: mitochondrion (GO:0005739);; Biological Process: base-excision repair (GO:0006284);; Molecular Function: 5'-3' exonuclease activity (GO…	K04799|0|pmum:103344521|flap endonuclease 1; K04799 flap endonuclease-1 [EC:3.-.-.-] (A)	[L]	Replication, recombination and repair	Flap endonuclease 1 {ECO:0000255|HAMAP-Rule:MF_03140} OS=Glycine max (Soybean) PE=2 SV=1	Flap endonuclease 1 [Gossypium arboreum]	DNA replication (ko03030);; Base excision repair (ko03410);; Non-homologous end-joining (ko03450)	up	up	up	up
Gorai.009G170800	--	--	Biological Process: response to singlet oxygen (GO:0000304);; Biological Process: response to water deprivation (GO:0009414);; Cellular Component: chloroplast (GO:0009507);; Biological Process: response to wounding (GO:0009611);; Biological Process: response to bacterium (GO:0009617);; Biological Process: response to fungus (GO:0009620);; Biological Process: jasmonic acid biosynthetic process (GO…	K17982|0|tcc:TCM_029932|P(E)-nerolidol/(E,E)-geranyl linalool synthase, putative isoform 1; K17982 geranyllinalool synthase [EC:4.2.3.144] (A)	--	--	(E,E)-geranyllinalool synthase GN=F11P17.15 OS=Arabidopsis thaliana (Mouse-ear cress) PE=1 SV=1	P(E)-nerolidol/(E,E)-geranyl linalool synthase, putative isoform 1 [Theobroma cacao]	Diterpenoid biosynthesis (ko00904)	up	up	up	up
Gorai.008G131800	--	--	Molecular Function: DNA binding (GO:0003677);; Molecular Function: sequence-specific DNA binding transcription factor activity (GO:0003700);; Molecular Function: binding (GO:0005488);; Molecular Function: protein binding (GO:0005515);; Cellular Component: nucleus (GO:0005634);; Biological Process: regulation of transcription, DNA-templated (GO:0006355);; Biological Process: response to salt stres…	K12133|0|tcc:TCM_005021|Homeodomain-like superfamily protein isoform 1; K12133 MYB-related transcription factor LHY (A)	[O]	Posttranslational modification, protein turnover, chaperones	Protein LHY GN=LHY OS=Arabidopsis thaliana (Mouse-ear cress) PE=1 SV=2	Protein LHY -like protein [Gossypium arboreum]	Circadian rhythm - plant (ko04712)	up	up	up	up
Gorai.008G265100	[T]	Signal transduction mechanisms	Biological Process: phosphorelay signal transduction system (GO:0000160);; Molecular Function: sequence-specific DNA binding transcription factor activity (GO:0003700);; Molecular Function: protein binding (GO:0005515);; Cellular Component: nucleus (GO:0005634);; Biological Process: regulation of transcription, DNA-templated (GO:0006355);; Biological Process: response to red or far red light (GO:…	K12130|0|tcc:TCM_015513|Pseudo-response regulator 5, putative isoform 1; K12130 pseudo-response regulator 5 (A)	[K]	Transcription	Two-component response regulator-like APRR5 GN=APRR5 OS=Arabidopsis thaliana (Mouse-ear cress) PE=1 SV=2	Two-component response regulator-like APRR5 [Gossypium arboreum]	Circadian rhythm - plant (ko04712)	up	up	up	up
Gorai.012G001000	[T]	Signal transduction mechanisms	Biological Process: phosphorelay signal transduction system (GO:0000160);; Molecular Function: sequence-specific DNA binding transcription factor activity (GO:0003700);; Molecular Function: protein binding (GO:0005515);; Cellular Component: nucleus (GO:0005634);; Biological Process: regulation of transcription, DNA-templated (GO:0006355);; Biological Process: circadian rhythm (GO:0007623);; Biolo…	K12130|0|tcc:TCM_015513|Pseudo-response regulator 5, putative isoform 1; K12130 pseudo-response regulator 5 (A)	[K]	Transcription	Two-component response regulator-like APRR5 GN=APRR5 OS=Arabidopsis thaliana (Mouse-ear cress) PE=1 SV=2	Two-component response regulator-like APRR5 [Gossypium arboreum]	Circadian rhythm - plant (ko04712)	up	up	up	up
Gorai.009G020500	[Q]	Secondary metabolites biosynthesis, transport and catabolism	Molecular Function: iron ion binding (GO:0005506);; Molecular Function: steroid hydroxylase activity (GO:0008395);; Molecular Function: electron carrier activity (GO:0009055);; Biological Process: response to light stimulus (GO:0009416);; Cellular Component: plasmodesma (GO:0009506);; Biological Process: response to auxin (GO:0009733);; Biological Process: response to brassinosteroid (GO:0009741)…	K15639|0|tcc:TCM_038000|Cytochrome P450; K15639 PHYB activation tagged suppressor 1 [EC:1.14.-.-] (A)	[QI]	--	Cytochrome P450 734A1 GN=F18A8.8 OS=Arabidopsis thaliana (Mouse-ear cress) PE=2 SV=1	hypothetical protein F383_05868 [Gossypium arboreum]	Brassinosteroid biosynthesis (ko00905)	up	up	up	up
Gorai.009G138300	--	--	Molecular Function: iron ion binding (GO:0005506);; Cellular Component: cytoplasm (GO:0005737);; Biological Process: syncytium formation (GO:0006949);; Biological Process: inositol catabolic process (GO:0019310);; Biological Process: L-ascorbic acid biosynthetic process (GO:0019853);; Molecular Function: inositol oxygenase activity (GO:0050113);; Biological Process: oxidation-reduction process (G…	K00469|0|tcc:TCM_028939|Myo-inositol oxygenase 1 isoform 1; K00469 inositol oxygenase [EC:1.13.99.1] (A)	[R]	General function prediction only	Inositol oxygenase 1 OS=Arabidopsis thaliana (Mouse-ear cress) PE=2 SV=1	Inositol oxygenase 1 -like protein [Gossypium arboreum]	Ascorbate and aldarate metabolism (ko00053);; Inositol phosphate metabolism (ko00562)	up	up	up	up
Gorai.008G005100	--	--	Molecular Function: aspartic-type endopeptidase activity (GO:0004190);; Biological Process: proteolysis (GO:0006508);; Biological Process: defense response (GO:0006952);; Biological Process: response to biotic stimulus (GO:0009607);; Molecular Function: hydrolase activity (GO:0016787);; Biological Process: cellular metabolic process (GO:0044237);; Biological Process: regulation of cellular proces…	--	[O]	Posttranslational modification, protein turnover, chaperones	Basic 7S globulin 2 low kDa subunit (Precursor) OS=Glycine max (Soybean) PE=1 SV=1	PREDICTED: basic 7S globulin 2-like [Nelumbo nucifera]	--	up	up	up	up
Gorai.008G069600	--	--	Biological Process: tryptophan catabolic process (GO:0006569);; Biological Process: iron ion transport (GO:0006826);; Biological Process: metabolic process (GO:0008152);; Biological Process: toxin catabolic process (GO:0009407);; Biological Process: response to toxic substance (GO:0009636);; Biological Process: response to salt stress (GO:0009651);; Biological Process: indoleacetic acid biosynthe…	K08237|0|tcc:TCM_000446|Anthocyanidin 3-O-glucosyltransferase 5; K08237 hydroquinone glucosyltransferase [EC:2.4.1.218] (A)	[GC]	--	Anthocyanidin 3-O-glucosyltransferase 5 GN=GT5 OS=Manihot esculenta (Cassava) PE=2 SV=1	Anthocyanidin 3-O-glucosyltransferase 5 [Theobroma cacao]	--	up	up	up	up
Gorai.008G115500	[O]	Posttranslational modification, protein turnover, chaperones	Molecular Function: serine-type endopeptidase activity (GO:0004252);; Biological Process: metabolic process (GO:0008152);; Molecular Function: serine-type peptidase activity (GO:0008236);; Cellular Component: plant-type cell wall (GO:0009505);; Biological Process: response to auxin (GO:0009733);; Cellular Component: external side of plasma membrane (GO:0009897);; Biological Process: lateral root …	--	--	--	Subtilisin-like protease (Precursor) GN=At5g67360 OS=Arabidopsis thaliana (Mouse-ear cress) PE=1 SV=1	Subtilisin-like protease [Gossypium arboreum]	--	up	up	up	up
Gorai.008G140700	--	--	Biological Process: response to stress (GO:0006950);;	--	--	--	--	DnaJ subfamily C member 7 [Gossypium arboreum]	--	up	up	up	up
Gorai.008G156100	--	--	Cellular Component: cell part (GO:0044464);;	--	--	--	Heme-binding-like protein At3g10130, chloroplastic (Precursor) GN=At3g10130 OS=Arabidopsis thaliana (Mouse-ear cress) PE=2 SV=1	PREDICTED: heme-binding protein 2-like [Vitis vinifera]	--	up	up	up	up
Gorai.008G166000	--	--	Molecular Function: DNA binding (GO:0003677);; Molecular Function: sequence-specific DNA binding transcription factor activity (GO:0003700);; Cellular Component: nucleus (GO:0005634);; Cellular Component: mitochondrion (GO:0005739);; Biological Process: regulation of transcription, DNA-templated (GO:0006355);; Cellular Component: chloroplast envelope (GO:0009941);; Biological Process: regulation …	--	--	--	Squamosa promoter-binding-like protein 16 GN=P0702E04.9 OS=Oryza sativa subsp. japonica (Rice) PE=2 SV=1	SQUAMOSA promoter binding-like transcription factor [Gossypium hirsutum]	--	up	up	up	up
Gorai.008G184300	--	--	Biological Process: maltose metabolic process (GO:0000023);; Molecular Function: anion channel activity (GO:0005253);; Cellular Component: nucleus (GO:0005634);; Biological Process: purine nucleobase transport (GO:0006863);; Cellular Component: plant-type vacuole membrane (GO:0009705);; Molecular Function: malate transmembrane transporter activity (GO:0015140);; Biological Process: malate transpo…	--	[R]	General function prediction only	Aluminum-activated malate transporter 9 GN=ALMT9 OS=Arabidopsis thaliana (Mouse-ear cress) PE=2 SV=1	Aluminum-activated malate transporter 9 [Theobroma cacao]	--	up	up	up	up
Gorai.008G215100	[GEPR]	--	Molecular Function: sugar:proton symporter activity (GO:0005351);; Cellular Component: integral component of plasma membrane (GO:0005887);; Biological Process: protein folding (GO:0006457);; Biological Process: purine nucleobase transport (GO:0006863);; Molecular Function: sucrose:proton symporter activity (GO:0008506);; Biological Process: response to heat (GO:0009408);; Biological Process: resp…	--	[R]	General function prediction only	Hexose carrier protein HEX6 GN=HEX6 OS=Ricinus communis (Castor bean) PE=2 SV=1	Major facilitator superfamily protein [Theobroma cacao]	--	up	up	up	up
Gorai.009G006800	--	--	Cellular Component: mitochondrion (GO:0005739);; Cellular Component: chloroplast (GO:0009507);; Biological Process: embryo development ending in seed dormancy (GO:0009793);; Biological Process: sterol metabolic process (GO:0016125);; Biological Process: cytidine to uridine editing (GO:0016554);; Biological Process: isopentenyl diphosphate biosynthetic process, mevalonate pathway (GO:0019287);; Bi…	--	[R]	General function prediction only	Pentatricopeptide repeat-containing protein At5g04780 OS=Arabidopsis thaliana (Mouse-ear cress) PE=2 SV=2	Pentatricopeptide repeat (PPR) superfamily protein, putative [Theobroma cacao]	--	up	up	up	up
Gorai.009G016500	--	--	Cellular Component: extracellular region (GO:0005576);; Cellular Component: plasma membrane (GO:0005886);; Cellular Component: anchored component of membrane (GO:0031225);; Cellular Component: intracellular membrane-bounded organelle (GO:0043231);; Biological Process: cellular metabolic process (GO:0044237);; Biological Process: primary metabolic process (GO:0044238);; Cellular Component: cytopla…	--	--	--	Blue copper protein (Precursor) GN=F5O24.120 OS=Arabidopsis thaliana (Mouse-ear cress) PE=1 SV=2	Blue copper -like protein [Gossypium arboreum]	--	up	up	up	up
Gorai.009G045800	--	--	Biological Process: cell differentiation (GO:0030154);;	--	[S]	Function unknown	Pollen-specific protein SF21 GN=SF21 OS=Helianthus annuus (Common sunflower) PE=2 SV=1	Pollen-specific SF21 [Gossypium arboreum]	--	up	up	up	up
Gorai.009G062400	--	--	Biological Process: response to molecule of bacterial origin (GO:0002237);; Molecular Function: sequence-specific DNA binding transcription factor activity (GO:0003700);; Molecular Function: protein binding (GO:0005515);; Cellular Component: nucleus (GO:0005634);; Biological Process: protein targeting to membrane (GO:0006612);; Biological Process: amino acid transport (GO:0006865);; Biological Pr…	--	--	--	Probable WRKY transcription factor 40 GN=WRKY40 OS=Arabidopsis thaliana (Mouse-ear cress) PE=1 SV=1	WRKY transcription factor 70 [Gossypium hirsutum]	--	up	up	up	up
Gorai.009G103300	[Z]	Cytoskeleton	Biological Process: cell morphogenesis involved in differentiation (GO:0000904);; Biological Process: cytokinesis by cell plate formation (GO:0000911);; Biological Process: regionalization (GO:0003002);; Molecular Function: microtubule motor activity (GO:0003777);; Molecular Function: ATP binding (GO:0005524);; Cellular Component: kinesin complex (GO:0005871);; Cellular Component: microtubule (GO…	K10398|0|tcc:TCM_041959|P-loop containing nucleoside triphosphate hydrolases superfamily protein isoform 1; K10398 kinesin family member 11 (A)	[Z]	Cytoskeleton	125 kDa kinesin-related protein GN=TKRP125 OS=Nicotiana tabacum (Common tobacco) PE=1 SV=1	kinesin-related protein [Gossypium arboreum]	--	up	up	up	up
Gorai.009G152700	--	--	Biological Process: regionalization (GO:0003002);; Molecular Function: DNA binding (GO:0003677);; Molecular Function: protein binding (GO:0005515);; Cellular Component: nucleus (GO:0005634);; Biological Process: regulation of transcription, DNA-templated (GO:0006355);; Biological Process: regulation of translation (GO:0006417);; Biological Process: signal transduction (GO:0007165);; Cellular Comp…	--	--	--	Auxin response factor 6 GN=ARF6 OS=Arabidopsis thaliana (Mouse-ear cress) PE=1 SV=2	Auxin response factor 6 [Gossypium arboreum]	--	up	up	up	up
Gorai.009G162900	--	--	Biological Process: response to reactive oxygen species (GO:0000302);; Cellular Component: chromatin (GO:0000785);; Cellular Component: nucleus (GO:0005634);; Cellular Component: mitochondrion (GO:0005739);; Cellular Component: plasma membrane (GO:0005886);; Biological Process: DNA-dependent DNA replication (GO:0006261);; Biological Process: DNA methylation (GO:0006306);; Biological Process: chro…	--	[P]	Inorganic ion transport and metabolism	Heavy metal-associated isoprenylated plant protein 26 (Precursor) GN=F20M13.140 OS=Arabidopsis thaliana (Mouse-ear cress) PE=1 SV=1	Heavy metal transport/detoxification superfamily protein [Theobroma cacao]	--	up	up	up	up
Gorai.009G178300	--	--	--	--	--	--	--	Uncharacterized protein TCM_030219 [Theobroma cacao]	--	up	up	up	up
Gorai.009G189500	--	--	Molecular Function: actin binding (GO:0003779);; Molecular Function: calcium ion binding (GO:0005509);; Cellular Component: cytosol (GO:0005829);; Cellular Component: plasma membrane (GO:0005886);; Biological Process: response to stress (GO:0006950);; Biological Process: response to desiccation (GO:0009269);; Biological Process: response to water (GO:0009415);; Cellular Component: plasmodesma (GO…	--	--	--	Phosphoprotein ECPP44 GN=ECPP44 OS=Daucus carota (Wild carrot) PE=1 SV=1	Dehydrin ERD10 -like protein [Gossypium arboreum]	--	up	up	up	up
Gorai.009G197600	[R]	General function prediction only	Molecular Function: acid phosphatase activity (GO:0003993);; Molecular Function: protein serine/threonine phosphatase activity (GO:0004722);; Cellular Component: extracellular space (GO:0005615);; Cellular Component: vacuole (GO:0005773);; Cellular Component: cytosol (GO:0005829);; Biological Process: response to osmotic stress (GO:0006970);; Cellular Component: plant-type cell wall (GO:0009505);…	--	[G]	Carbohydrate transport and metabolism	Purple acid phosphatase 2 (Precursor) GN=PAP2 OS=Ipomoea batatas (Sweet potato) PE=1 SV=1	PAP1 [Gossypium hirsutum]	--	up	up	up	up
Gorai.009G237600	[GEPR]	--	Molecular Function: sugar:proton symporter activity (GO:0005351);; Cellular Component: integral component of plasma membrane (GO:0005887);; Biological Process: protein folding (GO:0006457);; Biological Process: purine nucleobase transport (GO:0006863);; Molecular Function: sucrose:proton symporter activity (GO:0008506);; Biological Process: response to heat (GO:0009408);; Biological Process: resp…	--	[R]	General function prediction only	Sugar transport protein 5 GN=STP5 OS=Arabidopsis thaliana (Mouse-ear cress) PE=2 SV=1	Sugar transport 5 -like protein [Gossypium arboreum]	--	up	up	up	up
Gorai.009G252800	--	--	Molecular Function: sequence-specific DNA binding transcription factor activity (GO:0003700);; Cellular Component: nucleus (GO:0005634);; Biological Process: determination of bilateral symmetry (GO:0009855);; Biological Process: polarity specification of adaxial/abaxial axis (GO:0009944);; Biological Process: meristem initiation (GO:0010014);; Biological Process: guard cell differentiation (GO:00…	--	--	--	Dof zinc finger protein DOF1.2 GN=DOF1.2 OS=Arabidopsis thaliana (Mouse-ear cress) PE=2 SV=1	F-box family protein, putative [Theobroma cacao]	--	up	up	up	up
Gorai.009G299100	--	--	--	--	--	--	--	MATH and LRR domain-containing protein PFE0570w, putative isoform 2 [Theobroma cacao]	--	up	up	up	up
Gorai.009G410000	[R]	General function prediction only	Cellular Component: integral component of membrane (GO:0016021);;	--	--	--	--	hypothetical protein F383_22307 [Gossypium arboreum]	--	up	up	up	up
Gorai.009G427800	--	--	Biological Process: tryptophan biosynthetic process (GO:0000162);; Molecular Function: sequence-specific DNA binding transcription factor activity (GO:0003700);; Molecular Function: anthranilate phosphoribosyltransferase activity (GO:0004048);; Molecular Function: signal transducer activity (GO:0004871);; Molecular Function: protein binding (GO:0005515);; Cellular Component: nucleus (GO:0005634);…	--	--	--	Chitin-inducible gibberellin-responsive protein 1 GN=P0006G05.102 OS=Oryza sativa subsp. japonica (Rice) PE=2 SV=1	GRAS family transcription factor isoform 4, partial [Theobroma cacao]	--	up	up	up	up
Gorai.009G453600	[O]	Posttranslational modification, protein turnover, chaperones	Molecular Function: protein binding (GO:0005515);; Cellular Component: endoplasmic reticulum lumen (GO:0005788);; Cellular Component: Golgi apparatus (GO:0005794);; Cellular Component: plasma membrane (GO:0005886);; Biological Process: ER-nucleus signaling pathway (GO:0006984);; Biological Process: response to heat (GO:0009408);; Biological Process: phototropism (GO:0009638);; Biological Process:…	--	[O]	Posttranslational modification, protein turnover, chaperones	Chaperone protein dnaJ 11, chloroplastic (Precursor) GN=T19K4.170 OS=Arabidopsis thaliana (Mouse-ear cress) PE=1 SV=2	Chaperone DnaJ-domain superfamily protein, putative [Theobroma cacao]	--	up	up	up	up
Gorai.010G063200	--	--	--	--	--	--	--	Tetratricopeptide repeat-like superfamily protein, putative [Theobroma cacao]	--	up	up	up	up
Gorai.010G077100	--	--	Molecular Function: ceramide glucosyltransferase activity (GO:0008120);;	--	[IM]	--	--	ceramide glucosyltransferase [Gossypium arboreum]	--	up	up	up	up
Gorai.010G105600	[I]	Lipid transport and metabolism	Biological Process: response to oxidative stress (GO:0006979);; Biological Process: response to metal ion (GO:0010038);; Biological Process: response to chitin (GO:0010200);; Molecular Function: hydrolase activity (GO:0016787);; Cellular Component: cell part (GO:0044464);;	--	[I]	Lipid transport and metabolism	Caffeoylshikimate esterase GN=CSE OS=Arabidopsis thaliana (Mouse-ear cress) PE=1 SV=1	Alpha/beta-Hydrolases superfamily protein [Theobroma cacao]	--	up	up	up	up
Gorai.010G168800	--	--	Biological Process: response to stimulus (GO:0050896);;	--	--	--	Protein PHLOEM PROTEIN 2-LIKE A9 GN=PP2A9 OS=Arabidopsis thaliana (Mouse-ear cress) PE=2 SV=1	protein phloem protein 2-like a9 [Gossypium arboreum]	--	up	up	up	up
Gorai.010G249000	[P]	Inorganic ion transport and metabolism	Biological Process: response to reactive oxygen species (GO:0000302);; Cellular Component: chromatin (GO:0000785);; Molecular Function: protein binding (GO:0005515);; Cellular Component: nucleus (GO:0005634);; Cellular Component: mitochondrion (GO:0005739);; Cellular Component: plasma membrane (GO:0005886);; Biological Process: DNA-dependent DNA replication (GO:0006261);; Biological Process: DNA …	--	[P]	Inorganic ion transport and metabolism	Copper transport protein CCH GN=CCH OS=Arabidopsis thaliana (Mouse-ear cress) PE=1 SV=1	superoxide dismutase 1 copper chaperone [Gossypium arboreum]	--	up	up	up	up
Gorai.011G079400	--	--	Cellular Component: mitochondrion (GO:0005739);; Cellular Component: vacuole (GO:0005773);; Cellular Component: plasma membrane (GO:0005886);; Biological Process: sulfate transport (GO:0008272);; Cellular Component: chloroplast (GO:0009507);; Cellular Component: plant-type vacuole membrane (GO:0009705);; Cellular Component: endomembrane system (GO:0012505);; Molecular Function: molybdate ion tran…	--	--	--	Molybdate transporter 2 GN=F5I6.6 OS=Arabidopsis thaliana (Mouse-ear cress) PE=1 SV=2	Sulfate transmembrane transporters [Theobroma cacao]	--	up	up	up	up
Gorai.011G108000	[P]	Inorganic ion transport and metabolism	Biological Process: respiratory burst involved in defense response (GO:0002679);; Molecular Function: carbonate dehydratase activity (GO:0004089);; Molecular Function: calcium-transporting ATPase activity (GO:0005388);; Molecular Function: calmodulin binding (GO:0005516);; Molecular Function: ATP binding (GO:0005524);; Cellular Component: endoplasmic reticulum membrane (GO:0005789);; Cellular Com…	K01537|0|tcc:TCM_000789|Calcium ATPase 2 isoform 1; K01537 Ca2+-transporting ATPase [EC:3.6.3.8] (A)	[P]	Inorganic ion transport and metabolism	Calcium-transporting ATPase 2, plasma membrane-type GN=ACA2 OS=Arabidopsis thaliana (Mouse-ear cress) PE=1 SV=1	Calcium-transporting ATPase 2, plasma membrane-type -like protein [Gossypium arboreum]	--	up	up	up	up
Gorai.011G152400	--	--	Biological Process: sulfate assimilation (GO:0000103);; Cellular Component: nucleus (GO:0005634);; Cellular Component: cytosol (GO:0005829);; Molecular Function: selenium binding (GO:0008430);; Cellular Component: plasmodesma (GO:0009506);; Cellular Component: chloroplast (GO:0009507);; Biological Process: hormone-mediated signaling pathway (GO:0009755);; Biological Process: polar nucleus fusion …	K17285|0|tcc:TCM_020211|Selenium-binding protein 1 isoform 2; K17285 selenium-binding protein 1 (A)	[P]	Inorganic ion transport and metabolism	Selenium-binding protein 1 GN=SBP1 OS=Arabidopsis thaliana (Mouse-ear cress) PE=1 SV=1	Selenium-binding 2 -like protein [Gossypium arboreum]	--	up	up	up	up
Gorai.011G178900	--	--	Molecular Function: electron carrier activity (GO:0009055);; Biological Process: response to water deprivation (GO:0009414);; Cellular Component: chloroplast thylakoid membrane (GO:0009535);; Biological Process: response to blue light (GO:0009637);; Biological Process: response to high light intensity (GO:0009644);; Biological Process: response to sucrose (GO:0009744);; Biological Process: photos…	--	--	--	Protein PROTON GRADIENT REGULATION 5, chloroplastic (Precursor) GN=PGR5 OS=Arabidopsis thaliana (Mouse-ear cress) PE=1 SV=1	PGR5 [Gossypium arboreum]	--	up	up	up	up
Gorai.011G179700	--	--	Cellular Component: intracellular part (GO:0044424);;	--	[T]	Signal transduction mechanisms	Serine/arginine-rich splicing factor RSZ22A GN=F25P17.11 OS=Arabidopsis thaliana (Mouse-ear cress) PE=1 SV=1	Putative G3BP-like protein [Gossypium arboreum]	--	up	up	up	up
Gorai.011G196200	[S]	Function unknown	Biological Process: cell morphogenesis (GO:0000902);; Cellular Component: cell wall (GO:0005618);; Biological Process: trichoblast differentiation (GO:0010054);; Biological Process: cell growth (GO:0016049);; Molecular Function: hydrolase activity (GO:0016787);; Cellular Component: anchored component of membrane (GO:0031225);; Biological Process: cell development (GO:0048468);; Biological Process…	--	--	--	Leucine-rich repeat extensin-like protein 3 (Precursor) GN=LRX3 OS=Arabidopsis thaliana (Mouse-ear cress) PE=1 SV=1	Uncharacterized protein TCM_021304 [Theobroma cacao]	--	up	up	up	up
Gorai.011G233500	[F]	Nucleotide transport and metabolism	Molecular Function: catalytic activity (GO:0003824);; Biological Process: nucleoside metabolic process (GO:0009116);;	--	--	--	Bark storage protein A (Precursor) GN=BSPA OS=Populus deltoides (Eastern poplar) PE=2 SV=1	Phosphorylase superfamily protein [Theobroma cacao]	--	up	up	up	up
Gorai.011G250800	[R]	General function prediction only	--	--	[R]	General function prediction only	Ankyrin repeat-containing protein At2g01680 GN=At2g01680 OS=Arabidopsis thaliana (Mouse-ear cress) PE=2 SV=1	Ankyrin repeat-containing protein, putative [Theobroma cacao]	--	up	up	up	up
Gorai.011G287700	--	--	Cellular Component: nucleus (GO:0005634);; Biological Process: entrainment of circadian clock (GO:0009649);; Biological Process: regulation of flower development (GO:0009909);; Biological Process: red or far-red light signaling pathway (GO:0010017);; Biological Process: response to red light (GO:0010114);; Biological Process: positive regulation of circadian rhythm (GO:0042753);; Molecular Functi…	--	--	--	Protein EARLY FLOWERING 4 GN=At2g40080 OS=Arabidopsis thaliana (Mouse-ear cress) PE=1 SV=1	Uncharacterized protein TCM_042505 [Theobroma cacao]	--	up	up	up	up
Gorai.012G133000	--	--	--	--	--	--	--	Alkylmercury lyase [Gossypium arboreum]	--	up	up	up	up
Gorai.012G133300	--	--	Molecular Function: sequence-specific DNA binding transcription factor activity (GO:0003700);; Molecular Function: protein binding (GO:0005515);; Cellular Component: intracellular (GO:0005622);; Cellular Component: nucleolus (GO:0005730);; Cellular Component: cytoplasm (GO:0005737);; Biological Process: circadian rhythm (GO:0007623);; Molecular Function: zinc ion binding (GO:0008270);; Biological…	--	--	--	B-box zinc finger protein 32 {ECO:0000303|PubMed:19920209} OS=Arabidopsis thaliana (Mouse-ear cress) PE=1 SV=1	zinc finger family protein [Populus trichocarpa]	--	up	up	up	up
Gorai.012G162000	[S]	Function unknown	Biological Process: polysaccharide biosynthetic process (GO:0000271);; Biological Process: regionalization (GO:0003002);; Molecular Function: protein kinase activity (GO:0004672);; Molecular Function: protein serine/threonine kinase activity (GO:0004674);; Molecular Function: protein binding (GO:0005515);; Molecular Function: ATP binding (GO:0005524);; Cellular Component: plasma membrane (GO:0005…	--	--	--	Receptor-like protein kinase HAIKU2 (Precursor) GN=IKU2 OS=Arabidopsis thaliana (Mouse-ear cress) PE=1 SV=1	Leucine-rich receptor-like protein kinase family protein, XI-23,RLK7, putative [Theobroma cacao]	--	up	up	up	up
Gorai.012G172100	--	--	Molecular Function: polygalacturonase activity (GO:0004650);; Molecular Function: protein binding (GO:0005515);; Cellular Component: extracellular region (GO:0005576);; Biological Process: carbohydrate metabolic process (GO:0005975);; Cellular Component: plant-type cell wall (GO:0009505);; Biological Process: anther dehiscence (GO:0009901);; Biological Process: fruit dehiscence (GO:0010047);; Bio…	--	--	--	Polygalacturonase At1g48100 (Precursor) GN=At1g48100 OS=Arabidopsis thaliana (Mouse-ear cress) PE=2 SV=1	hypothetical protein F383_10630 [Gossypium arboreum]	--	up	up	up	up
Gorai.013G001500	[G]	Carbohydrate transport and metabolism	Molecular Function: hydrolase activity, hydrolyzing O-glycosyl compounds (GO:0004553);; Biological Process: carbohydrate metabolic process (GO:0005975);; Biological Process: polysaccharide metabolic process (GO:0005976);; Molecular Function: carbohydrate binding (GO:0030246);; Molecular Function: maltose alpha-glucosidase activity (GO:0032450);; Biological Process: cellular macromolecule metaboli…	--	[G]	Carbohydrate transport and metabolism	Putative alpha-xylosidase 2 (Precursor) GN=XYL2 OS=Arabidopsis thaliana (Mouse-ear cress) PE=5 SV=1	Glycosyl hydrolases family 31 protein isoform 1 [Theobroma cacao]	--	up	up	up	up
Gorai.013G006900	--	--	--	--	--	--	--	Uncharacterized protein TCM_045517 [Theobroma cacao]	--	up	up	up	up
Gorai.013G050500	--	--	--	--	--	--	--	Uncharacterized protein TCM_007226 [Theobroma cacao]	--	up	up	up	up
Gorai.013G146100	[GEPR]	--	Molecular Function: sugar:proton symporter activity (GO:0005351);; Cellular Component: plant-type vacuole membrane (GO:0009705);; Molecular Function: carbohydrate transmembrane transporter activity (GO:0015144);; Molecular Function: solute:proton symporter activity (GO:0015295);; Biological Process: nitrate transport (GO:0015706);; Cellular Component: integral component of membrane (GO:0016021);;…	--	[R]	General function prediction only	Organic cation/carnitine transporter 3 GN=F3O9.19 OS=Arabidopsis thaliana (Mouse-ear cress) PE=2 SV=1	Organic cation/carnitine transporter 3 [Theobroma cacao]	--	up	up	up	up
Gorai.013G173000	[M]	Cell wall/membrane/envelope biogenesis	Molecular Function: nucleic acid binding (GO:0003676);; Biological Process: macromolecule metabolic process (GO:0043170);; Biological Process: primary metabolic process (GO:0044238);;	--	--	--	Protein TIC 214 {ECO:0000250|UniProtKB:P56785} OS=Oenothera elata subsp. hookeri (Hooker&apos;s evening primrose) PE=3 SV=3	gpmI [Gossypium arboreum]	--	up	up	up	up
Gorai.013G195300	--	--	--	--	--	--	Dehydrin DHN1 GN=DHN1 OS=Zea mays (Maize) PE=1 SV=2	hypothetical protein F383_34022 [Gossypium arboreum]	--	up	up	up	up
Gorai.N002300	--	--	--	--	--	--	--	hypothetical protein F383_25017 [Gossypium arboreum]	--	up	up	up	up
Gossypium_raimondii_newGene_1003	--	--	--	--	--	--	--	hypothetical protein F383_26668 [Gossypium arboreum]	--	up	up	up	up
Gorai.001G239200	[G]	Carbohydrate transport and metabolism	Biological Process: response to hypoxia (GO:0001666);; Molecular Function: protein binding (GO:0005515);; Cellular Component: vacuolar membrane (GO:0005774);; Cellular Component: Golgi apparatus (GO:0005794);; Cellular Component: plasma membrane (GO:0005886);; Molecular Function: starch synthase activity (GO:0009011);; Biological Process: glucan biosynthetic process (GO:0009250);; Cellular Compon…	K00703|0|tcc:TCM_018569|Starch synthase 2; K00703 starch synthase [EC:2.4.1.21] (A)	--	--	Granule-bound starch synthase 2, chloroplastic/amyloplastic (Precursor) GN=SS2 OS=Solanum tuberosum (Potato) PE=1 SV=3	Granule-bound starch synthase 2, chloroplastic/amyloplastic [Gossypium arboreum]	Starch and sucrose metabolism (ko00500)	down	down	down	down
Gorai.003G038300	[G]	Carbohydrate transport and metabolism	Biological Process: transition metal ion transport (GO:0000041);; Molecular Function: trehalose-phosphatase activity (GO:0004805);; Cellular Component: nucleus (GO:0005634);; Biological Process: trehalose biosynthetic process (GO:0005992);; Biological Process: response to cold (GO:0009409);; Cellular Component: chloroplast (GO:0009507);; Biological Process: response to salt stress (GO:0009651);; …	K01087|0|tcc:TCM_001144|Haloacid dehalogenase-like hydrolase (HAD) superfamily protein; K01087 trehalose 6-phosphate phosphatase [EC:3.1.3.12] (A)	[G]	Carbohydrate transport and metabolism	Probable trehalose-phosphate phosphatase J GN=TPPJ OS=Arabidopsis thaliana (Mouse-ear cress) PE=1 SV=1	Trehalose-phosphate phosphatase [Gossypium arboreum]	Starch and sucrose metabolism (ko00500)	down	down	down	down
Gorai.005G045800	[P]	Inorganic ion transport and metabolism	Biological Process: maltose metabolic process (GO:0000023);; Biological Process: sulfate assimilation (GO:0000103);; Biological Process: selenium compound metabolic process (GO:0001887);; Molecular Function: sulfate adenylyltransferase (ATP) activity (GO:0004781);; Cellular Component: mitochondrion (GO:0005739);; Cellular Component: cytosol (GO:0005829);; Cellular Component: plasma membrane (GO:0…	K13811|0|tcc:TCM_020727|Pseudouridine synthase/archaeosine transglycosylase-like family protein; K13811 3'-phosphoadenosine 5'-phosphosulfate synthase [EC:2.7.7.4 2.7.1.25] (A)	[P]	Inorganic ion transport and metabolism	ATP sulfurylase 1, chloroplastic (Precursor) GN=APS1 OS=Arabidopsis thaliana (Mouse-ear cress) PE=1 SV=1	ATP sulfurylase 1, chloroplastic -like protein [Gossypium arboreum]	Purine metabolism (ko00230);; Selenocompound metabolism (ko00450);; Sulfur metabolism (ko00920)	down	down	down	down
Gorai.003G048900	[F]	Nucleotide transport and metabolism	Molecular Function: 3'-5'-exoribonuclease activity (GO:0000175);; Molecular Function: RNA binding (GO:0003723);; Molecular Function: ribonucleoside-diphosphate reductase activity, thioredoxin disulfide as acceptor (GO:0004748);; Molecular Function: ATP binding (GO:0005524);; Cellular Component: mitochondrion (GO:0005739);; Cellular Component: ribonucleoside-diphosphate reductase complex (GO:00059…	K10807|0|tcc:TCM_001302|Ribonucleotide reductase 1 isoform 1; K10807 ribonucleoside-diphosphate reductase subunit M1 [EC:1.17.4.1] (A)	[F]	Nucleotide transport and metabolism	Ribonucleoside-diphosphate reductase large subunit {ECO:0000303|PubMed:10542051} OS=Arabidopsis thaliana (Mouse-ear cress) PE=1 SV=1	Ribonucleoside-diphosphate reductase large subunit -like protein [Gossypium arboreum]	Purine metabolism (ko00230);; Pyrimidine metabolism (ko00240);; Glutathione metabolism (ko00480)	down	down	down	down
Gorai.001G244000	[F]	Nucleotide transport and metabolism	Molecular Function: amidophosphoribosyltransferase activity (GO:0004044);; Cellular Component: cell wall (GO:0005618);; Cellular Component: cytosol (GO:0005829);; Biological Process: 'de novo' IMP biosynthetic process (GO:0006189);; Biological Process: glutamine metabolic process (GO:0006541);; Biological Process: purine nucleobase biosynthetic process (GO:0009113);; Biological Process: nucleosid…	K00764|0|tcc:TCM_006764|GLN phosphoribosyl pyrophosphate amidotransferase 1; K00764 amidophosphoribosyltransferase [EC:2.4.2.14] (A)	[F]	Nucleotide transport and metabolism	Amidophosphoribosyltransferase 1, chloroplastic (Precursor) GN=F1P15 OS=Arabidopsis thaliana (Mouse-ear cress) PE=2 SV=1	GLN phosphoribosyl pyrophosphate amidotransferase 1 [Theobroma cacao]	Purine metabolism (ko00230);; Alanine, aspartate and glutamate metabolism (ko00250)	down	down	down	down
Gorai.004G217500	--	--	Cellular Component: vacuole (GO:0005773);; Biological Process: cellular aromatic compound metabolic process (GO:0006725);; Biological Process: defense response (GO:0006952);; Biological Process: signal transduction (GO:0007165);; Cellular Component: plastid (GO:0009536);; Biological Process: chlorophyll catabolic process (GO:0015996);; Molecular Function: hydrolase activity (GO:0016787);; Biologi…	K08099|2.26112e-93|vvi:100243499|chlorophyllase-1; K08099 chlorophyllase [EC:3.1.1.14] (A)	--	--	Chlorophyllase-1, chloroplastic (Precursor) OS=Citrus unshiu (Satsuma mandarin) PE=2 SV=1	chlorophyllase 1 [Pachira macrocarpa]	Porphyrin and chlorophyll metabolism (ko00860)	down	down	down	down
Gorai.001G043900	--	--	Biological Process: gravitropism (GO:0009630);; Biological Process: response to auxin (GO:0009733);; Biological Process: somatic embryogenesis (GO:0010262);; Biological Process: gene expression (GO:0010467);; Biological Process: response to organic cyclic compound (GO:0014070);; Biological Process: cellular macromolecule biosynthetic process (GO:0034645);; Biological Process: primary metabolic pr…	K14484|4.29181e-79|tcc:TCM_038129|AUX/IAA transcriptional regulator family protein, putative isoform 1; K14484 auxin-responsive protein IAA (A)	--	--	Auxin-responsive protein IAA29 GN=IAA29 OS=Arabidopsis thaliana (Mouse-ear cress) PE=2 SV=2	auxin-responsive IAA29-like protein [Gossypium hirsutum]	Plant hormone signal transduction (ko04075)	down	down	down	down
Gorai.003G008600	[G]	Carbohydrate transport and metabolism	Molecular Function: alpha-mannosidase activity (GO:0004559);; Biological Process: mannose metabolic process (GO:0006013);; Molecular Function: zinc ion binding (GO:0008270);; Molecular Function: carbohydrate binding (GO:0030246);;	K01191|0|tcc:TCM_000183|Fatty acid hydroxylase superfamily isoform 2; K01191 alpha-mannosidase [EC:3.2.1.24] (A)	[G]	Carbohydrate transport and metabolism	Alpha-mannosidase, light subunit {ECO:0000303|PubMed:24221485} OS=Canavalia ensiformis (Jack bean) PE=1 SV=1	Lysosomal alpha-mannosidase [Gossypium arboreum]	Other glycan degradation (ko00511)	down	down	down	down
Gorai.001G264100	[P]	Inorganic ion transport and metabolism	Cellular Component: plasma membrane (GO:0005886);; Cellular Component: chloroplast (GO:0009507);; Cellular Component: plant-type vacuole membrane (GO:0009705);; Molecular Function: nitrate transmembrane transporter activity (GO:0015112);; Biological Process: nitrate transport (GO:0015706);; Cellular Component: integral component of membrane (GO:0016021);; Biological Process: lateral root developm…	K02575|0|cic:CICLE_v10015129mg|hypothetical protein; K02575 MFS transporter, NNP family, nitrate/nitrite transporter (A)	--	--	High affinity nitrate transporter 2.7 GN=NRT2.7 OS=Arabidopsis thaliana (Mouse-ear cress) PE=2 SV=1	High affinity nitrate transporter 2.7 -like protein [Gossypium arboreum]	Nitrogen metabolism (ko00910)	down	down	down	down
Gorai.005G091600	[R]	General function prediction only	Molecular Function: iron ion binding (GO:0005506);; Cellular Component: mitochondrion (GO:0005739);; Cellular Component: vacuole (GO:0005773);; Cellular Component: cytosol (GO:0005829);; Cellular Component: plasma membrane (GO:0005886);; Biological Process: nitric oxide biosynthetic process (GO:0006809);; Molecular Function: electron carrier activity (GO:0009055);; Biological Process: response to…	K10534|0|tcc:TCM_035019|Nitrate reductase 2; K10534 nitrate reductase (NAD(P)H) [EC:1.7.1.1 1.7.1.2 1.7.1.3] (A)	[C]	Energy production and conversion	Nitrate reductase [NADH] OS=Cucurbita maxima (Pumpkin) PE=2 SV=1	Nitrate reductase 2 [Theobroma cacao]	Nitrogen metabolism (ko00910)	down	down	down	down
Gorai.004G235400	[M]	Cell wall/membrane/envelope biogenesis	Cellular Component: nucleus (GO:0005634);; Biological Process: galactose metabolic process (GO:0006012);; Biological Process: response to oxidative stress (GO:0006979);; Biological Process: response to heat (GO:0009408);; Biological Process: response to cold (GO:0009409);; Biological Process: response to water deprivation (GO:0009414);; Biological Process: response to high light intensity (GO:000…	K18819|0|tcc:TCM_026798|Galactinol synthase 2; K18819 inositol 3-alpha-galactosyltransferase [EC:2.4.1.123] (A)	[G]	Carbohydrate transport and metabolism	Galactinol synthase 2 GN=GOLS2 OS=Arabidopsis thaliana (Mouse-ear cress) PE=1 SV=1	Glycogenin-1 [Gossypium arboreum]	Galactose metabolism (ko00052)	down	down	down	down
Gorai.001G242000	--	--	Molecular Function: iron ion binding (GO:0005506);; Cellular Component: nucleus (GO:0005634);; Cellular Component: chloroplast (GO:0009507);; Biological Process: secondary shoot formation (GO:0010223);; Molecular Function: cis-trans isomerase activity (GO:0016859);; Biological Process: strigolactone biosynthetic process (GO:1901601);;	K17911|1.36112e-147|tcc:TCM_004236|DWARF27, putative isoform 1; K17911 beta-carotene isomerase [EC:5.2.1.14] (A)	--	--	Beta-carotene isomerase D27, chloroplastic (Precursor) GN=D27 OS=Oryza sativa subsp. japonica (Rice) PE=1 SV=1	DWARF27, putative isoform 1 [Theobroma cacao]	Carotenoid biosynthesis (ko00906)	down	down	down	down
Gorai.002G203500	[R]	General function prediction only	Biological Process: polysaccharide catabolic process (GO:0000272);; Cellular Component: extracellular region (GO:0005576);; Cellular Component: vacuole (GO:0005773);; Cellular Component: plasma membrane (GO:0005886);; Biological Process: chitin catabolic process (GO:0006032);; Molecular Function: chitin binding (GO:0008061);; Molecular Function: endochitinase activity (GO:0008843);; Biological Pr…	K01183|8.61285e-178|tcc:TCM_006498|Basic chitinase; K01183 chitinase [EC:3.2.1.14] (A)	[R]	General function prediction only	Endochitinase 1 (Precursor) OS=Gossypium hirsutum (Upland cotton) PE=3 SV=1	Endochitinase 1 [Gossypium arboreum]	Amino sugar and nucleotide sugar metabolism (ko00520)	down	down	down	down
Gorai.001G009800	--	--	Cellular Component: plant-type cell wall (GO:0009505);;	--	--	--	--	hypothetical protein F383_08453 [Gossypium arboreum]	--	down	down	down	down
Gorai.001G012000	--	--	Biological Process: RNA splicing, via endonucleolytic cleavage and ligation (GO:0000394);; Molecular Function: protein serine/threonine kinase activity (GO:0004674);; Molecular Function: protein binding (GO:0005515);; Cellular Component: plasma membrane (GO:0005886);; Biological Process: methionine biosynthetic process (GO:0009086);; Biological Process: defense response to bacterium, incompatible…	--	[T]	Signal transduction mechanisms	Receptor-like serine/threonine-protein kinase ALE2 (Precursor) GN=ALE2 OS=Arabidopsis thaliana (Mouse-ear cress) PE=1 SV=1	Serine/threonine-protein kinase PBS1 isoform 4 [Theobroma cacao]	--	down	down	down	down
Gorai.001G019300	--	--	--	--	--	--	--	Arginine--tRNA ligase [Gossypium arboreum]	--	down	down	down	down
Gorai.001G026400	--	--	--	--	--	--	Lachrymatory-factor synthase (Precursor) GN=LFS OS=Allium cepa (Onion) PE=1 SV=1	Polyketide cyclase/dehydrase and lipid transport superfamily protein, putative [Theobroma cacao]	--	down	down	down	down
Gorai.001G037700	--	--	Biological Process: response to molecule of bacterial origin (GO:0002237);; Molecular Function: sequence-specific DNA binding transcription factor activity (GO:0003700);; Molecular Function: protein binding (GO:0005515);; Cellular Component: nucleus (GO:0005634);; Biological Process: ion transport (GO:0006811);; Biological Process: defense response (GO:0006952);; Biological Process: response to o…	--	--	--	WRKY transcription factor 18 GN=WRKY18 OS=Arabidopsis thaliana (Mouse-ear cress) PE=1 SV=2	WRKY transcription factor 51 [Gossypium hirsutum]	--	down	down	down	down
Gorai.001G037800	--	--	Biological Process: transition metal ion transport (GO:0000041);; Biological Process: MAPK cascade (GO:0000165);; Biological Process: response to molecule of bacterial origin (GO:0002237);; Biological Process: respiratory burst involved in defense response (GO:0002679);; Molecular Function: sequence-specific DNA binding transcription factor activity (GO:0003700);; Molecular Function: protein bind…	--	--	--	WRKY transcription factor 18 GN=WRKY18 OS=Arabidopsis thaliana (Mouse-ear cress) PE=1 SV=2	WRKY52 [Gossypium aridum]	--	down	down	down	down
Gorai.001G067500	--	--	Cellular Component: cytoplasm (GO:0005737);; Biological Process: tryptophan catabolic process (GO:0006569);; Molecular Function: sulfotransferase activity (GO:0008146);; Biological Process: response to water deprivation (GO:0009414);; Biological Process: indoleacetic acid biosynthetic process (GO:0009684);; Biological Process: jasmonic acid biosynthetic process (GO:0009695);; Biological Process: …	--	[R]	General function prediction only	Cytosolic sulfotransferase 16 GN=F2P9.3 OS=Arabidopsis thaliana (Mouse-ear cress) PE=1 SV=1	hypothetical protein CICLE_v10023927mg [Citrus clementina]	--	down	down	down	down
Gorai.001G120200	--	--	Biological Process: cellular aromatic compound metabolic process (GO:0006725);; Biological Process: defense response (GO:0006952);; Biological Process: cell communication (GO:0007154);; Biological Process: response to organic substance (GO:0010033);; Biological Process: carboxylic acid metabolic process (GO:0019752);; Cellular Component: intracellular membrane-bounded organelle (GO:0043231);; Cel…	--	--	--	Protein LURP-one-related 8 GN=At2g38640 OS=Arabidopsis thaliana (Mouse-ear cress) PE=2 SV=1	hypothetical protein F383_28888 [Gossypium arboreum]	--	down	down	down	down
Gorai.002G073800	--	--	Biological Process: MAPK cascade (GO:0000165);; Biological Process: response to hypoxia (GO:0001666);; Molecular Function: DNA binding (GO:0003677);; Molecular Function: sequence-specific DNA binding transcription factor activity (GO:0003700);; Cellular Component: nucleus (GO:0005634);; Biological Process: transcription, DNA-templated (GO:0006351);; Biological Process: regulation of transcription…	--	--	--	NAC domain-containing protein 18 GN=F14G24.15 OS=Arabidopsis thaliana (Mouse-ear cress) PE=2 SV=1	NAC domain protein NAC53 [Gossypium hirsutum]	--	down	down	down	down
Gorai.002G087700	--	--	Biological Process: unsaturated fatty acid biosynthetic process (GO:0006636);; Cellular Component: chloroplast (GO:0009507);; Biological Process: phosphatidylglycerol metabolic process (GO:0046471);; Molecular Function: delta 3-trans-hexadecenoic acid phosphatidylglycerol desaturase activity (GO:0052637);; Biological Process: response to karrikin (GO:0080167);;	K10704|0|tcc:TCM_030950|Fatty acid desaturase A; K10704 ubiquitin-conjugating enzyme E2 variant (A)	[O]	Posttranslational modification, protein turnover, chaperones	Fatty acid desaturase 4, chloroplastic (Precursor) GN=F10M23.370 OS=Arabidopsis thaliana (Mouse-ear cress) PE=2 SV=1	Fatty acid desaturase A [Theobroma cacao]	--	down	down	down	down
Gorai.002G095100	[R]	General function prediction only	Molecular Function: calmodulin binding (GO:0005516);; Cellular Component: nucleus (GO:0005634);; Biological Process: iron ion transport (GO:0006826);; Biological Process: abscisic acid-activated signaling pathway (GO:0009738);; Biological Process: blue light signaling pathway (GO:0009785);; Biological Process: cellular response to iron ion starvation (GO:0010106);; Biological Process: response to…	K06911|0|tcc:TCM_030751|RmlC-like cupins superfamily protein; K06911 (A)	--	--	Pirin-like protein At1g50590 GN=At1g50590 OS=Arabidopsis thaliana (Mouse-ear cress) PE=2 SV=1	hypothetical protein F383_12320 [Gossypium arboreum]	--	down	down	down	down
Gorai.002G119600	--	--	Molecular Function: calcium ion binding (GO:0005509);; Cellular Component: Golgi apparatus (GO:0005794);; Cellular Component: cytosol (GO:0005829);; Cellular Component: plasma membrane (GO:0005886);; Biological Process: response to desiccation (GO:0009269);; Biological Process: response to cold (GO:0009409);; Cellular Component: chloroplast (GO:0009507);; Biological Process: response to salt stre…	--	--	--	Phosphoprotein ECPP44 GN=ECPP44 OS=Daucus carota (Wild carrot) PE=1 SV=1	Phosphoprotein ECPP44 [Gossypium arboreum]	--	down	down	down	down
Gorai.002G120200	[E]	Amino acid transport and metabolism	Molecular Function: serine-type endopeptidase activity (GO:0004252);; Biological Process: proteolysis (GO:0006508);; Cellular Component: chloroplast (GO:0009507);; Molecular Function: serine-type exopeptidase activity (GO:0070008);;	K01322|0|tcc:TCM_046888|Prolyl oligopeptidase family protein; K01322 prolyl oligopeptidase [EC:3.4.21.26] (A)	[O]	Posttranslational modification, protein turnover, chaperones	--	Prolyl endopeptidase [Gossypium arboreum]	--	down	down	down	down
Gorai.002G184700	--	--	Cellular Component: ubiquitin ligase complex (GO:0000151);; Molecular Function: ubiquitin-protein transferase activity (GO:0004842);; Cellular Component: nucleus (GO:0005634);; Cellular Component: cytoplasm (GO:0005737);; Biological Process: signal transduction (GO:0007165);; Biological Process: response to abiotic stimulus (GO:0009628);; Biological Process: defense response, incompatible interac…	--	[S]	Function unknown	U-box domain-containing protein 6 GN=PUB6 OS=Arabidopsis thaliana (Mouse-ear cress) PE=2 SV=2	U-box domain-containing protein 6 [Gossypium arboreum]	--	down	down	down	down
Gorai.002G219600	[P]	Inorganic ion transport and metabolism	Cellular Component: chromatin (GO:0000785);; Molecular Function: protein binding (GO:0005515);; Cellular Component: nucleus (GO:0005634);; Cellular Component: plasma membrane (GO:0005886);; Biological Process: DNA metabolic process (GO:0006259);; Biological Process: regulation of transcription, DNA-templated (GO:0006355);; Cellular Component: plasmodesma (GO:0009506);; Cellular Component: chlorop…	--	[P]	Inorganic ion transport and metabolism	Heavy metal-associated isoprenylated plant protein 26 (Precursor) GN=F20M13.140 OS=Arabidopsis thaliana (Mouse-ear cress) PE=1 SV=1	Superoxide dismutase 1 copper chaperone [Gossypium arboreum]	--	down	down	down	down
Gorai.002G251500	--	--	Molecular Function: sequence-specific DNA binding RNA polymerase II transcription factor activity (GO:0000981);; Molecular Function: DNA binding (GO:0003677);; Cellular Component: nucleolus (GO:0005730);; Biological Process: regulation of glycolytic process (GO:0006110);; Biological Process: regulation of transcription, DNA-templated (GO:0006355);; Biological Process: metabolic process (GO:000815…	K09284|0|tcc:TCM_022077|AP2.7 isoform 1; K09284 AP2-like factor, euAP2 lineage (A)	--	--	Ethylene-responsive transcription factor RAP2-7 GN=T17D12.11 OS=Arabidopsis thaliana (Mouse-ear cress) PE=2 SV=2	Floral homeotic APETALA 2 -like protein [Gossypium arboreum]	--	down	down	down	down
Gorai.002G258600	--	--	Cellular Component: plasma membrane (GO:0005886);; Biological Process: transport (GO:0006810);;	--	--	--	--	Uncharacterized protein TCM_021963 [Theobroma cacao]	--	down	down	down	down
Gorai.002G259300	--	--	--	--	--	--	--	hypothetical protein F383_36747 [Gossypium arboreum]	--	down	down	down	down
Gorai.003G024600	--	--	--	--	[R]	General function prediction only	--	Peter Pan-like protein [Gossypium arboreum]	--	down	down	down	down
Gorai.003G041900	[G]	Carbohydrate transport and metabolism	Molecular Function: hydrolase activity, hydrolyzing O-glycosyl compounds (GO:0004553);; Biological Process: carbohydrate metabolic process (GO:0005975);; Molecular Function: protein binding, bridging (GO:0030674);; Molecular Function: actin filament binding (GO:0051015);;	--	--	--	--	putative glucan 1,3-beta-glucosidase a [Gossypium arboreum]	--	down	down	down	down
Gorai.003G072700	--	--	Cellular Component: nucleus (GO:0005634);; Cellular Component: endosome (GO:0005768);; Cellular Component: vacuolar membrane (GO:0005774);; Cellular Component: Golgi apparatus (GO:0005794);; Cellular Component: trans-Golgi network (GO:0005802);; Molecular Function: methyltransferase activity (GO:0008168);; Molecular Function: S-adenosylmethionine-dependent methyltransferase activity (GO:0008757);…	--	--	--	Probable methyltransferase PMT18 GN=At1g33170 OS=Arabidopsis thaliana (Mouse-ear cress) PE=2 SV=1	hypothetical protein F383_08462 [Gossypium arboreum]	--	down	down	down	down
Gorai.003G075500	--	--	Molecular Function: copper ion binding (GO:0005507);; Cellular Component: extracellular region (GO:0005576);; Cellular Component: plasma membrane (GO:0005886);; Molecular Function: electron carrier activity (GO:0009055);; Cellular Component: cytoplasmic vesicle membrane (GO:0030659);; Cellular Component: anchored component of membrane (GO:0031225);; Biological Process: cellular metabolic process …	--	--	--	Early nodulin-like protein 1 (Precursor) GN=At2g25060 OS=Arabidopsis thaliana (Mouse-ear cress) PE=1 SV=2	hypothetical protein F383_08075 [Gossypium arboreum]	--	down	down	down	down
Gorai.003G094400	[E]	Amino acid transport and metabolism	Molecular Function: transporter activity (GO:0005215);; Cellular Component: Golgi apparatus (GO:0005794);; Cellular Component: plasma membrane (GO:0005886);; Biological Process: nitrogen compound metabolic process (GO:0006807);; Biological Process: transport (GO:0006810);; Biological Process: iron ion transport (GO:0006826);; Biological Process: purine nucleobase transport (GO:0006863);; Cellular…	K14638|0|tcc:TCM_013800|Major facilitator superfamily protein, putative; K14638 solute carrier family 15 (peptide/histidine transporter), member 3/4 (A)	[E]	Amino acid transport and metabolism	Protein NRT1/ PTR FAMILY 2.10 GN=T17F15.170 OS=Arabidopsis thaliana (Mouse-ear cress) PE=1 SV=3	Major facilitator superfamily protein, putative [Theobroma cacao]	--	down	down	down	down
Gorai.003G136600	[G]	Carbohydrate transport and metabolism	Cellular Component: protein storage vacuole (GO:0000326);; Cellular Component: endoplasmic reticulum (GO:0005783);; Cellular Component: plasma membrane (GO:0005886);; Biological Process: glycolytic process (GO:0006096);; Biological Process: polyamine catabolic process (GO:0006598);; Biological Process: calcium ion transport (GO:0006816);; Biological Process: iron ion transport (GO:0006826);; Biol…	K09873|3.90841e-145|tcc:TCM_041906|Tonoplast intrinsic protein 1,3; K09873 aquaporin TIP (A)	[G]	Carbohydrate transport and metabolism	Probable aquaporin TIP1-2 OS=Oryza sativa subsp. japonica (Rice) PE=2 SV=1	Aquaporin TIP1-3 -like protein [Gossypium arboreum]	--	down	down	down	down
Gorai.003G143200	[R]	General function prediction only	Cellular Component: nucleus (GO:0005634);; Cellular Component: mitochondrion (GO:0005739);; Cellular Component: cytosol (GO:0005829);; Cellular Component: plastid (GO:0009536);; Biological Process: cytokinin biosynthetic process (GO:0009691);; Biological Process: maintenance of floral meristem identity (GO:0010076);; Biological Process: maintenance of inflorescence meristem identity (GO:0010077);…	K06966|1.47866e-127|pda:103718259|cytokinin riboside 5'-monophosphate phosphoribohydrolase LOG3; K06966 (A)	--	--	Cytokinin riboside 5&apos;-monophosphate phosphoribohydrolase LOG3 GN=LOG3 OS=Arabidopsis thaliana (Mouse-ear cress) PE=1 SV=1	Cytokinin riboside 5&apos;-monophosphate phosphoribohydrolase LOG3 -like protein [Gossypium arboreum]	--	down	down	down	down
Gorai.004G012800	--	--	Molecular Function: protein binding (GO:0005515);; Cellular Component: nucleoplasm (GO:0005654);; Cellular Component: mitochondrion (GO:0005739);; Biological Process: regulation of transcription, DNA-templated (GO:0006355);; Biological Process: determination of bilateral symmetry (GO:0009855);; Biological Process: jasmonic acid mediated signaling pathway (GO:0009867);; Biological Process: polarit…	--	--	--	LOB domain-containing protein 11 GN=T17D12.6 OS=Arabidopsis thaliana (Mouse-ear cress) PE=2 SV=2	LOB domain-containing 11 -like protein [Gossypium arboreum]	--	down	down	down	down
Gorai.004G052200	--	--	Biological Process: MAPK cascade (GO:0000165);; Biological Process: response to reactive oxygen species (GO:0000302);; Biological Process: protein targeting to membrane (GO:0006612);; Biological Process: response to cold (GO:0009409);; Cellular Component: chloroplast (GO:0009507);; Biological Process: response to wounding (GO:0009611);; Biological Process: abscisic acid-activated signaling pathwa…	--	--	--	Indole-3-acetic acid-induced protein ARG2 GN=ARG2 OS=Vigna radiata var. radiata (Mung bean) PE=2 SV=1	Indole-3-acetic acid-induced ARG2 [Gossypium arboreum]	--	down	down	down	down
Gorai.004G057700	[G]	Carbohydrate transport and metabolism	Molecular Function: ribokinase activity (GO:0004747);; Biological Process: D-ribose metabolic process (GO:0006014);; Biological Process: phosphorylation (GO:0016310);;	--	[G]	Carbohydrate transport and metabolism	Probable fructokinase-3 OS=Arabidopsis thaliana (Mouse-ear cress) PE=2 SV=1	putative sugar kinase yihV [Gossypium arboreum]	--	down	down	down	down
Gorai.004G099500	--	--	--	K06085|0|tcc:TCM_039208|Afadin- and alpha-actinin-binding protein isoform 1; K06085 synovial sarcoma, X breakpoint 2 interacting protein (A)	--	--	--	Afadin- and alpha-actinin-binding [Gossypium arboreum]	--	down	down	down	down
Gorai.004G146300	--	--	Molecular Function: inorganic anion exchanger activity (GO:0005452);; Cellular Component: endosome (GO:0005768);; Cellular Component: vacuole (GO:0005773);; Biological Process: iron ion transport (GO:0006826);; Biological Process: cellular response to iron ion starvation (GO:0010106);; Biological Process: response to nitrate (GO:0010167);; Molecular Function: anion:anion antiporter activity (GO:0…	--	[P]	Inorganic ion transport and metabolism	Boron transporter 1 GN=BOR1 OS=Arabidopsis thaliana (Mouse-ear cress) PE=1 SV=1	putative boron transporter 2 -like protein [Gossypium arboreum]	--	down	down	down	down
Gorai.004G179400	[KR]	--	Molecular Function: N-acetyltransferase activity (GO:0008080);;	--	--	--	--	Acyl-CoA N-acyltransferases superfamily protein, putative isoform 1 [Theobroma cacao]	--	down	down	down	down
Gorai.004G188300	--	--	Molecular Function: phosphorelay response regulator activity (GO:0000156);; Molecular Function: DNA binding (GO:0003677);; Molecular Function: sequence-specific DNA binding transcription factor activity (GO:0003700);; Molecular Function: binding (GO:0005488);; Molecular Function: protein binding (GO:0005515);; Cellular Component: nucleus (GO:0005634);; Biological Process: regulation of transcript…	--	[K]	Transcription	Two-component response regulator-like APRR2 GN=T6K21.200 OS=Arabidopsis thaliana (Mouse-ear cress) PE=2 SV=2	Two-component response regulator-like APRR2 [Gossypium arboreum]	--	down	down	down	down
Gorai.004G273100	--	--	Biological Process: cellular metabolic process (GO:0044237);; Biological Process: organic substance metabolic process (GO:0071704);;	--	--	--	Transcription factor bHLH147 GN=K14A17.17 OS=Arabidopsis thaliana (Mouse-ear cress) PE=1 SV=1	Sequence-specific DNA binding transcription factors, putative [Theobroma cacao]	--	down	down	down	down
Gorai.005G088800	--	--	Biological Process: MAPK cascade (GO:0000165);; Biological Process: response to hypoxia (GO:0001666);; Molecular Function: DNA binding (GO:0003677);; Molecular Function: sequence-specific DNA binding transcription factor activity (GO:0003700);; Cellular Component: nucleus (GO:0005634);; Biological Process: regulation of transcription, DNA-templated (GO:0006355);; Biological Process: protein targe…	--	--	--	NAC domain-containing protein 2 GN=T1N6.12 OS=Arabidopsis thaliana (Mouse-ear cress) PE=2 SV=2	NAC domain protein NAC3 [Gossypium hirsutum]	--	down	down	down	down
Gorai.005G098600	[M]	Cell wall/membrane/envelope biogenesis	Cellular Component: Golgi membrane (GO:0000139);; Molecular Function: protein binding (GO:0005515);; Cellular Component: nucleus (GO:0005634);; Cellular Component: mitochondrion (GO:0005739);; Cellular Component: endosome (GO:0005768);; Cellular Component: trans-Golgi network (GO:0005802);; Cellular Component: plasma membrane (GO:0005886);; Biological Process: DNA mediated transformation (GO:0009…	--	--	--	Probable xyloglucan glycosyltransferase 12 GN=CSLC12 OS=Arabidopsis thaliana (Mouse-ear cress) PE=1 SV=1	putative xyloglucan glycosyltransferase 12 -like protein [Gossypium arboreum]	--	down	down	down	down
Gorai.005G182600	--	--	Molecular Function: polygalacturonase activity (GO:0004650);; Cellular Component: extracellular region (GO:0005576);; Biological Process: polysaccharide metabolic process (GO:0005976);; Biological Process: response to stress (GO:0006950);; Biological Process: multicellular organismal development (GO:0007275);; Biological Process: response to abiotic stimulus (GO:0009628);; Biological Process: tis…	--	--	--	Probable polygalacturonase non-catalytic subunit JP650 (Precursor) GN=JP650 OS=Arabidopsis thaliana (Mouse-ear cress) PE=2 SV=2	Polygalacturonase non-catalytic subunit protein [Gossypium arboreum]	--	down	down	down	down
Gorai.005G207500	--	--	Cellular Component: nucleus (GO:0005634);; Cellular Component: cytoplasm (GO:0005737);; Biological Process: DNA repair (GO:0006281);; Biological Process: circadian rhythm (GO:0007623);; Biological Process: chloroplast organization (GO:0009658);; Biological Process: blue light signaling pathway (GO:0009785);; Biological Process: regulation of flower development (GO:0009909);; Biological Process: f…	--	--	--	B-box zinc finger protein 32 {ECO:0000303|PubMed:19920209} OS=Arabidopsis thaliana (Mouse-ear cress) PE=1 SV=1	Zinc finger CONSTANS-LIKE 2 -like protein [Gossypium arboreum]	--	down	down	down	down
Gorai.005G253100	[O]	Posttranslational modification, protein turnover, chaperones	Molecular Function: protein binding (GO:0005515);; Cellular Component: endoplasmic reticulum lumen (GO:0005788);; Cellular Component: Golgi stack (GO:0005795);; Cellular Component: plasma membrane (GO:0005886);; Biological Process: protein folding (GO:0006457);; Biological Process: response to heat (GO:0009408);; Cellular Component: plasmodesma (GO:0009506);; Biological Process: phototropism (GO:…	--	[O]	Posttranslational modification, protein turnover, chaperones	Chaperone protein dnaJ 11, chloroplastic (Precursor) GN=T19K4.170 OS=Arabidopsis thaliana (Mouse-ear cress) PE=1 SV=2	Chaperone DnaJ-domain superfamily protein [Theobroma cacao]	--	down	down	down	down
Gorai.006G007700	[RTKL]	--	Biological Process: MAPK cascade (GO:0000165);; Molecular Function: MAP kinase activity (GO:0004707);; Molecular Function: ATP binding (GO:0005524);; Cellular Component: nucleus (GO:0005634);; Cellular Component: mitochondrion (GO:0005739);; Cellular Component: vacuole (GO:0005773);; Cellular Component: cytosol (GO:0005829);; Cellular Component: plasma membrane (GO:0005886);; Biological Process: …	K04371|0|tcc:TCM_001868|MAP kinase 20; K04371 mitogen-activated protein kinase 1/3 [EC:2.7.11.24] (A)	[T]	Signal transduction mechanisms	Mitogen-activated protein kinase 20 GN=MPK20 OS=Arabidopsis thaliana (Mouse-ear cress) PE=1 SV=2	MAP kinase 20 [Theobroma cacao]	--	down	down	down	up
Gorai.006G060400	--	--	Molecular Function: DNA binding (GO:0003677);; Molecular Function: sequence-specific DNA binding transcription factor activity (GO:0003700);; Cellular Component: nucleus (GO:0005634);; Biological Process: regulation of transcription, DNA-templated (GO:0006355);; Biological Process: fatty acid catabolic process (GO:0009062);; Biological Process: jasmonic acid metabolic process (GO:0009694);; Biolo…	--	--	--	Transcription factor BEE 1 OS=Arabidopsis thaliana (Mouse-ear cress) PE=2 SV=1	Transcription factor BEE 1 -like protein [Gossypium arboreum]	--	down	down	down	up
Gorai.006G105200	[E]	Amino acid transport and metabolism	Molecular Function: asparagine synthase (glutamine-hydrolyzing) activity (GO:0004066);; Molecular Function: aspartate-ammonia ligase activity (GO:0004071);; Molecular Function: ATP binding (GO:0005524);; Cellular Component: cytosol (GO:0005829);; Biological Process: glutamine metabolic process (GO:0006541);; Biological Process: cellular amino acid catabolic process (GO:0009063);; Cellular Compone…	K01953|0|tcc:TCM_041592|Glutamine-dependent asparagine synthase 1; K01953 asparagine synthase (glutamine-hydrolysing) [EC:6.3.5.4] (A)	[E]	Amino acid transport and metabolism	Asparagine synthetase [glutamine-hydrolyzing] 1 GN=T21L8.90 OS=Arabidopsis thaliana (Mouse-ear cress) PE=2 SV=2	asparagine synthetase [Gossypium hirsutum]	Alanine, aspartate and glutamate metabolism (ko00250)	down	down	down	up
Gorai.006G147300	--	--	--	--	--	--	--	Uncharacterized protein TCM_023118 [Theobroma cacao]	--	down	down	up	down
Gorai.006G178000	--	--	Molecular Function: DNA binding (GO:0003677);; Molecular Function: chromatin binding (GO:0003682);; Molecular Function: sequence-specific DNA binding transcription factor activity (GO:0003700);; Molecular Function: protein binding (GO:0005515);; Cellular Component: nucleus (GO:0005634);; Biological Process: response to cold (GO:0009409);; Biological Process: response to red or far red light (GO:0…	--	[O]	Posttranslational modification, protein turnover, chaperones	Protein REVEILLE 8 GN=F11F8.19 OS=Arabidopsis thaliana (Mouse-ear cress) PE=2 SV=1	Transcription factor ASG4 -like protein [Gossypium arboreum]	--	down	down	up	down
Gorai.006G217600	--	--	Biological Process: cell morphogenesis (GO:0000902);; Molecular Function: SNAP receptor activity (GO:0005484);; Cellular Component: nucleus (GO:0005634);; Cellular Component: late endosome (GO:0005770);; Cellular Component: trans-Golgi network (GO:0005802);; Cellular Component: plasma membrane (GO:0005886);; Biological Process: protein targeting to vacuole (GO:0006623);; Biological Process: phosp…	K08488|2.59926e-141|pop:POPTR_0001s02100g|syntaxin family protein; K08488 syntaxin 7 (A)	[U]	Intracellular trafficking, secretion, and vesicular transport	Syntaxin-22 GN=MSD23.9 OS=Arabidopsis thaliana (Mouse-ear cress) PE=1 SV=1	Syntaxin-22 -like protein [Gossypium arboreum]	SNARE interactions in vesicular transport (ko04130);; Phagosome (ko04145)	down	down	up	up
Gorai.007G017100	[T]	Signal transduction mechanisms	Biological Process: phosphorelay signal transduction system (GO:0000160);; Molecular Function: sequence-specific DNA binding transcription factor activity (GO:0003700);; Molecular Function: protein binding (GO:0005515);; Cellular Component: nucleus (GO:0005634);; Biological Process: regulation of transcription, DNA-templated (GO:0006355);; Biological Process: circadian rhythm (GO:0007623);; Biolo…	K12130|0|tcc:TCM_015513|Pseudo-response regulator 5, putative isoform 1; K12130 pseudo-response regulator 5 (A)	[K]	Transcription	Two-component response regulator-like APRR5 GN=APRR5 OS=Arabidopsis thaliana (Mouse-ear cress) PE=1 SV=2	Two-component response regulator-like APRR5 [Gossypium arboreum]	Circadian rhythm - plant (ko04712)	up	down	up	up
Gorai.007G045500	--	--	Biological Process: MAPK cascade (GO:0000165);; Molecular Function: calcium ion binding (GO:0005509);; Cellular Component: mitochondrion (GO:0005739);; Cellular Component: vacuolar membrane (GO:0005774);; Cellular Component: endoplasmic reticulum membrane (GO:0005789);; Cellular Component: Golgi apparatus (GO:0005794);; Cellular Component: cytosol (GO:0005829);; Cellular Component: plasma membran…	K08054|0|tcc:TCM_014785|Calnexin 1; K08054 calnexin (A)	[O]	Posttranslational modification, protein turnover, chaperones	Calnexin homolog (Precursor) OS=Glycine max (Soybean) PE=2 SV=1	Calnexin 1 [Theobroma cacao]	Protein processing in endoplasmic reticulum (ko04141);; Phagosome (ko04145)	up	up	down	down
Gorai.007G072700	--	--	--	--	--	--	Light-regulated protein (Precursor) OS=Oryza sativa subsp. japonica (Rice) PE=2 SV=1	cold-circadian (cold circadian rhythm-RNA binding)-like protein [Gossypium hirsutum]	--	up	up	down	down
Gorai.007G078500	[KLB]	--	Biological Process: RNA splicing, via endonucleolytic cleavage and ligation (GO:0000394);; Molecular Function: DNA binding (GO:0003677);; Molecular Function: sequence-specific DNA binding transcription factor activity (GO:0003700);; Cellular Component: nuclear euchromatin (GO:0005719);; Biological Process: DNA replication (GO:0006260);; Biological Process: DNA repair (GO:0006281);; Biological Pro…	K09272|0|tcc:TCM_018380|High mobility group isoform 1; K09272 structure-specific recognition protein 1 (A)	[KLB]	--	FACT complex subunit SSRP1 GN=SSRP1 OS=Vicia faba (Broad bean) PE=2 SV=1	High mobility group isoform 1 [Theobroma cacao]	--	up	up	down	down
Gorai.007G103700	--	--	Cellular Component: cytosol (GO:0005829);; Cellular Component: plasma membrane (GO:0005886);; Biological Process: response to desiccation (GO:0009269);; Biological Process: response to cold (GO:0009409);; Biological Process: response to wounding (GO:0009611);; Biological Process: response to high light intensity (GO:0009644);; Biological Process: response to abscisic acid (GO:0009737);; Biologica…	--	--	--	Late embryogenesis abundant protein Lea14-A GN=LEA14-A OS=Gossypium hirsutum (Upland cotton) PE=2 SV=1	Late embryogenesis abundant Lea[2]4-A [Gossypium arboreum]	--	up	up	down	down
Gorai.007G113900	--	--	Molecular Function: DNA binding (GO:0003677);; Molecular Function: sequence-specific DNA binding transcription factor activity (GO:0003700);; Molecular Function: protein binding (GO:0005515);; Cellular Component: nucleus (GO:0005634);; Biological Process: regulation of transcription, DNA-templated (GO:0006355);; Biological Process: response to salt stress (GO:0009651);; Biological Process: respon…	K12133|0|tcc:TCM_005021|Homeodomain-like superfamily protein isoform 1; K12133 MYB-related transcription factor LHY (A)	[O]	Posttranslational modification, protein turnover, chaperones	Protein LHY GN=LHY OS=Arabidopsis thaliana (Mouse-ear cress) PE=1 SV=2	Protein LHY -like protein [Gossypium arboreum]	Circadian rhythm - plant (ko04712)	up	up	down	up
Gorai.007G150000	--	--	Molecular Function: acid phosphatase activity (GO:0003993);; Molecular Function: protein binding (GO:0005515);; Cellular Component: mitochondrion (GO:0005739);; Cellular Component: endosome (GO:0005768);; Cellular Component: Golgi apparatus (GO:0005794);; Cellular Component: trans-Golgi network (GO:0005802);; Biological Process: regulation of carbohydrate metabolic process (GO:0006109);; Biologic…	K14484|1.05146e-126|tcc:TCM_003903|Indole-3-acetic acid inducible 11, putative isoform 1; K14484 auxin-responsive protein IAA (A)	--	--	Auxin-responsive protein IAA11 GN=IAA11 OS=Arabidopsis thaliana (Mouse-ear cress) PE=1 SV=1	auxin-responsive protein [Gossypium hirsutum]	Plant hormone signal transduction (ko04075)	up	up	down	up
Gorai.007G166100	[B]	Chromatin structure and dynamics	Molecular Function: DNA binding (GO:0003677);; Molecular Function: sequence-specific DNA binding transcription factor activity (GO:0003700);; Molecular Function: protein binding (GO:0005515);; Cellular Component: nucleus (GO:0005634);; Biological Process: regulation of transcription, DNA-templated (GO:0006355);; Molecular Function: sequence-specific DNA binding (GO:0043565);; Molecular Function: …	--	[K]	Transcription	Nuclear transcription factor Y subunit B-3 OS=Arabidopsis thaliana (Mouse-ear cress) PE=2 SV=1	Nuclear transcription factor Y subunit B-3 [Theobroma cacao]	--	up	up	down	up
Gorai.007G196900	--	--	Cellular Component: intracellular (GO:0005622);; Cellular Component: nucleus (GO:0005634);; Biological Process: response to osmotic stress (GO:0006970);; Biological Process: circadian rhythm (GO:0007623);; Molecular Function: zinc ion binding (GO:0008270);; Biological Process: response to blue light (GO:0009637);; Biological Process: shade avoidance (GO:0009641);; Biological Process: response to …	--	--	--	B-box zinc finger protein 19 {ECO:0000303|PubMed:19920209} OS=Arabidopsis thaliana (Mouse-ear cress) PE=2 SV=1	B-box type zinc finger family protein [Theobroma cacao]	--	up	up	down	up
Gorai.007G241600	[I]	Lipid transport and metabolism	Molecular Function: inositol-3-phosphate synthase activity (GO:0004512);; Cellular Component: cytoplasm (GO:0005737);; Biological Process: inositol biosynthetic process (GO:0006021);; Biological Process: phosphatidylserine biosynthetic process (GO:0006659);; Biological Process: phospholipid biosynthetic process (GO:0008654);; Biological Process: response to heat (GO:0009408);; Biological Process:…	K01858|0|tcc:TCM_001164|Myo-inositol-1-phosphate synthase 2; K01858 myo-inositol-1-phosphate synthase [EC:5.5.1.4] (A)	[I]	Lipid transport and metabolism	Inositol-3-phosphate synthase GN=INPS1 OS=Nicotiana paniculata PE=2 SV=1	Inositol-3-phosphate synthase [Gossypium arboreum]	Inositol phosphate metabolism (ko00562)	up	up	down	up
Gorai.007G353200	[R]	General function prediction only	Biological Process: metabolic process (GO:0008152);; Molecular Function: phosphoglycolate phosphatase activity (GO:0008967);; Biological Process: response to arsenic-containing substance (GO:0046685);; Biological Process: photoperiodism, flowering (GO:0048573);;	--	[R]	General function prediction only	--	Haloacid dehalogenase-like hydrolase domain-containing protein 3 [Gossypium arboreum]	--	up	up	down	up
Gorai.007G011500	--	--	Cellular Component: integral component of membrane (GO:0016021);; Biological Process: transmembrane transport (GO:0055085);;	--	[P]	Inorganic ion transport and metabolism	--	Putative transporter arsB [Gossypium arboreum]	--	down	up	down	up

## Sheet: Table S2
Table S2. DEGs of G.thurberi
Gorai.001G000800	4.08583	0.787732	1.27505	2.84456	12.5029	102.677	7.15423	9.80967	0.986712	14.2569	0.0266377	1.70955	normal	2.20268e-13	3.22728	up	2.18636e-07	-2.67273	down	0.735778	0.548597	normal	[P]	Inorganic ion transport and metabolism	Biological Process: response to lead ion (GO:0010288);; Biological Process: response to cadmium ion (GO:0046686);;	--	[P]	Inorganic ion transport and metabolism	--	Cation transport regulator-like protein 2 [Gossypium arboreum]	--
Gorai.001G001000	8.67655	16.0068	10.1792	5.70836	3.98515	5.63756	11.0018	7.72875	8.28937	6.83432	0.00969809	-1.51807	down	0.00641627	-1.36982	down	0.868157	-0.385179	normal	0.925516	-0.222762	normal	[M]	Cell wall/membrane/envelope biogenesis	Molecular Function: transferase activity (GO:0016740);;	K03438|0|tcc:TCM_036762|MraW methylase family protein isoform 1; K03438 16S rRNA (cytosine1402-N4)-methyltransferase [EC:2.1.1.199] (A)	[R]	General function prediction only	--	Ribosomal RNA small subunit methyltransferase H [Gossypium arboreum]	--
Gorai.001G001800	0.0434346	0.29797	0.514087	2.00731	1.16603	0	0.0340652	1.12304	2.14209	1.4343	0.00319831	2.44039	up	0.73366	1.13469	normal	1.90373e-07	4.39426	up	0.946441	0.337553	normal	--	--	Molecular Function: peroxidase activity (GO:0004601);; Molecular Function: protein binding (GO:0005515);; Cellular Component: extracellular region (GO:0005576);; Cellular Component: vacuolar membrane (GO:0005774);; Cellular Component: cytosol (GO:0005829);; Biological Process: steroid biosynthetic process (GO:0006694);; Biological Process: iron ion transport (GO:0006826);; Biological Process: res…	K00430|0|tcc:TCM_036816|Peroxidase superfamily protein; K00430 peroxidase [EC:1.11.1.7] (A)	--	--	Peroxidase 45 (Precursor) GN=F9N11.20 OS=Arabidopsis thaliana (Mouse-ear cress) PE=1 SV=1	class III peroxidase [Gossypium hirsutum]	Phenylalanine metabolism (ko00360);; Phenylpropanoid biosynthesis (ko00940)
Gorai.001G001900	1.45049	2.18476	1.52026	4.64667	4.30715	1.3387	1.23079	1.46837	2.85477	2.10225	0.238401	1.08667	normal	0.00876722	1.45098	up	0.171093	1.18061	normal	0.862255	0.498837	normal	--	--	--	--	--	--	--	Uncharacterized protein TCM_036818 [Theobroma cacao]	--
Gorai.001G002000	40.227	7.91663	12.0184	24.0847	33.5785	24.3931	10.6254	12.5656	5.64904	9.26703	0.00389495	1.61364	up	0.00238408	1.41298	up	0.538689	-0.802859	normal	0.835874	-0.470963	normal	--	--	Molecular Function: ubiquitin-protein transferase activity (GO:0004842);; Molecular Function: protein binding (GO:0005515);; Cellular Component: nucleus (GO:0005634);; Cellular Component: cytosol (GO:0005829);; Biological Process: amino acid transport (GO:0006865);; Biological Process: response to stress (GO:0006950);; Biological Process: negative regulation of abscisic acid-activated signaling p…	--	[O]	Posttranslational modification, protein turnover, chaperones	Probable E3 ubiquitin-protein ligase HIP1 OS=Oryza sativa subsp. japonica (Rice) PE=1 SV=2	RING/U-box superfamily protein, putative isoform 1 [Theobroma cacao]	--
Gorai.001G002500	13.8931	1.95918	5.42057	10.6443	9.99405	12.2691	6.5054	8.06783	5.3721	10.4194	6.79904e-06	2.38878	up	0.440787	0.815405	normal	0.88116	-0.217238	normal	0.879843	0.369095	normal	[RTKL]	--	Molecular Function: protein serine/threonine kinase activity (GO:0004674);; Molecular Function: ATP binding (GO:0005524);; Cellular Component: plasma membrane (GO:0005886);; Biological Process: polysaccharide metabolic process (GO:0005976);; Biological Process: protein phosphorylation (GO:0006468);; Biological Process: protein N-linked glycosylation (GO:0006487);; Biological Process: response to …	--	[T]	Signal transduction mechanisms	Probable receptor-like protein kinase At5g20050 (Precursor) GN=At5g20050 OS=Arabidopsis thaliana (Mouse-ear cress) PE=2 SV=1	Receptor protein kinase [Theobroma cacao]	--
Gorai.001G003200	2.6558	7.01063	2.02389	2.13938	3.43082	2.9118	20.7663	2.87948	7.22882	6.83706	0.00177692	-1.76085	down	0.632796	0.714484	normal	0.00370143	-1.51695	down	0.00574875	1.20873	up	[RTKL]	--	Biological Process: polysaccharide catabolic process (GO:0000272);; Biological Process: respiratory burst involved in defense response (GO:0002679);; Molecular Function: protein serine/threonine kinase activity (GO:0004674);; Molecular Function: protein tyrosine kinase activity (GO:0004713);; Molecular Function: ATP binding (GO:0005524);; Cellular Component: mitochondrion (GO:0005739);; Cellular …	--	--	--	Probable inactive receptor kinase At2g26730 (Precursor) GN=At2g26730 OS=Arabidopsis thaliana (Mouse-ear cress) PE=1 SV=1	Leucine-rich repeat protein kinase family protein [Theobroma cacao]	--
Gorai.001G003900	4.57396	12.0681	7.80617	4.10534	3.851	2.59896	8.31101	4.45745	3.53078	3.37016	0.00920876	-1.54492	down	0.19178	-0.999234	normal	0.135413	-1.12893	normal	0.874745	-0.40531	normal	--	--	Biological Process: embryo development ending in seed dormancy (GO:0009793);; Cellular Component: membrane (GO:0016020);;	--	[S]	Function unknown	--	Serinc-domain containing serine and sphingolipid biosynthesis protein isoform 2 [Theobroma cacao]	--
Gorai.001G005200	13.7128	8.1156	10.5158	2.0661	4.65458	63.715	14.2448	39.084	11.8809	23.2559	0.000122898	-2.00559	down	0.073541	-1.08858	normal	0.935997	-0.180835	normal	0.315621	-0.791049	normal	--	--	--	--	[Z]	Cytoskeleton	--	IST1-like protein [Gossypium arboreum]	--
Gorai.001G005600	93.7694	6.12653	16.2814	22.0444	37.7432	90.3927	12.9737	13.9307	8.61194	18.9542	0.000405718	1.83544	up	0.0270645	1.20428	normal	0.823731	-0.522824	normal	0.877635	0.43396	normal	[O]	Posttranslational modification, protein turnover, chaperones	Molecular Function: fatty-acyl-CoA binding (GO:0000062);; Molecular Function: catalytic activity (GO:0003824);; Molecular Function: protein binding (GO:0005515);; Molecular Function: ATP binding (GO:0005524);; Cellular Component: endoplasmic reticulum (GO:0005783);; Cellular Component: plasma membrane (GO:0005886);; Biological Process: ATP catabolic process (GO:0006200);; Biological Process: prot…	--	[O]	Posttranslational modification, protein turnover, chaperones	Protein cfxQ homolog GN=cfxQ OS=Cyanidium caldarium PE=3 SV=1	AAA-type ATPase family protein / ankyrin repeat family protein isoform 1 [Theobroma cacao]	--
Gorai.001G005900	1.74846	4.67349	2.01611	0.652294	0.949328	1.01653	4.89706	0.98381	1.69395	1.32214	3.0609e-07	-2.78691	down	0.404011	-0.982611	normal	0.019956	-1.41332	normal	0.912388	0.417671	normal	--	--	--	--	--	--	--	Actin-binding LIM 3 [Gossypium arboreum]	--
Gorai.001G006200	1.30021	2.67675	2.02514	0.756158	1.14494	5.68405	5.18376	5.25871	5.22119	5.0098	0.00585097	-1.79083	down	0.537373	-0.852161	normal	0.910186	0.0382946	normal	0.941748	-0.0811577	normal	--	--	Molecular Function: nucleotide binding (GO:0000166);; Molecular Function: ATP binding (GO:0005524);; Cellular Component: cell wall (GO:0005618);; Cellular Component: nuclear envelope (GO:0005635);; Cellular Component: nucleoplasm (GO:0005654);; Cellular Component: nucleolus (GO:0005730);; Cellular Component: Golgi apparatus (GO:0005794);; Cellular Component: spindle (GO:0005819);; Cellular Compon…	--	[O]	Posttranslational modification, protein turnover, chaperones	Cell division control protein 48 homolog B GN=CDC48B OS=Arabidopsis thaliana (Mouse-ear cress) PE=2 SV=1	Cell division control 48 B -like protein [Gossypium arboreum]	--
Gorai.001G006400	1.19787	3.14733	1.13771	0.176727	1.21343	1.74699	22.9891	2.6664	1.28994	2.08671	4.45219e-09	-3.70823	down	0.920766	0.0423441	normal	0	-4.0479	down	0.891071	-0.36903	normal	[I]	Lipid transport and metabolism	Molecular Function: nucleotide binding (GO:0000166);; Molecular Function: mRNA binding (GO:0003729);; Molecular Function: 3-hydroxyacyl-CoA dehydrogenase activity (GO:0003857);; Molecular Function: dodecenoyl-CoA delta-isomerase activity (GO:0004165);; Molecular Function: enoyl-CoA hydratase activity (GO:0004300);; Cellular Component: cell wall (GO:0005618);; Cellular Component: nucleolus (GO:000…	K10527|0|tcc:TCM_037853|Enoyl-CoA hydratase/isomerase family; K10527 enoyl-CoA hydratase/3-hydroxyacyl-CoA dehydrogenase [EC:4.2.1.17 1.1.1.35 1.1.1.211] (A)	[I]	Lipid transport and metabolism	3-hydroxyacyl-CoA dehydrogenase GN=AIM1 OS=Arabidopsis thaliana (Mouse-ear cress) PE=1 SV=1	Enoyl-CoA hydratase/isomerase family [Theobroma cacao]	Fatty acid degradation (ko00071);; alpha-Linolenic acid metabolism (ko00592);; Fatty acid metabolism (ko01212)
Gorai.001G008600	136.417	0.925405	75.1177	23.9543	48.2044	130.041	1.39742	6.5979	1.12205	13.3257	1.42109e-14	4.43227	up	0.685243	-0.686154	normal	0.961301	-0.178327	normal	0.133056	1.00483	normal	--	--	--	--	--	--	Lachrymatory-factor synthase (Precursor) GN=LFS OS=Allium cepa (Onion) PE=1 SV=1	Polyketide cyclase/dehydrase and lipid transport superfamily protein [Theobroma cacao]	--
Gorai.001G008700	120.601	2.00744	17.5093	21.2216	33.6554	151.72	4.44846	60.6638	8.45528	38.5887	1.13641e-10	3.27778	up	0.517512	0.771336	normal	0.459376	0.871406	normal	0.563813	-0.672412	normal	--	--	--	--	--	--	Formin-like protein 6 OS=Oryza sativa subsp. japonica (Rice) PE=2 SV=2	Uncharacterized protein TCM_037801 [Theobroma cacao]	--
Gorai.001G009300	0.312409	1.61283	1.97925	0.368057	0.0352393	0.326981	1.55011	0.0803823	0.220925	0.136981	0.032086	-1.91661	normal	3.0524e-09	-4.71659	down	0.00250958	-2.42968	down	--	--	--	--	--	Biological Process: cellular process (GO:0009987);; Cellular Component: cell part (GO:0044464);;	--	--	--	Protein IQ-DOMAIN 31 GN=IQD31 OS=Arabidopsis thaliana (Mouse-ear cress) PE=1 SV=1	Protein IQ-DOMAIN 31 -like protein [Gossypium arboreum]	--
Gorai.001G009500	168.633	59.759	68.9582	8.20116	22.3635	66.6363	35.2107	96.8538	33.4633	30.5219	1.07016e-08	-2.81064	down	0.000267677	-1.6003	down	0.913991	-0.0861637	normal	1.2219e-06	-1.60258	down	--	--	--	--	[T]	Signal transduction mechanisms	--	Uncharacterized protein TCM_037765 [Theobroma cacao]	--
Gorai.001G009800	5.41866	5.92282	5.47655	0.594076	0.556286	11.5091	8.24351	6.89687	1.93086	1.4522	8.21497e-09	-3.23071	down	1.47228e-10	-3.20802	down	4.22262e-05	-2.05418	down	1.02775e-08	-2.2286	down	--	--	Cellular Component: plant-type cell wall (GO:0009505);;	--	--	--	--	hypothetical protein F383_08453 [Gossypium arboreum]	--
Gorai.001G011600	19.148	14.4228	13.3441	1.22813	8.57102	13.4753	4.02949	5.50057	8.5038	10.1649	5.9619e-13	-3.49696	down	0.667789	-0.682667	normal	0.132174	1.10257	normal	0.0990615	0.895538	normal	[G]	Carbohydrate transport and metabolism	Molecular Function: beta-galactosidase activity (GO:0004565);; Cellular Component: vacuolar membrane (GO:0005774);; Cellular Component: cytosol (GO:0005829);; Biological Process: carbohydrate metabolic process (GO:0005975);; Biological Process: acetyl-CoA metabolic process (GO:0006084);; Biological Process: polyamine catabolic process (GO:0006598);; Cellular Component: plant-type cell wall (GO:00…	--	[G]	Carbohydrate transport and metabolism	Beta-galactosidase (Precursor) OS=Malus domestica (Apple) PE=1 SV=1	Beta-galactosidase [Gossypium arboreum]	--
Gorai.001G012000	10.0229	3.30014	6.23392	15.4161	17.1486	6.19012	1.93086	0.933655	5.89167	4.01282	9.63328e-06	2.1591	up	0.00402367	1.369	up	0.00191724	1.59031	up	1.0423e-08	2.06761	up	--	--	Biological Process: RNA splicing, via endonucleolytic cleavage and ligation (GO:0000394);; Molecular Function: protein serine/threonine kinase activity (GO:0004674);; Molecular Function: protein binding (GO:0005515);; Cellular Component: plasma membrane (GO:0005886);; Biological Process: methionine biosynthetic process (GO:0009086);; Biological Process: defense response to bacterium, incompatible…	--	[T]	Signal transduction mechanisms	Receptor-like serine/threonine-protein kinase ALE2 (Precursor) GN=ALE2 OS=Arabidopsis thaliana (Mouse-ear cress) PE=1 SV=1	Serine/threonine-protein kinase PBS1 isoform 4 [Theobroma cacao]	--
Gorai.001G012400	0.538926	0.191432	0	1.68671	1.07784	0.189389	0.33716	0.675986	0.456808	1.45408	0.00126803	2.73084	up	0.000591851	3.67183	up	--	--	--	0.729708	0.997019	normal	--	--	Molecular Function: DNA binding (GO:0003677);; Molecular Function: sequence-specific DNA binding transcription factor activity (GO:0003700);; Molecular Function: protein binding (GO:0005515);; Cellular Component: nucleus (GO:0005634);; Biological Process: regulation of transcription, DNA-templated (GO:0006355);; Biological Process: response to endogenous stimulus (GO:0009719);; Biological Process…	--	--	--	Putative transcription factor bHLH041 GN=MHM17.7 OS=Arabidopsis thaliana (Mouse-ear cress) PE=3 SV=1	Basic helix-loop-helix DNA-binding family protein, putative [Theobroma cacao]	--
Gorai.001G013100	10.8998	4.29863	3.95093	7.9456	29.3192	7.30146	5.95432	4.36263	7.59719	9.23457	0.411563	0.927626	normal	2.66454e-14	3.00747	up	0.800255	0.503599	normal	0.0224051	1.08004	normal	[I]	Lipid transport and metabolism	Molecular Function: diacylglycerol O-acyltransferase activity (GO:0004144);; Cellular Component: endoplasmic reticulum membrane (GO:0005789);; Cellular Component: integral component of membrane (GO:0016021);; Biological Process: triglyceride biosynthetic process (GO:0019432);;	K11155|0|tcc:TCM_037624|Membrane bound O-acyl transferase (MBOAT) family protein isoform 1; K11155 diacylglycerol O-acyltransferase 1 [EC:2.3.1.20 2.3.1.75 2.3.1.76] (A)	[I]	Lipid transport and metabolism	Diacylglycerol O-acyltransferase 1 GN=F3P11.5 OS=Arabidopsis thaliana (Mouse-ear cress) PE=1 SV=2	Diacylglycerol O-acyltransferase 1 -like protein [Gossypium arboreum]	Glycerolipid metabolism (ko00561)
Gorai.001G014300	40.3578	18.9357	19.1909	61.2341	67.2194	35.3468	23.3955	25.1804	35.5408	33.7808	0.00195991	1.68989	up	1.33165e-05	1.78631	up	0.773863	0.663477	normal	0.898463	0.415699	normal	[N]	Cell motility	Cellular Component: cytoplasm (GO:0005737);; Biological Process: transport (GO:0006810);; Biological Process: protein transport (GO:0015031);; Cellular Component: intracellular membrane-bounded organelle (GO:0043231);;	K12191|7.19693e-127|rcu:RCOM_1045990|Charged multivesicular body protein 2a, putative; K12191 charged multivesicular body protein 2A (A)	[U]	Intracellular trafficking, secretion, and vesicular transport	Vacuolar protein sorting-associated protein 2 homolog 1 GN=T12H3.8 OS=Arabidopsis thaliana (Mouse-ear cress) PE=1 SV=2	Uncharacterized protein F383_22856 [Gossypium arboreum]	Endocytosis (ko04144)
Gorai.001G014400	2.14302	10.4585	4.61166	1.84718	4.65302	6.33344	10.0205	5.10211	2.79621	4.57992	0.000570407	-2.3751	down	0.932089	-0.0695165	normal	0.0171552	-1.75527	normal	0.952757	-0.189054	normal	--	--	Biological Process: respiratory burst involved in defense response (GO:0002679);; Molecular Function: ubiquitin-protein transferase activity (GO:0004842);; Cellular Component: plasma membrane (GO:0005886);; Biological Process: response to chitin (GO:0010200);; Biological Process: proline transport (GO:0015824);; Biological Process: protein ubiquitination (GO:0016567);; Biological Process: amino a…	--	[O]	Posttranslational modification, protein turnover, chaperones	RING-H2 finger protein ATL52 GN=ATL52 OS=Arabidopsis thaliana (Mouse-ear cress) PE=2 SV=1	RING/U-box superfamily protein, putative [Theobroma cacao]	--
Gorai.001G014500	486.351	407.47	551.73	192.77	180.406	605.474	314.537	542.667	719.465	608.147	0.357954	-1.11257	normal	0.00026347	-1.60066	down	0.0812185	1.29014	normal	0.992086	0.10914	normal	--	--	Cellular Component: photosystem II (GO:0009523);; Biological Process: photosynthesis (GO:0015979);;	--	--	--	--	ultraviolet-B-repressible protein [Gossypium hirsutum]	--
Gorai.001G016400	131.202	152.503	104.166	51.3075	44.8778	71.6501	127.615	66.2225	66.0611	45.6561	0.00351166	-1.66442	down	0.0101976	-1.30225	normal	0.458185	-0.974139	normal	0.797364	-0.562387	normal	--	--	Biological Process: pentose-phosphate shunt (GO:0006098);; Biological Process: rRNA processing (GO:0006364);; Cellular Component: chloroplast (GO:0009507);; Cellular Component: photosystem I (GO:0009522);; Cellular Component: photosystem II (GO:0009523);; Cellular Component: chloroplast thylakoid membrane (GO:0009535);; Biological Process: response to red or far red light (GO:0009639);; Biologica…	K08908|2.01332e-156|tcc:TCM_037497|Photosystem I light harvesting complex gene 6 isoform 1; K08908 light-harvesting complex I chlorophyll a/b binding protein 2 (A)	--	--	Chlorophyll a-b binding protein, chloroplastic (Precursor) OS=Petunia hybrida (Petunia) PE=2 SV=1	Chlorophyll a-b binding, chloroplastic [Gossypium arboreum]	Photosynthesis - antenna proteins (ko00196)
Gorai.001G016700	7.81284	39.8603	15.8467	15.0534	5.72141	4.2667	33.7778	28.2897	39.9087	8.32686	0.0474193	-1.32256	normal	0.00915209	-1.40618	down	0.888204	0.395764	normal	1.40967e-06	-1.7157	down	--	--	--	--	--	--	--	Cyclin-dependent kinase 1 [Gossypium arboreum]	--
Gorai.001G017200	90.6512	168.371	142.973	28.6903	15.3419	75.3603	70.1189	17.2709	94.5049	61.1176	1.29426e-08	-2.66027	down	0	-3.27996	down	0.926583	0.422222	normal	2.49432e-08	1.78598	up	--	--	Molecular Function: enzyme inhibitor activity (GO:0004857);; Biological Process: response to stress (GO:0006950);; Biological Process: metabolic process (GO:0008152);; Biological Process: cellular component organization (GO:0016043);; Molecular Function: pectinesterase activity (GO:0030599);; Biological Process: negative regulation of catalytic activity (GO:0043086);; Biological Process: single-o…	--	--	--	21 kDa protein (Precursor) OS=Daucus carota (Wild carrot) PE=2 SV=1	Plant invertase/pectin methylesterase inhibitor superfamily protein [Theobroma cacao]	--
Gorai.001G017600	4.4977	20.3665	12.1131	7.92526	2.63548	13.202	36.322	13.9753	45.3179	23.9973	0.0309345	-1.42822	normal	0.000153393	-2.05992	down	0.882438	0.386703	normal	0.456142	0.722239	normal	--	--	--	--	--	--	--	SAUR family protein [Theobroma cacao]	--
Gorai.001G018200	4.25988	3.54742	0.214273	0.102305	0.62233	2.21462	43.2421	0	0.65682	0.037804	4.3141e-10	-4.39683	down	--	--	--	0	-5.88135	down	--	--	--	--	--	Molecular Function: enzyme inhibitor activity (GO:0004857);; Cellular Component: cell wall (GO:0005618);; Biological Process: catabolic process (GO:0009056);; Biological Process: cellular component organization (GO:0016043);; Biological Process: regulation of metabolic process (GO:0019222);; Molecular Function: pectinesterase activity (GO:0030599);; Biological Process: cellular response to stress…	K01051|0|tcc:TCM_037448|Plant invertase/pectin methylesterase inhibitor superfamily; K01051 pectinesterase [EC:3.1.1.11] (A)	--	--	Pectinesterase 54 (Precursor) GN=F22D1.30 OS=Arabidopsis thaliana (Mouse-ear cress) PE=2 SV=1	Plant invertase/pectin methylesterase inhibitor superfamily [Theobroma cacao]	Pentose and glucuronate interconversions (ko00040);; Starch and sucrose metabolism (ko00500)
Gorai.001G018300	43.5138	19.7537	17.4181	36.9165	82.6469	52.4328	28.3723	10.9063	50.0448	90.5875	0.579563	0.899185	normal	2.5632e-08	2.16331	up	0.481415	0.941991	normal	0	3.04198	up	--	--	Molecular Function: enzyme inhibitor activity (GO:0004857);; Cellular Component: extracellular region (GO:0005576);; Biological Process: protein targeting to membrane (GO:0006612);; Biological Process: water transport (GO:0006833);; Cellular Component: plant-type cell wall (GO:0009505);; Biological Process: response to salt stress (GO:0009651);; Biological Process: response to fructose (GO:000975…	K01051|0|tcc:TCM_037443|Pectinesterase/pectinesterase inhibitor PPE8B; K01051 pectinesterase [EC:3.1.1.11] (A)	--	--	Pectinesterase PPE8B (Precursor) OS=Prunus persica (Peach) PE=2 SV=1	Pectinesterase/pectinesterase inhibitor PPE8B [Gossypium arboreum]	Pentose and glucuronate interconversions (ko00040);; Starch and sucrose metabolism (ko00500)
Gorai.001G019300	8.06488	36.1514	43.5437	3.17842	3.12389	8.20923	37.1209	17.541	7.33052	3.31889	1.59017e-12	-3.51586	down	0	-3.73016	down	8.16171e-07	-2.26866	down	2.63643e-10	-2.38855	down	--	--	--	--	--	--	--	Arginine--tRNA ligase [Gossypium arboreum]	--
Gorai.001G019700	215.774	19.1255	84.8746	24.0548	13.7387	276.339	16.9507	83.4059	45.2709	51.0356	0.900362	0.323158	normal	1.58484e-12	-2.68087	down	0.00640093	1.45763	up	0.510972	-0.715695	normal	--	--	--	--	[K]	Transcription	--	Copper homeostasis cutC [Gossypium arboreum]	--
Gorai.001G019800	3.20079	16.8136	8.01445	2.59043	1.01313	1.30338	7.92901	1.02242	1.70594	0.680112	3.23772e-08	-2.63557	down	1.01983e-11	-2.85259	down	1.35477e-05	-2.06662	down	0.874488	-0.565903	normal	[S]	Function unknown	Biological Process: polysaccharide catabolic process (GO:0000272);; Biological Process: regulation of cell growth (GO:0001558);; Biological Process: cell fate specification (GO:0001708);; Biological Process: response to molecule of bacterial origin (GO:0002237);; Molecular Function: protein serine/threonine kinase activity (GO:0004674);; Molecular Function: protein binding (GO:0005515);; Molecula…	--	--	--	LRR receptor-like serine/threonine-protein kinase ERECTA {ECO:0000303|PubMed:8624444} (Precursor) OS=Arabidopsis thaliana (Mouse-ear cress) PE=1 SV=1	Leucine-rich receptor-like protein kinase family protein [Theobroma cacao]	--
Gorai.001G019900	9.35583	75.6599	86.1876	38.2549	16.8892	21.0051	44.3509	93.2988	117.992	74.1227	0.330809	-1.0254	normal	4.23383e-09	-2.30374	down	0.00394689	1.50974	up	0.928381	-0.376029	normal	[S]	Function unknown	--	K02221|1.90834e-138|tcc:TCM_037390|YGGT family protein; K02221 YggT family protein (A)	--	--	Uncharacterized protein ycf19 GN=ycf19 OS=Guillardia theta (Cryptomonas phi) PE=3 SV=1	putative ycf19 [Gossypium arboreum]	--
Gorai.001G020900	0.591596	1.88688	0.877265	0.235837	0.342113	0.788796	1.78923	0.282669	0.866541	0.179392	6.51358e-05	-2.80066	down	0.519773	-1.3306	normal	0.564125	-0.924584	normal	--	--	--	[M]	Cell wall/membrane/envelope biogenesis	Biological Process: transition metal ion transport (GO:0000041);; Cellular Component: nucleus (GO:0005634);; Cellular Component: vacuolar membrane (GO:0005774);; Cellular Component: plasma membrane (GO:0005886);; Biological Process: anion transport (GO:0006820);; Molecular Function: mechanically-gated ion channel activity (GO:0008381);; Cellular Component: plasmodesma (GO:0009506);; Biological Pr…	--	[M]	Cell wall/membrane/envelope biogenesis	Mechanosensitive ion channel protein 10 GN=MSL10 OS=Arabidopsis thaliana (Mouse-ear cress) PE=1 SV=1	Mechanosensitive ion channel 10 -like protein [Gossypium arboreum]	--
Gorai.001G022700	15.3887	29.194	30.2211	13.4774	10.4619	10.8964	30.5506	11.8719	13.4789	10.5376	0.109123	-1.20562	normal	0.00177709	-1.49226	down	0.149018	-1.09092	normal	0.923447	-0.208154	normal	--	--	--	--	--	--	--	Uncharacterized protein TCM_037289 [Theobroma cacao]	--
Gorai.001G023200	3.67588	5.25607	33.204	11.5355	11.0489	3.33786	3.68974	4.11785	15.0112	13.9911	0.180754	1.1194	normal	0.000185551	-1.60781	down	1.64412e-05	2.04437	up	1.30313e-06	1.7269	up	--	--	Biological Process: cell differentiation (GO:0030154);;	--	[S]	Function unknown	Pollen-specific protein SF21 GN=SF21 OS=Helianthus annuus (Common sunflower) PE=2 SV=1	Pollen-specific SF21 [Gossypium arboreum]	--
Gorai.001G024400	190.159	22.9945	109.65	75.9753	69.7058	131.412	12.921	112.39	134.925	174.755	0.00514925	1.60069	up	0.718762	-0.768828	normal	3.33067e-15	3.32774	up	0.861187	0.607184	normal	--	--	Biological Process: respiratory burst involved in defense response (GO:0002679);; Molecular Function: DNA binding (GO:0003677);; Molecular Function: RNA binding (GO:0003723);; Cellular Component: nucleus (GO:0005634);; Cellular Component: cytoplasm (GO:0005737);; Cellular Component: plasma membrane (GO:0005886);; Biological Process: regulation of transcription, DNA-templated (GO:0006355);; Biolog…	--	[R]	General function prediction only	Zinc finger CCCH domain-containing protein 20 GN=At2g19810 OS=Arabidopsis thaliana (Mouse-ear cress) PE=2 SV=1	Zinc finger C-x8-C-x5-C-x3-H type family protein, putative [Theobroma cacao]	--
Gorai.001G024500	24.0514	33.5246	33.6578	19.5114	12.7687	25.3597	35.5313	25.03	33.3434	28.7772	0.723961	-0.677049	normal	0.00485966	-1.3698	down	0.92923	0.0616672	normal	0.949211	0.0786193	normal	[J]	Translation, ribosomal structure and biogenesis	Molecular Function: ATP binding (GO:0005524);; Cellular Component: nucleus (GO:0005634);; Cellular Component: mitochondrion (GO:0005739);; Biological Process: regulation of translational fidelity (GO:0006450);; Cellular Component: chloroplast (GO:0009507);; Cellular Component: glutamyl-tRNA(Gln) amidotransferase complex (GO:0030956);; Biological Process: mitochondrial translation (GO:0032543);; M…	K02435|3.04331e-69|tcc:TCM_037240|C subunit; K02435 aspartyl-tRNA(Asn)/glutamyl-tRNA(Gln) amidotransferase subunit C [EC:6.3.5.6 6.3.5.7] (A)	[YU]	--	Glutamyl-tRNA(Gln) amidotransferase subunit C, chloroplastic/mitochondrial {ECO:0000255|HAMAP-Rule:MF_03149} (Precursor) GN=VIT_04s0008g00570 OS=Vitis vinifera (Grape) PE=3 SV=1	Glutamyl-tRNA (Gln) amidotransferase subunit C, chloroplastic/mitochondrial [Gossypium arboreum]	Aminoacyl-tRNA biosynthesis (ko00970)
Gorai.001G026400	69.8084	87.2849	45.3163	14.6533	14.0802	60.8392	76.571	56.3907	15.0599	21.3849	4.831e-08	-2.58006	down	6.25902e-05	-1.70356	down	2.05285e-07	-2.30565	down	4.24491e-05	-1.40879	down	--	--	--	--	--	--	Lachrymatory-factor synthase (Precursor) GN=LFS OS=Allium cepa (Onion) PE=1 SV=1	Polyketide cyclase/dehydrase and lipid transport superfamily protein, putative [Theobroma cacao]	--
Gorai.001G026700	0.98472	0.340924	1.41289	0.537998	4.30883	1.4971	0.560323	0.627265	0.879048	0.25099	0.926479	0.418017	normal	0.00220534	1.57411	up	0.858137	0.598146	normal	0.772767	-1.2003	normal	[S]	Function unknown	Biological Process: polysaccharide catabolic process (GO:0000272);; Biological Process: regionalization (GO:0003002);; Molecular Function: protein serine/threonine kinase activity (GO:0004674);; Molecular Function: protein binding (GO:0005515);; Molecular Function: ATP binding (GO:0005524);; Cellular Component: endoplasmic reticulum (GO:0005783);; Cellular Component: plasma membrane (GO:0005886);…	--	--	--	Probably inactive leucine-rich repeat receptor-like protein kinase At2g25790 (Precursor) GN=At2g25790 OS=Arabidopsis thaliana (Mouse-ear cress) PE=2 SV=1	Probably inactive leucine-rich repeat receptor-like protein kinase [Theobroma cacao]	--
Gorai.001G026900	2.8661	10.8581	9.14114	4.89895	3.24965	3.528	7.05934	9.83897	8.99195	6.90784	0.123758	-1.18294	normal	0.000418659	-1.60402	down	0.879982	0.345719	normal	0.701531	-0.570821	normal	[DZ]	--	Cellular Component: intracellular part (GO:0044424);;	--	[S]	Function unknown	Ultraviolet-B receptor UVR8 GN=UVR8 OS=Arabidopsis thaliana (Mouse-ear cress) PE=1 SV=1	Regulator of chromosome condensation family protein isoform 2 [Theobroma cacao]	--
Gorai.001G028400	2.30334	10.1732	12.6729	3.87787	1.93719	1.69669	4.01731	8.79264	8.56586	7.29888	0.0270833	-1.41662	normal	9.24983e-11	-2.76966	down	0.149736	1.09826	normal	0.887932	-0.353399	normal	--	--	Biological Process: endonucleolytic cleavage involved in rRNA processing (GO:0000478);; Molecular Function: RNA binding (GO:0003723);; Cellular Component: cell wall (GO:0005618);; Cellular Component: nucleoplasm (GO:0005654);; Cellular Component: cytosol (GO:0005829);; Biological Process: mRNA export from nucleus (GO:0006406);; Biological Process: protein import into nucleus (GO:0006606);; Biolog…	K11090|2.26197e-176|tcc:TCM_047089|RNA recognition motif-containing protein, putative; K11090 lupus La protein (A)	[R]	General function prediction only	La protein 1 GN=LA1 OS=Arabidopsis thaliana (Mouse-ear cress) PE=1 SV=1	RNA recognition motif-containing protein, putative [Theobroma cacao]	--
Gorai.001G028900	7.7723	0.995118	5.08385	5.84625	7.59475	8.77437	0.582919	2.58562	3.15088	7.26682	3.15065e-06	2.46067	up	0.834324	0.456298	normal	3.36809e-05	2.29802	up	0.000116273	1.46865	up	[P]	Inorganic ion transport and metabolism	Cellular Component: Golgi membrane (GO:0000139);; Molecular Function: monooxygenase activity (GO:0004497);; Molecular Function: N,N-dimethylaniline monooxygenase activity (GO:0004499);; Cellular Component: nucleoplasm (GO:0005654);; Cellular Component: endoplasmic reticulum membrane (GO:0005789);; Cellular Component: cytosol (GO:0005829);; Biological Process: defense response (GO:0006952);; Biolo…	K11816|0|tcc:TCM_037137|Flavin-binding monooxygenase family protein; K11816 indole-3-pyruvate monooxygenase [EC:1.14.13.168] (A)	[Q]	Secondary metabolites biosynthesis, transport and catabolism	Indole-3-pyruvate monooxygenase YUCCA6 GN=T14C9.160 OS=Arabidopsis thaliana (Mouse-ear cress) PE=1 SV=1	Flavin-binding monooxygenase family protein [Theobroma cacao]	Tryptophan metabolism (ko00380)
Gorai.001G029700	11.3863	6.58256	7.02344	23.2614	55.3279	7.09285	8.07752	11.8994	16.5557	15.9929	0.000907436	1.77098	up	1.53655e-13	2.85228	up	0.211383	1.02563	normal	0.855786	0.425585	normal	[QR]	--	Cellular Component: mitochondrion (GO:0005739);; Molecular Function: methyltransferase activity (GO:0008168);; Biological Process: methylation (GO:0032259);; Biological Process: response to cadmium ion (GO:0046686);;	--	[R]	General function prediction only	--	Putative methyltransferase [Gossypium arboreum]	--
Gorai.001G029800	15.0312	9.10843	10.6893	20.0874	36.6221	21.9947	14.1854	17.4546	14.249	19.8555	0.174086	1.16517	normal	3.34344e-05	1.72681	up	0.95386	0.0340467	normal	0.970925	0.184369	normal	--	--	Molecular Function: phospholipid binding (GO:0005543);; Biological Process: organelle organization (GO:0006996);; Biological Process: primary metabolic process (GO:0044238);; Biological Process: cellular macromolecule metabolic process (GO:0044260);;	--	--	--	Protein ENHANCED DISEASE RESISTANCE 2-like GN=EDR2L OS=Arabidopsis thaliana (Mouse-ear cress) PE=2 SV=1	Uncharacterized protein isoform 1 [Theobroma cacao]	--
Gorai.001G030800	0.911036	5.64168	4.66913	1.02724	0.208349	6.68498	7.48903	13.6053	4.58046	4.72087	1.97071e-05	-2.3525	down	1.10134e-13	-4.19933	down	0.739929	-0.596764	normal	1.39818e-05	-1.52986	down	--	--	Molecular Function: serine-type carboxypeptidase activity (GO:0004185);; Cellular Component: lysosome (GO:0005764);; Biological Process: proteolysis (GO:0006508);; Biological Process: glucosinolate biosynthetic process (GO:0019761);;	K01285|0|tcc:TCM_037095|Alpha/beta-Hydrolases superfamily protein isoform 1; K01285 lysosomal Pro-X carboxypeptidase [EC:3.4.16.2] (A)	[OR]	--	Probable serine protease EDA2 (Precursor) GN=EDA2 OS=Arabidopsis thaliana (Mouse-ear cress) PE=2 SV=2	Lysosomal Pro-X carboxypeptidase [Gossypium arboreum]	--
Gorai.001G031100	414.43	67.2447	184.452	261.811	457.44	271.821	156.694	108.677	95.2772	152.373	0.000119987	1.97121	up	0.0225863	1.29379	normal	0.868923	-0.646361	normal	0.902591	0.503393	normal	[M]	Cell wall/membrane/envelope biogenesis	Molecular Function: transporter activity (GO:0005215);; Biological Process: transport (GO:0006810);;	K03098|4.11506e-101|tcc:TCM_037092|Temperature-induced lipocalin; K03098 apolipoprotein D and lipocalin family protein (A)	[M]	Cell wall/membrane/envelope biogenesis	--	temperature-induced lipocalin&apos; [Gossypium arboreum]	--
Gorai.001G031700	223.007	7.45504	92.4428	95.0303	144.797	94.0754	13.887	6.96238	17.3475	42.0889	1.33227e-15	3.67846	up	0.919266	0.628335	normal	0.911718	0.354496	normal	0	2.56808	up	[C]	Energy production and conversion	Molecular Function: 3-chloroallyl aldehyde dehydrogenase activity (GO:0004028);; Molecular Function: binding (GO:0005488);; Cellular Component: cytosol (GO:0005829);; Biological Process: response to stress (GO:0006950);; Molecular Function: glyceraldehyde-3-phosphate dehydrogenase (NADP+) (non-phosphorylating) activity (GO:0008886);; Cellular Component: plastid (GO:0009536);; Biological Process: …	K00131|0|tcc:TCM_037078|Aldehyde dehydrogenase 11A3 isoform 1; K00131 glyceraldehyde-3-phosphate dehydrogenase (NADP+) [EC:1.2.1.9] (A)	[C]	Energy production and conversion	NADP-dependent glyceraldehyde-3-phosphate dehydrogenase GN=GAPN OS=Nicotiana plumbaginifolia (Leadwort-leaved tobacco) PE=2 SV=1	NADP-dependent glyceraldehyde-3-phosphate dehydrogenase [Gossypium arboreum]	Glycolysis / Gluconeogenesis (ko00010);; Pentose phosphate pathway (ko00030);; Carbon metabolism (ko01200)
Gorai.001G031900	5.92855	5.25546	9.24263	1.64515	2.3265	5.4708	3.68405	3.50811	1.28645	2.46462	0.0347249	-1.65571	normal	0.000653133	-1.75004	down	0.553808	-0.925507	normal	0.489835	-0.943263	normal	--	--	--	--	--	--	--	--	--
Gorai.001G032100	0.0274186	0.952003	0.106828	0	0.0568672	0.0323306	0.302354	0	0.117949	0	0.000130464	-3.80694	down	--	--	--	--	--	--	--	--	--	--	--	Molecular Function: protein serine/threonine kinase activity (GO:0004674);; Molecular Function: transmembrane receptor protein tyrosine kinase activity (GO:0004714);; Molecular Function: phosphoprotein phosphatase activity (GO:0004721);; Molecular Function: protein binding (GO:0005515);; Molecular Function: ATP binding (GO:0005524);; Cellular Component: vacuole (GO:0005773);; Cellular Component: …	--	--	--	Probable LRR receptor-like serine/threonine-protein kinase At2g24230 (Precursor) GN=At2g24230 OS=Arabidopsis thaliana (Mouse-ear cress) PE=2 SV=1	Leucine-rich repeat protein kinase family protein [Theobroma cacao]	--
Gorai.001G032300	0.316171	2.15427	1.67997	0.418363	0.500331	0.403151	0.959389	1.23632	1.63074	0.489344	0.00139312	-2.15428	down	0.0223902	-1.67279	normal	0.630409	0.83819	normal	0.313754	-1.25677	normal	[E]	Amino acid transport and metabolism	Molecular Function: aminopeptidase activity (GO:0004177);; Cellular Component: cytoplasm (GO:0005737);; Cellular Component: vacuole (GO:0005773);; Cellular Component: cytosol (GO:0005829);; Biological Process: gluconeogenesis (GO:0006094);; Biological Process: glycolytic process (GO:0006096);; Biological Process: proteolysis (GO:0006508);; Biological Process: protein targeting to vacuole (GO:0006…	K01255|0|tcc:TCM_037054|Cytosol aminopeptidase family protein; K01255 leucyl aminopeptidase [EC:3.4.11.1] (A)	[R]	General function prediction only	Leucine aminopeptidase 3, chloroplastic (Precursor) GN=At4g30920 OS=Arabidopsis thaliana (Mouse-ear cress) PE=2 SV=2	hypothetical protein F383_10344 [Gossypium arboreum]	Glutathione metabolism (ko00480)
Gorai.001G032600	2.83272	8.88834	9.09847	4.34079	2.26688	4.53101	2.78256	1.84367	6.53631	7.79385	0.34121	-0.981668	normal	1.34043e-05	-1.95921	down	0.0593305	1.26561	normal	2.29286e-07	1.99445	up	--	--	Molecular Function: serine-type carboxypeptidase activity (GO:0004185);; Cellular Component: extracellular space (GO:0005615);; Cellular Component: vacuole (GO:0005773);; Biological Process: proteolysis (GO:0006508);; Biological Process: microtubule nucleation (GO:0007020);; Biological Process: brassinosteroid mediated signaling pathway (GO:0009742);; Biological Process: second-messenger-mediated…	K16297|0|tcc:TCM_037034|Alpha/beta-Hydrolases superfamily protein; K16297 serine carboxypeptidase-like clade II [EC:3.4.16.-] (A)	[OE]	--	Serine carboxypeptidase 24 chain B (Precursor) GN=F17I23.50 OS=Arabidopsis thaliana (Mouse-ear cress) PE=1 SV=1	Serine carboxypeptidase 24 -like protein [Gossypium arboreum]	--
Gorai.001G033200	11.3596	1.59862	4.68789	5.06628	15.5793	3.95122	0.716669	0.144219	0.196481	1.95399	0.0469809	1.54802	normal	0.000645672	1.61168	up	--	--	--	0.000886864	3.03122	up	--	--	Molecular Function: DNA binding (GO:0003677);; Molecular Function: sequence-specific DNA binding transcription factor activity (GO:0003700);; Cellular Component: nucleus (GO:0005634);; Biological Process: regulation of transcription, DNA-templated (GO:0006355);; Biological Process: mRNA export from nucleus (GO:0006406);; Biological Process: oligopeptide transport (GO:0006857);; Biological Process…	--	--	--	Ethylene-responsive transcription factor SHINE 3 GN=F18G18.130 OS=Arabidopsis thaliana (Mouse-ear cress) PE=2 SV=1	Ethylene-responsive transcription factor SHINE 3 -like protein [Gossypium arboreum]	--
Gorai.001G034500	56.0916	17.4085	50.8965	59.3321	60.4519	85.1257	12.3192	51.9322	16.3452	39.5084	0.000650019	1.82458	up	0.975558	0.301748	normal	0.868557	0.541882	normal	0.964917	-0.38771	normal	--	--	Biological Process: response to reactive oxygen species (GO:0000302);; Molecular Function: binding (GO:0005488);; Biological Process: cell cycle (GO:0007049);; Biological Process: post-embryonic development (GO:0009791);; Biological Process: response to iron ion (GO:0010039);; Molecular Function: ligase activity (GO:0016874);; Cellular Component: nuclear lumen (GO:0031981);; Biological Process: p…	--	--	--	Putative WEB family protein At1g65010, chloroplastic (Precursor) GN=At1g65010 OS=Arabidopsis thaliana (Mouse-ear cress) PE=1 SV=1	hypothetical protein F383_01593 [Gossypium arboreum]	--
Gorai.001G035600	26.2839	20.7066	11.177	2.79635	1.16744	34.5616	8.79877	8.63476	5.73085	4.52364	1.12442e-08	-2.89213	down	2.2126e-10	-3.11657	down	0.77642	-0.53798	normal	0.227541	-0.9205	normal	--	--	--	--	--	--	--	conserved hypothetical protein [Ricinus communis]	--
Gorai.001G036500	1.11767	2.14118	0.803318	0.10042	0.153249	1.0305	3.87594	0.263119	0.237056	0	0.00267726	-3.13267	down	--	--	--	2.86436e-05	-3.21982	down	--	--	--	--	--	Biological Process: MAPK cascade (GO:0000165);; Biological Process: respiratory burst involved in defense response (GO:0002679);; Molecular Function: DNA binding (GO:0003677);; Molecular Function: sequence-specific DNA binding transcription factor activity (GO:0003700);; Molecular Function: protein binding (GO:0005515);; Cellular Component: nucleus (GO:0005634);; Cellular Component: plasma membra…	--	--	--	Ethylene-responsive transcription factor ERF003 GN=ERF003 OS=Arabidopsis thaliana (Mouse-ear cress) PE=2 SV=1	pathogenesis-related transcriptional factor ERF [Gossypium barbadense]	--
Gorai.001G037700	15.58	14.6787	6.82723	4.36053	1.23778	3.38293	44.9664	12.2935	1.3753	0.599879	0.00136303	-1.75241	down	5.86576e-07	-2.39727	down	0	-4.91217	down	0	-4.18293	down	--	--	Biological Process: response to molecule of bacterial origin (GO:0002237);; Molecular Function: sequence-specific DNA binding transcription factor activity (GO:0003700);; Molecular Function: protein binding (GO:0005515);; Cellular Component: nucleus (GO:0005634);; Biological Process: ion transport (GO:0006811);; Biological Process: defense response (GO:0006952);; Biological Process: response to o…	--	--	--	WRKY transcription factor 18 GN=WRKY18 OS=Arabidopsis thaliana (Mouse-ear cress) PE=1 SV=2	WRKY transcription factor 51 [Gossypium hirsutum]	--
Gorai.001G037800	3.6729	17.9076	5.37365	2.91865	1.16193	1.14296	57.7817	17.2752	2.67707	0.834826	6.56234e-07	-2.59316	down	0.000829496	-2.09779	down	0	-4.34478	down	0	-4.20411	down	--	--	Biological Process: transition metal ion transport (GO:0000041);; Biological Process: MAPK cascade (GO:0000165);; Biological Process: response to molecule of bacterial origin (GO:0002237);; Biological Process: respiratory burst involved in defense response (GO:0002679);; Molecular Function: sequence-specific DNA binding transcription factor activity (GO:0003700);; Molecular Function: protein bind…	--	--	--	WRKY transcription factor 18 GN=WRKY18 OS=Arabidopsis thaliana (Mouse-ear cress) PE=1 SV=2	WRKY52 [Gossypium aridum]	--
Gorai.001G039100	54.7883	15.9374	31.1087	73.3814	53.9151	43.8076	12.8212	17.7006	25.5629	28.7339	6.72797e-06	2.18943	up	0.715304	0.727033	normal	0.283741	0.995062	normal	0.535565	0.677887	normal	[M]	Cell wall/membrane/envelope biogenesis	Cellular Component: mitochondrion (GO:0005739);; Biological Process: fatty acid metabolic process (GO:0006631);; Biological Process: response to wounding (GO:0009611);; Biological Process: response to fungus (GO:0009620);; Biological Process: jasmonic acid biosynthetic process (GO:0009695);; Cellular Component: chloroplast inner membrane (GO:0009706);; Cellular Component: chloroplast outer membra…	K03715|0|tcc:TCM_036877|Monogalactosyl diacylglycerol synthase 1; K03715 1,2-diacylglycerol 3-beta-galactosyltransferase [EC:2.4.1.46] (A)	--	--	Monogalactosyldiacylglycerol synthase, chloroplastic (Precursor) OS=Cucumis sativus (Cucumber) PE=1 SV=1	Monogalactosyldiacylglycerol synthase 1, chloroplastic -like protein [Gossypium arboreum]	Glycerolipid metabolism (ko00561)
Gorai.001G040900	5.15046	16.9103	5.04618	5.21416	5.36242	2.55768	42.4035	2.2452	5.1964	5.28596	0.00244822	-1.67041	down	0.909544	0.0916548	normal	9.96137e-12	-2.95367	down	0.0190116	1.20551	normal	[M]	Cell wall/membrane/envelope biogenesis	Biological Process: nitrogen compound metabolic process (GO:0006807);; Molecular Function: racemase and epimerase activity, acting on amino acids and derivatives (GO:0016855);;	--	--	--	--	putative amino-acid racemase [Gossypium arboreum]	--
Gorai.001G041300	9.72033	5.17109	4.91249	7.13631	13.5709	8.36148	6.57251	5.65793	4.60654	5.67343	0.837066	0.453439	normal	0.0029968	1.40514	up	0.809144	-0.495325	normal	0.943271	-0.0231934	normal	--	--	Cellular Component: cytoplasm (GO:0005737);; Biological Process: cell communication (GO:0007154);; Biological Process: response to chemical (GO:0042221);; Cellular Component: intracellular membrane-bounded organelle (GO:0043231);; Biological Process: cellular response to stimulus (GO:0051716);; Biological Process: biological regulation (GO:0065007);;	--	[R]	General function prediction only	F-box/kelch-repeat protein At1g55270 GN=At1g55270 OS=Arabidopsis thaliana (Mouse-ear cress) PE=2 SV=1	hypothetical protein F383_18309 [Gossypium arboreum]	--
Gorai.001G041500	104.762	8.21129	45.7256	62.0084	128.859	100.755	15.5826	19.9529	34.6622	77.4837	3.83811e-10	2.89641	up	0.00216898	1.45739	up	0.101151	1.16886	normal	1.56413e-10	1.93518	up	--	--	Molecular Function: ATP transmembrane transporter activity (GO:0005347);; Cellular Component: mitochondrial inner membrane (GO:0005743);; Biological Process: glucose catabolic process (GO:0006007);; Biological Process: protein targeting to membrane (GO:0006612);; Biological Process: transport (GO:0006810);; Biological Process: mitochondrial transport (GO:0006839);; Biological Process: ER to Golgi…	K14684|0|tcc:TCM_038056|Mitochondrial substrate carrier family protein; K14684 solute carrier family 25 (mitochondrial phosphate transporter), member 23/24/25/41 (A)	[C]	Energy production and conversion	Adenine nucleotide transporter BT1, chloroplastic/mitochondrial (Precursor) GN=F8B4.100 OS=Arabidopsis thaliana (Mouse-ear cress) PE=1 SV=1	Protein brittle-1, chloroplastic/amyloplastic [Gossypium arboreum]	--
Gorai.001G041900	11.6621	6.70791	10.8621	49.2934	25.8466	29.8406	4.80122	9.36228	13.386	18.5241	1.14778e-09	2.82598	up	0.0376184	1.16432	normal	0.00669322	1.45831	up	0.0453269	0.95619	normal	[E]	Amino acid transport and metabolism	Molecular Function: transporter activity (GO:0005215);; Molecular Function: protein binding (GO:0005515);; Cellular Component: Golgi apparatus (GO:0005794);; Cellular Component: plasma membrane (GO:0005886);; Biological Process: oligopeptide transport (GO:0006857);; Biological Process: response to water deprivation (GO:0009414);; Cellular Component: plasmodesma (GO:0009506);; Biological Process: …	--	[E]	Amino acid transport and metabolism	Protein NRT1/ PTR FAMILY 6.2 GN=F18A8.6 OS=Arabidopsis thaliana (Mouse-ear cress) PE=1 SV=1	Major facilitator superfamily protein isoform 2 [Theobroma cacao]	--
Gorai.001G042100	19.784	4.10001	3.37349	19.7068	6.94578	13.4985	6.04719	2.33491	1.36429	0.939103	8.76127e-06	2.22576	up	0.28466	0.952416	normal	0.000230067	-2.06111	down	0.209526	-1.30552	normal	--	--	Cellular Component: nucleus (GO:0005634);; Biological Process: phosphate ion transport (GO:0006817);; Biological Process: galactolipid biosynthetic process (GO:0019375);; Biological Process: negative regulation of transcription, DNA-templated (GO:0045892);; Biological Process: cellular response to cold (GO:0070417);; Biological Process: positive regulation of cellular response to phosphate starva…	--	[P]	Inorganic ion transport and metabolism	SPX domain-containing protein 2 GN=SPX2 OS=Arabidopsis thaliana (Mouse-ear cress) PE=2 SV=1	SPX domain-containing 2 -like protein [Gossypium arboreum]	--
Gorai.001G042300	25.0085	47.7742	70.486	19.6869	3.37859	16.7594	16.5833	7.37758	48.4116	38.1933	0.0760841	-1.2694	normal	0	-4.36509	down	0.00171077	1.58158	up	2.03726e-13	2.35482	up	--	--	Molecular Function: DNA binding (GO:0003677);; Molecular Function: sequence-specific DNA binding transcription factor activity (GO:0003700);; Cellular Component: nucleus (GO:0005634);; Biological Process: regulation of transcription, DNA-templated (GO:0006355);; Biological Process: mRNA export from nucleus (GO:0006406);; Biological Process: defense response (GO:0006952);; Biological Process: pyri…	--	--	--	Ethylene-responsive transcription factor WIN1 GN=F9L1.31 OS=Arabidopsis thaliana (Mouse-ear cress) PE=2 SV=1	Integrase-type DNA-binding superfamily protein [Theobroma cacao]	--
Gorai.001G042600	4.75684	2.4229	4.04642	9.12109	11.771	3.44295	6.51407	4.29841	4.73442	3.39097	0.000324893	1.89045	up	0.00096559	1.50314	up	0.851714	-0.41113	normal	0.889879	-0.34326	normal	--	--	Molecular Function: ubiquitin-protein transferase activity (GO:0004842);; Molecular Function: protein binding (GO:0005515);; Cellular Component: nucleus (GO:0005634);; Biological Process: ubiquitin-dependent protein catabolic process (GO:0006511);; Biological Process: response to ethylene (GO:0009723);; Biological Process: negative regulation of ethylene-activated signaling pathway (GO:0010105);;…	K14515|0|tcc:TCM_038093|Ein3-binding f-box protein 4; K14515 EIN3-binding F-box protein (A)	[R]	General function prediction only	EIN3-binding F-box protein 1 GN=F13B15.15 OS=Arabidopsis thaliana (Mouse-ear cress) PE=1 SV=1	EIN3-binding F-box 1 -like protein [Gossypium arboreum]	Plant hormone signal transduction (ko04075)
Gorai.001G042700	24.5916	21.6029	33.8819	14.0117	13.2865	28.8717	11.2171	24.7069	19.6362	20.111	0.770846	-0.606245	normal	0.00951154	-1.29502	down	0.426272	0.868497	normal	0.858114	-0.432317	normal	--	--	Molecular Function: sequence-specific DNA binding transcription factor activity (GO:0003700);; Molecular Function: protein binding (GO:0005515);; Cellular Component: nucleus (GO:0005634);; Biological Process: chromatin assembly or disassembly (GO:0006333);; Biological Process: regulation of translation (GO:0006417);; Biological Process: plastid organization (GO:0009657);; Biological Process: resp…	--	--	--	Axial regulator YABBY 5 GN=YAB5 OS=Arabidopsis thaliana (Mouse-ear cress) PE=2 SV=1	Plant-specific transcription factor YABBY family protein isoform 1 [Theobroma cacao]	--
Gorai.001G043900	16.9889	3.42123	11.0039	19.5366	47.0066	9.34901	1.36095	2.77793	5.86436	38.5962	3.00554e-06	2.34227	up	9.95641e-06	1.81581	up	0.00227968	1.82404	up	0	3.7762	up	--	--	Biological Process: gravitropism (GO:0009630);; Biological Process: response to auxin (GO:0009733);; Biological Process: somatic embryogenesis (GO:0010262);; Biological Process: gene expression (GO:0010467);; Biological Process: response to organic cyclic compound (GO:0014070);; Biological Process: cellular macromolecule biosynthetic process (GO:0034645);; Biological Process: primary metabolic pr…	K14484|4.29181e-79|tcc:TCM_038129|AUX/IAA transcriptional regulator family protein, putative isoform 1; K14484 auxin-responsive protein IAA (A)	--	--	Auxin-responsive protein IAA29 GN=IAA29 OS=Arabidopsis thaliana (Mouse-ear cress) PE=2 SV=2	auxin-responsive IAA29-like protein [Gossypium hirsutum]	Plant hormone signal transduction (ko04075)
Gorai.001G045200	32.4974	41.3179	55.4899	3.88628	6.99092	85.4496	68.0808	57.3302	30.7258	35.5541	6.27498e-13	-3.37457	down	6.66134e-16	-3.06662	down	0.141645	-1.16216	normal	0.575156	-0.696525	normal	--	--	Cellular Component: plant-type cell wall (GO:0009505);; Biological Process: response to karrikin (GO:0080167);;	--	--	--	--	putative e3 ubiquitin-protein ligase hul4 [Gossypium arboreum]	--
Gorai.001G046000	1.69388	27.5374	9.41856	5.04353	1.41247	0.458319	13.58	3.58977	5.21265	3.27278	3.37173e-07	-2.43754	down	1.76161e-10	-2.70668	down	0.0185759	-1.354	normal	0.92261	-0.213005	normal	[S]	Function unknown	Cellular Component: chloroplast (GO:0009507);; Biological Process: plastid organization (GO:0009657);; Biological Process: gene expression (GO:0010467);; Biological Process: RNA metabolic process (GO:0016070);; Biological Process: primary metabolic process (GO:0044238);; Biological Process: cellular macromolecule metabolic process (GO:0044260);; Biological Process: cellular component organization…	--	--	--	Protein CHUP1, chloroplastic GN=CHUP1 OS=Arabidopsis thaliana (Mouse-ear cress) PE=1 SV=1	Actin binding-like protein [Theobroma cacao]	--
Gorai.001G046100	8.38433	20.5022	18.4175	15.3793	7.15131	5.32737	19.8262	21.763	14.562	11.0994	0.811024	-0.533521	normal	0.00416393	-1.41532	down	0.877708	-0.349101	normal	0.058556	-0.959824	normal	--	--	Biological Process: rRNA processing (GO:0006364);; Cellular Component: chloroplast thylakoid (GO:0009534);; Biological Process: photosynthetic electron transport in photosystem I (GO:0009773);; Biological Process: chloroplast relocation (GO:0009902);; Biological Process: thylakoid membrane organization (GO:0010027);; Biological Process: photosystem II assembly (GO:0010207);; Biological Process: r…	--	[O]	Posttranslational modification, protein turnover, chaperones	Protein LOW PSII ACCUMULATION 2, chloroplastic (Precursor) GN=LPA2 OS=Arabidopsis thaliana (Mouse-ear cress) PE=1 SV=1	hypothetical protein F383_19288 [Gossypium arboreum]	--
Gorai.001G046600	9.05426	11.5406	15.5814	45.0126	34.8282	25.0837	11.4624	22.2264	53.9699	47.9408	8.57456e-05	1.97305	up	0.0741044	1.09594	normal	2.87121e-07	2.25082	up	0.00492367	1.11165	up	--	--	Biological Process: RNA methylation (GO:0001510);; Cellular Component: nucleus (GO:0005634);; Biological Process: protein import into nucleus (GO:0006606);; Biological Process: protein targeting to mitochondrion (GO:0006626);;	K14823|5.52787e-115|tcc:TCM_014985|RRNA processing protein-related; K14823 rRNA-processing protein EBP2 (A)	[A]	RNA processing and modification	Probable rRNA-processing protein EBP2 homolog GN=At3g22660 OS=Arabidopsis thaliana (Mouse-ear cress) PE=2 SV=1	hypothetical protein F383_14162 [Gossypium arboreum]	--
Gorai.001G048500	196.48	29.4199	26.7511	90.6623	43.6959	174.607	40.7128	28.3122	6.17807	5.62862	0.00629661	1.61359	up	0.824019	0.634863	normal	1.07985e-09	-2.63955	down	9.34808e-14	-2.28647	down	[O]	Posttranslational modification, protein turnover, chaperones	Molecular Function: ubiquitin-protein transferase activity (GO:0004842);; Molecular Function: protein binding (GO:0005515);; Cellular Component: plasma membrane (GO:0005886);; Molecular Function: zinc ion binding (GO:0008270);; Biological Process: response to salt stress (GO:0009651);; Biological Process: abscisic acid metabolic process (GO:0009687);; Biological Process: response to gibberellin (…	K10636|0|tcc:TCM_014930|RPM1 interacting protein 2 isoform 1; K10636 autocrine motility factor receptor [EC:6.3.2.19] (A)	[O]	Posttranslational modification, protein turnover, chaperones	E3 ubiquitin protein ligase RIN2 GN=F24A6.70 OS=Arabidopsis thaliana (Mouse-ear cress) PE=1 SV=1	E3 ubiquitin protein ligase RIN2 [Gossypium arboreum]	Protein processing in endoplasmic reticulum (ko04141)
Gorai.001G051200	55.9838	19.2726	13.3709	56.1913	40.9096	37.2289	11.1783	52.6029	17.8792	28.6656	0.011036	1.50365	normal	0.000153093	1.63231	up	0.581172	0.759635	normal	0.129085	-0.864807	normal	--	--	Biological Process: respiratory burst involved in defense response (GO:0002679);; Molecular Function: DNA binding (GO:0003677);; Molecular Function: sequence-specific DNA binding transcription factor activity (GO:0003700);; Molecular Function: protein binding (GO:0005515);; Cellular Component: nucleolus (GO:0005730);; Biological Process: toxin catabolic process (GO:0009407);; Biological Process: …	--	--	--	Ethylene-responsive transcription factor ERF105 GN=ERF105 OS=Arabidopsis thaliana (Mouse-ear cress) PE=2 SV=1	AP2/ERF domain-containing transcription factor, putative isoform 2 [Theobroma cacao]	--
Gorai.001G051700	0.064646	0.0611009	0	1.26862	1.77062	0.0756586	0	0.0759916	1.42113	1.71949	0.0345335	3.06869	normal	0.000591851	3.67183	up	0.0063696	3.31453	up	0.00219344	3.21538	up	[R]	General function prediction only	Biological Process: response to stress (GO:0006950);; Biological Process: response to abiotic stimulus (GO:0009628);; Biological Process: phenylpropanoid biosynthetic process (GO:0009699);; Biological Process: response to hormone (GO:0009725);; Biological Process: post-embryonic development (GO:0009791);; Biological Process: flavonoid biosynthetic process (GO:0009813);; Biological Process: respon…	--	[QR]	--	Protein SRG1 GN=SRG1 OS=Arabidopsis thaliana (Mouse-ear cress) PE=2 SV=1	oxidoreductase family protein [Populus trichocarpa]	--
Gorai.001G052000	0.405757	1.5513	0.945159	0.353117	0.316281	0.712168	1.65191	0.681339	0.345788	0.569792	0.00315318	-2.01588	down	0.109619	-1.51049	normal	0.00114032	-2.06248	down	0.950054	-0.231022	normal	[L]	Replication, recombination and repair	Molecular Function: DNA binding (GO:0003677);; Molecular Function: DNA (cytosine-5-)-methyltransferase activity (GO:0003886);; Cellular Component: nucleus (GO:0005634);; Biological Process: DNA methylation (GO:0006306);; Biological Process: transcription, DNA-templated (GO:0006351);; Biological Process: post-embryonic development (GO:0009791);; Biological Process: chromatin modification (GO:00165…	K00558|0|tcc:TCM_040279|Chromomethylase 1, putative isoform 1; K00558 DNA (cytosine-5)-methyltransferase 1 [EC:2.1.1.37] (A)	--	--	DNA (cytosine-5)-methyltransferase CMT3 GN=CMT3 OS=Arabidopsis thaliana (Mouse-ear cress) PE=1 SV=2	chromomethylase 3 [Gossypium hirsutum]	Cysteine and methionine metabolism (ko00270)
Gorai.001G052700	84.6582	208.489	218.833	102.229	81.1076	222.499	242.504	251.519	250.46	205.348	0.648789	-0.988622	normal	0.00328007	-1.43311	down	0.988308	0.0777416	normal	0.987131	-0.316783	normal	[P]	Inorganic ion transport and metabolism	Molecular Function: superoxide dismutase activity (GO:0004784);; Molecular Function: protein binding (GO:0005515);; Biological Process: rRNA processing (GO:0006364);; Biological Process: tRNA metabolic process (GO:0006399);; Biological Process: superoxide metabolic process (GO:0006801);; Biological Process: response to UV (GO:0009411);; Cellular Component: thylakoid (GO:0009579);; Biological Proc…	--	[P]	Inorganic ion transport and metabolism	Superoxide dismutase [Fe] 2, chloroplastic (Precursor) GN=MWD22.4 OS=Arabidopsis thaliana (Mouse-ear cress) PE=1 SV=1	Superoxide dismutase [Fe], chloroplastic [Gossypium arboreum]	--
Gorai.001G052900	0.775972	0.628794	0.835425	2.1739	3.26789	0.761992	0.448474	0.888418	2.21399	3.15897	0.0171747	1.71059	normal	0.000213607	1.93333	up	0.000199849	2.25774	up	8.37224e-05	1.79068	up	--	--	Cellular Component: nucleus (GO:0005634);; Biological Process: lipid metabolic process (GO:0006629);; Biological Process: negative regulation of flower development (GO:0009910);; Biological Process: vernalization response (GO:0010048);; Biological Process: vegetative to reproductive phase transition of meristem (GO:0010228);; Biological Process: regulation of vegetative phase change (GO:0010321);…	--	--	--	Protein FRIGIDA GN=FRI OS=Arabidopsis thaliana (Mouse-ear cress) PE=1 SV=1	FRIGIDA-like protein, putative [Theobroma cacao]	--
Gorai.001G053200	10.3376	4.5015	8.70745	9.56576	21.705	22.9811	6.64673	6.37473	8.72318	21.5136	0.433196	1.00672	normal	0.00822699	1.41155	up	0.82084	0.48335	normal	2.8061e-05	1.70078	up	--	--	--	--	--	--	--	hypothetical protein L484_015527 [Morus notabilis]	--
Gorai.001G054400	94.4514	110.906	166.046	80.8682	64.1188	123.89	78.8061	122.102	118.073	114.43	0.93425	-0.52445	normal	0.00142511	-1.48205	down	0.921805	0.558408	normal	0.988118	-0.100243	normal	[H]	Coenzyme transport and metabolism	Biological Process: rRNA processing (GO:0006364);; Cellular Component: chloroplast thylakoid membrane (GO:0009535);; Cellular Component: chloroplast envelope (GO:0009941);; Biological Process: regulation of proton transport (GO:0010155);; Biological Process: photosynthesis (GO:0015979);; Biological Process: chlorophyll biosynthetic process (GO:0015995);; Biological Process: isopentenyl diphosphat…	K03428|0|tcc:TCM_014750|Magnesium-protoporphyrin IX methyltransferase isoform 1; K03428 magnesium-protoporphyrin O-methyltransferase [EC:2.1.1.11] (A)	[H]	Coenzyme transport and metabolism	Magnesium protoporphyrin IX methyltransferase, chloroplastic (Precursor) GN=CHLM OS=Arabidopsis thaliana (Mouse-ear cress) PE=1 SV=1	Magnesium-protoporphyrin O-methyltransferase [Gossypium arboreum]	Porphyrin and chlorophyll metabolism (ko00860)
Gorai.001G054800	2.68113	0.724624	0.404269	1.43383	3.94825	1.28204	6.08372	1.5464	0.343335	0.57057	0.86194	0.815463	normal	1.40474e-05	2.87887	up	6.40707e-09	-3.66834	down	0.687555	-1.33928	normal	--	--	Molecular Function: adenine nucleotide transmembrane transporter activity (GO:0000295);; Molecular Function: purine ribonucleotide transmembrane transporter activity (GO:0005346);; Cellular Component: cell wall (GO:0005618);; Cellular Component: mitochondrion (GO:0005739);; Cellular Component: mitochondrial inner membrane (GO:0005743);; Cellular Component: vacuolar membrane (GO:0005774);; Cellula…	K15102|0|tcc:TCM_014732|Phosphate transporter 3,1; K15102 solute carrier family 25 (mitochondrial phosphate transporter), member 3 (A)	[C]	Energy production and conversion	Mitochondrial phosphate carrier protein 3, mitochondrial (Precursor) GN=MUA22_4 OS=Arabidopsis thaliana (Mouse-ear cress) PE=1 SV=1	Phosphate transporter 3,1 [Theobroma cacao]	--
Gorai.001G055700	121.233	24.1014	62.0115	92.4524	121.098	83.8205	27.0637	76.7217	44.4458	94.583	0.000194438	1.90037	up	0.319669	0.926638	normal	0.631571	0.749734	normal	0.961154	0.26737	normal	--	--	Molecular Function: protein binding (GO:0005515);; Cellular Component: integral component of plasma membrane (GO:0005887);; Biological Process: transport (GO:0006810);; Biological Process: calcium ion transport (GO:0006816);; Biological Process: copper ion transport (GO:0006825);; Biological Process: Golgi organization (GO:0007030);; Molecular Function: sucrose transmembrane transporter activity …	K15382|4.92522e-130|tcc:TCM_014707|Nodulin MtN3 family protein, putative isoform 1; K15382 solute carrier family 50 (sugar transporter) (A)	[R]	General function prediction only	Bidirectional sugar transporter SWEET10 GN=SWEET10 OS=Arabidopsis thaliana (Mouse-ear cress) PE=2 SV=1	Nodulin MtN3 family protein, putative isoform 1 [Theobroma cacao]	--
Gorai.001G055800	107.404	207.853	245.35	97.2075	80.4593	133.865	140.872	172.57	139.962	126.463	0.519537	-1.08716	normal	0.000101886	-1.68969	down	0.985884	0.00242149	normal	0.962312	-0.471823	normal	[H]	Coenzyme transport and metabolism	Biological Process: pentose-phosphate shunt (GO:0006098);; Biological Process: rRNA processing (GO:0006364);; Biological Process: arginine metabolic process (GO:0006525);; Biological Process: protoporphyrinogen IX biosynthetic process (GO:0006782);; Biological Process: defense response (GO:0006952);; Molecular Function: transaminase activity (GO:0008483);; Biological Process: aromatic amino acid …	K01845|0|tcc:TCM_014701|Glutamate-1-semialdehyde 2,1-aminomutase 2; K01845 glutamate-1-semialdehyde 2,1-aminomutase [EC:5.4.3.8] (A)	[E]	Amino acid transport and metabolism	Glutamate-1-semialdehyde 2,1-aminomutase 2, chloroplastic (Precursor) GN=T8P19.240 OS=Arabidopsis thaliana (Mouse-ear cress) PE=2 SV=2	Glutamate-1-semialdehyde 2,1-aminomutase 2, chloroplastic -like protein [Gossypium arboreum]	Porphyrin and chlorophyll metabolism (ko00860)
Gorai.001G057100	17.4923	37.0646	18.7121	10.8747	9.57003	29.2598	32.5497	4.07505	32.1977	12.6582	0.000519704	-1.81394	down	0.0533263	-1.12179	normal	0.956611	-0.0285931	normal	6.88565e-06	1.6201	up	[M]	Cell wall/membrane/envelope biogenesis	Cellular Component: chromatin (GO:0000785);; Molecular Function: protein binding (GO:0005515);; Cellular Component: nucleus (GO:0005634);; Cellular Component: plasma membrane (GO:0005886);; Biological Process: DNA metabolic process (GO:0006259);; Biological Process: regulation of transcription, DNA-templated (GO:0006355);; Cellular Component: plasmodesma (GO:0009506);; Cellular Component: chlorop…	--	[P]	Inorganic ion transport and metabolism	Heavy metal-associated isoprenylated plant protein 26 (Precursor) GN=F20M13.140 OS=Arabidopsis thaliana (Mouse-ear cress) PE=1 SV=1	superoxide dismutase 1 copper chaperone [Gossypium arboreum]	--
Gorai.001G058500	33.4876	69.0252	41.3816	21.8803	18.5553	49.8049	55.7928	48.6641	40.2107	38.6448	0.00121223	-1.73863	down	0.0137726	-1.25625	normal	0.901496	-0.48562	normal	0.933476	-0.361894	normal	--	--	Molecular Function: DNA binding (GO:0003677);; Molecular Function: sequence-specific DNA binding transcription factor activity (GO:0003700);; Molecular Function: protein binding (GO:0005515);; Cellular Component: cytosol (GO:0005829);; Biological Process: regulation of transcription, DNA-templated (GO:0006355);; Biological Process: abscisic acid-activated signaling pathway (GO:0009738);; Cellular…	--	[K]	Transcription	Nuclear transcription factor Y subunit C-1 GN=T8P19.100 OS=Arabidopsis thaliana (Mouse-ear cress) PE=1 SV=1	Nuclear transcription factor Y subunit C-1 -like protein [Gossypium arboreum]	--
Gorai.001G060300	3.8173	13.2722	12.0374	5.13328	2.84116	5.27042	12.1174	11.0572	8.55077	8.71998	0.0488616	-1.34728	normal	1.08115e-05	-2.04416	down	0.839783	-0.413145	normal	0.877996	-0.372236	normal	[F]	Nucleotide transport and metabolism	Molecular Function: adenylate kinase activity (GO:0004017);; Molecular Function: copper ion binding (GO:0005507);; Molecular Function: ATP binding (GO:0005524);; Cellular Component: nucleus (GO:0005634);; Cellular Component: mitochondrion (GO:0005739);; Cellular Component: vacuolar membrane (GO:0005774);; Cellular Component: Golgi apparatus (GO:0005794);; Cellular Component: plasma membrane (GO:0…	K00939|2.03018e-162|tcc:TCM_014604|Adenylate kinase 1 isoform 1; K00939 adenylate kinase [EC:2.7.4.3] (A)	[F]	Nucleotide transport and metabolism	Adenylate kinase 4 GN=ADK-B OS=Oryza sativa subsp. japonica (Rice) PE=2 SV=1	Adenylate kinase B [Gossypium arboreum]	Purine metabolism (ko00230)
Gorai.001G060700	11.2289	9.02718	6.15185	3.1841	4.03853	7.58398	10.8034	5.562	2.12527	3.60681	0.00870888	-1.56434	down	0.63926	-0.676447	normal	1.53581e-06	-2.30542	down	0.670544	-0.623496	normal	[IQ]	--	Molecular Function: fatty-acyl-CoA synthase activity (GO:0004321);; Cellular Component: peroxisome (GO:0005777);; Cellular Component: plastid (GO:0009536);; Biological Process: jasmonic acid biosynthetic process (GO:0009695);; Biological Process: auxin biosynthetic process (GO:0009851);; Molecular Function: ligase activity (GO:0016874);; Molecular Function: Photinus-luciferin 4-monooxygenase (ATP…	--	[I]	Lipid transport and metabolism	4-coumarate--CoA ligase-like 9 GN=4CLL9 OS=Arabidopsis thaliana (Mouse-ear cress) PE=1 SV=2	4-coumarate--CoA ligase-like 9 [Gossypium arboreum]	--
Gorai.001G061100	9.83945	36.3312	35.2302	25.2284	14.1716	21.4119	23.393	50.5251	39.2037	28.7421	0.910431	-0.518946	normal	0.00441267	-1.36242	down	0.706787	0.793948	normal	0.309149	-0.803482	normal	--	--	Molecular Function: RNA binding (GO:0003723);; Cellular Component: cytosol (GO:0005829);; Cellular Component: plastid chromosome (GO:0009508);; Cellular Component: chloroplast stroma (GO:0009570);; Biological Process: transcription from plastid promoter (GO:0042793);; Biological Process: positive regulation of transcription, DNA-templated (GO:0045893);;	--	--	--	--	Nucleic acid-binding, OB-fold-like protein isoform 1 [Theobroma cacao]	--
Gorai.001G061300	6.35795	9.34902	10.6478	3.54371	4.92997	13.9537	10.4924	12.8503	10.2077	10.6869	0.0072211	-1.57521	down	0.415119	-0.821373	normal	0.854512	-0.419514	normal	0.778011	-0.515422	normal	[J]	Translation, ribosomal structure and biogenesis	Cellular Component: intracellular organelle (GO:0043229);; Cellular Component: cytoplasmic part (GO:0044444);;	--	--	--	30S ribosomal protein S21, chloroplastic (Fragment) GN=rps21 OS=Spinacia oleracea (Spinach) PE=1 SV=1	Telomere length regulation TEL2 [Gossypium arboreum]	--
Gorai.001G063100	38.399	149.216	132.434	71.9626	43.2062	65.7941	117.152	108.379	110.407	90.3098	0.548859	-0.980149	normal	0.000723561	-1.51016	down	0.973516	0.0149327	normal	0.972732	-0.259213	normal	[R]	General function prediction only	Biological Process: maltose metabolic process (GO:0000023);; Molecular Function: nucleotide binding (GO:0000166);; Biological Process: alternative mRNA splicing, via spliceosome (GO:0000380);; Molecular Function: nucleic acid binding (GO:0003676);; Molecular Function: double-stranded DNA binding (GO:0003690);; Molecular Function: single-stranded DNA binding (GO:0003697);; Molecular Function: mRNA…	K11294|9.91749e-156|tcc:TCM_014513|31-kDa RNA binding protein; K11294 nucleolin (A)	[R]	General function prediction only	31 kDa ribonucleoprotein, chloroplastic (Precursor) GN=F22K18.30 OS=Arabidopsis thaliana (Mouse-ear cress) PE=1 SV=1	31 kDa ribonucleoprotein, chloroplastic -like protein [Gossypium arboreum]	--
Gorai.001G063200	5.53643	11.5139	8.54813	4.54337	1.5833	0.671681	2.5236	0.764839	6.49831	3.60243	0.0997722	-1.27913	normal	2.91966e-05	-2.2761	down	0.0483169	1.46482	normal	0.00903001	2.00409	up	--	--	--	--	--	--	--	Uncharacterized protein TCM_014508 [Theobroma cacao]	--
Gorai.001G063600	0.847288	32.8002	24.2768	105.967	43.6207	25.4603	19.5462	122.016	82.0182	108.902	0.00354575	1.66192	up	0.520787	0.81446	normal	2.60849e-06	2.09898	up	0.987891	-0.185358	normal	[Q]	Secondary metabolites biosynthesis, transport and catabolism	Molecular Function: binding (GO:0005488);; Cellular Component: Golgi apparatus (GO:0005794);; Cellular Component: plasma membrane (GO:0005886);; Biological Process: response to bacterium (GO:0009617);; Biological Process: response to organic substance (GO:0010033);; Molecular Function: oxidoreductase activity (GO:0016491);; Biological Process: single-organism process (GO:0044699);; Biological Pro…	--	[Q]	Secondary metabolites biosynthesis, transport and catabolism	Cytochrome P450 71A9 GN=CYP71A9 OS=Glycine max (Soybean) PE=2 SV=1	Cytochrome P450 71A9, putative [Theobroma cacao]	--
Gorai.001G063900	0.201944	1.25903	1.4547	5.46609	3.52162	0	0.413601	0.719396	2.00823	1.00027	0.000381765	2.07834	up	0.0970642	1.27536	normal	0.00417996	2.18589	up	0.951437	0.46899	normal	[Q]	Secondary metabolites biosynthesis, transport and catabolism	Biological Process: response to molecule of fungal origin (GO:0002238);; Molecular Function: binding (GO:0005488);; Biological Process: terpenoid metabolic process (GO:0006721);; Biological Process: response to bacterium (GO:0009617);; Cellular Component: membrane (GO:0016020);; Molecular Function: oxidoreductase activity (GO:0016491);; Cellular Component: intracellular membrane-bounded organelle…	--	[Q]	Secondary metabolites biosynthesis, transport and catabolism	Cytochrome P450 71A1 GN=CYP71A1 OS=Persea americana (Avocado) PE=1 SV=2	Cytochrome P450 71A1 [Theobroma cacao]	--
Gorai.001G064000	42.0235	9.66982	8.47596	26.8869	50.0127	27.4472	17.1007	13.2936	17.6838	17.901	0.0182384	1.44708	normal	5.23134e-11	2.51065	up	0.942254	-0.134296	normal	0.906187	0.386353	normal	[R]	General function prediction only	Molecular Function: enzyme activator activity (GO:0008047);; Molecular Function: quinolinate synthetase A activity (GO:0008987);; Biological Process: aerobic respiration (GO:0009060);; Biological Process: NAD biosynthetic process (GO:0009435);; Cellular Component: chloroplast (GO:0009507);; Biological Process: iron-sulfur cluster assembly (GO:0016226);; Molecular Function: protein homodimerizatio…	K03517|0|tcc:TCM_014491|Quinolinate synthase; K03517 quinolinate synthase [EC:2.5.1.72] (A)	--	--	Quinolinate synthase, chloroplastic (Precursor) GN=K6A12.7 OS=Arabidopsis thaliana (Mouse-ear cress) PE=1 SV=1	SufE-like protein, chloroplastic [Gossypium arboreum]	Nicotinate and nicotinamide metabolism (ko00760)
Gorai.001G067000	17.0931	35.835	32.628	15.8076	14.9715	29.5495	26.0234	35.654	31.9599	43.5955	0.0515247	-1.3154	normal	0.00873967	-1.29836	down	0.934297	0.163198	normal	0.957602	0.214846	normal	--	--	Molecular Function: sequence-specific DNA binding transcription factor activity (GO:0003700);; Cellular Component: nucleus (GO:0005634);; Biological Process: determination of bilateral symmetry (GO:0009855);; Biological Process: polarity specification of adaxial/abaxial axis (GO:0009944);; Biological Process: meristem initiation (GO:0010014);; Biological Process: guard cell differentiation (GO:00…	--	--	--	Dof zinc finger protein DOF5.4 GN=MAE1.9 OS=Arabidopsis thaliana (Mouse-ear cress) PE=2 SV=2	OBF binding protein 4, putative [Theobroma cacao]	--
Gorai.001G067100	0.802018	3.86472	2.20643	1.16938	0.456785	0.945665	3.67249	2.06963	2.59155	2.32372	0.141931	-1.28877	normal	0.000702427	-2.14668	down	0.877502	-0.234264	normal	0.877174	0.497621	normal	--	--	Cellular Component: nucleus (GO:0005634);; Biological Process: regulation of asymmetric cell division (GO:0009786);; Biological Process: unidimensional cell growth (GO:0009826);; Biological Process: stomatal complex development (GO:0010374);; Cellular Component: extrinsic component of plasma membrane (GO:0019897);;	--	--	--	Protein BREAKING OF ASYMMETRY IN THE STOMATAL LINEAGE GN=BASL OS=Arabidopsis thaliana (Mouse-ear cress) PE=2 SV=1	Uncharacterized protein isoform 1 [Theobroma cacao]	--
Gorai.001G067500	3.13518	13.7848	7.38884	0.327154	0.608281	48.4771	11.2098	8.06	1.19942	2.67782	3.87468e-14	-4.87691	down	2.64118e-08	-3.34836	down	8.37042e-08	-2.99638	down	0.0025429	-1.58094	down	--	--	Cellular Component: cytoplasm (GO:0005737);; Biological Process: tryptophan catabolic process (GO:0006569);; Molecular Function: sulfotransferase activity (GO:0008146);; Biological Process: response to water deprivation (GO:0009414);; Biological Process: indoleacetic acid biosynthetic process (GO:0009684);; Biological Process: jasmonic acid biosynthetic process (GO:0009695);; Biological Process: …	--	[R]	General function prediction only	Cytosolic sulfotransferase 16 GN=F2P9.3 OS=Arabidopsis thaliana (Mouse-ear cress) PE=1 SV=1	hypothetical protein CICLE_v10023927mg [Citrus clementina]	--
Gorai.001G067800	14.5398	20.4064	25.0236	9.24712	9.28216	17.686	14.0846	15.5579	10.8433	13.6978	0.188936	-1.1169	normal	0.00272385	-1.40042	down	0.899064	-0.289974	normal	0.944563	-0.193962	normal	[M]	Cell wall/membrane/envelope biogenesis	Biological Process: ethylene biosynthetic process (GO:0009693);; Biological Process: UDP-N-acetylgalactosamine biosynthetic process (GO:0019277);; Molecular Function: carbohydrate binding (GO:0030246);; Biological Process: lipid glycosylation (GO:0030259);; Molecular Function: undecaprenyldiphospho-muramoylpentapeptide beta-N-acetylglucosaminyltransferase activity (GO:0050511);; Molecular Functio…	K02563|2.91243e-35|tcc:TCM_012487|UDP-N-acetylglucosamine--N-acetylmuramyl-(pentapeptide) pyrophosphoryl-undecaprenol N-acetylglucosamine transferase, putative; K02563 UDP-N-acetylglucosamine--N-acetylmuramyl-(pentapeptide) pyrophosphoryl-undecaprenol N-acetylglucosamine transferase [EC:2.4.1.227] (A)	--	--	--	UDP-N-acetylglucosamine--N-acetylmuramyl- (pentapeptide) pyrophosphoryl-undecaprenol N-acetylglucosamine transferase [Gossypium arboreum]	Vancomycin resistance (ko01502)
Gorai.001G068700	1.43505	0.642622	1.5882	2.61811	1.77607	1.55817	1.27227	1.66223	1.07456	0.722497	0.00316137	2.22006	up	0.844911	0.708029	normal	0.915486	-0.384696	normal	0.645445	-1.09533	normal	--	--	Molecular Function: phosphorelay response regulator activity (GO:0000156);; Molecular Function: chromatin binding (GO:0003682);; Molecular Function: sequence-specific DNA binding transcription factor activity (GO:0003700);; Cellular Component: cell wall (GO:0005618);; Cellular Component: nucleus (GO:0005634);; Biological Process: rRNA processing (GO:0006364);; Biological Process: regulation of tr…	--	--	--	Transcription repressor KAN1 GN=MQK4.31 OS=Arabidopsis thaliana (Mouse-ear cress) PE=1 SV=1	Homeodomain-like superfamily protein, putative isoform 2 [Theobroma cacao]	--
Gorai.001G069700	43.0544	2.13759	7.49483	23.077	38.5027	21.5783	7.10181	0.940384	4.05206	7.94201	2.27118e-12	3.38165	up	2.78811e-09	2.319	up	0.651384	-0.692504	normal	1.38778e-14	3.05453	up	[KAD]	--	Molecular Function: sequence-specific DNA binding transcription factor activity (GO:0003700);; Cellular Component: nucleus (GO:0005634);; Biological Process: response to cold (GO:0009409);; Biological Process: response to red or far red light (GO:0009639);; Biological Process: response to salt stress (GO:0009651);; Biological Process: response to ethylene (GO:0009723);; Biological Process: respon…	--	[O]	Posttranslational modification, protein turnover, chaperones	Protein REVEILLE 7 GN=F15H18.16 OS=Arabidopsis thaliana (Mouse-ear cress) PE=2 SV=1	Protein LHY -like protein [Gossypium arboreum]	--
Gorai.001G071900	20.6888	2.51599	10.1548	15.8077	21.6487	8.56054	0.577017	3.73805	0.615871	2.93772	1.26496e-07	2.61513	up	0.052862	1.12509	normal	0.953343	0.129832	normal	0.902185	-0.338753	normal	--	--	Biological Process: single-organism process (GO:0044699);;	--	--	--	Protein PHYTOCHROME KINASE SUBSTRATE 1 GN=PKS1 OS=Arabidopsis thaliana (Mouse-ear cress) PE=1 SV=2	Phytochrome kinase substrate 1, putative [Theobroma cacao]	--
Gorai.001G075900	57.251	42.4575	14.5928	34.8562	47.3126	44.5209	81.7834	16.8854	19.1667	21.8378	0.955441	-0.28336	normal	5.1573e-05	1.69628	up	1.04622e-05	-2.01986	down	0.927713	0.359747	normal	[V]	Defense mechanisms	Biological Process: response to reactive oxygen species (GO:0000302);; Cellular Component: plant-type vacuole (GO:0000325);; Biological Process: cell morphogenesis (GO:0000902);; Molecular Function: protein binding (GO:0005515);; Molecular Function: ATP binding (GO:0005524);; Cellular Component: vacuolar membrane (GO:0005774);; Cellular Component: plasma membrane (GO:0005886);; Biological Process…	--	[U]	Intracellular trafficking, secretion, and vesicular transport	ABC transporter B family member 25 GN=OSJNBb0081K01.19 OS=Oryza sativa subsp. japonica (Rice) PE=2 SV=1	ABC transporter B family member 25 [Gossypium arboreum]	--
Gorai.001G077300	26.7478	9.93688	19.6504	30.6959	24.4801	22.9597	9.85533	8.4228	18.8922	21.9488	0.00238763	1.66182	up	0.907258	0.352133	normal	0.273159	0.979405	normal	0.000238121	1.34202	up	[E]	Amino acid transport and metabolism	Molecular Function: magnesium ion binding (GO:0000287);; Molecular Function: phosphoserine phosphatase activity (GO:0004647);; Biological Process: L-serine biosynthetic process (GO:0006564);; Cellular Component: chloroplast (GO:0009507);; Biological Process: pollen development (GO:0009555);; Biological Process: embryo development (GO:0009790);; Biological Process: dephosphorylation (GO:0016311);;…	K01079|0|tcc:TCM_014263|3-phosphoserine phosphatase isoform 1; K01079 phosphoserine phosphatase [EC:3.1.3.3] (A)	[E]	Amino acid transport and metabolism	Phosphoserine phosphatase, chloroplastic (Precursor) GN=F26I16.2 OS=Arabidopsis thaliana (Mouse-ear cress) PE=1 SV=2	3-phosphoserine phosphatase isoform 1 [Theobroma cacao]	Glycine, serine and threonine metabolism (ko00260);; Carbon metabolism (ko01200);; Biosynthesis of amino acids (ko01230)
Gorai.001G077800	23.3166	9.52587	7.29699	19.9261	40.4884	10.2768	8.73491	8.64197	11.828	8.26166	0.265421	1.08508	normal	2.11165e-10	2.42884	up	0.872365	0.468209	normal	0.95709	-0.0745528	normal	[IR]	--	Molecular Function: diacylglycerol kinase activity (GO:0004143);; Biological Process: protein kinase C-activating G-protein coupled receptor signaling pathway (GO:0007205);; Biological Process: response to cold (GO:0009409);; Biological Process: response to wounding (GO:0009611);; Biological Process: phosphorylation (GO:0016310);; Biological Process: intracellular signal transduction (GO:0035556)…	K00901|0|tcc:TCM_014170|Diacylglycerol kinase 1 isoform 3; K00901 diacylglycerol kinase (ATP) [EC:2.7.1.107] (A)	[IT]	--	Diacylglycerol kinase 1 GN=DGK1 OS=Arabidopsis thaliana (Mouse-ear cress) PE=1 SV=2	Diacylglycerol kinase 1 -like protein [Gossypium arboreum]	Glycerolipid metabolism (ko00561);; Glycerophospholipid metabolism (ko00564);; Phosphatidylinositol signaling system (ko04070)
Gorai.001G077900	1.52293	1.00916	0.566544	2.66077	5.73683	2.63542	2.48445	1.05347	2.4616	2.37595	0.169225	1.30465	normal	1.05747e-10	3.19588	up	0.894066	0.0236605	normal	0.245454	1.10686	normal	[M]	Cell wall/membrane/envelope biogenesis	Molecular Function: UDP-glucose 6-dehydrogenase activity (GO:0003979);; Cellular Component: cell wall (GO:0005618);; Cellular Component: nucleus (GO:0005634);; Cellular Component: cytosol (GO:0005829);; Biological Process: glucose catabolic process (GO:0006007);; Biological Process: UDP-glucuronate biosynthetic process (GO:0006065);; Biological Process: Golgi organization (GO:0007030);; Biologica…	K00012|0|tcc:TCM_014167|UDP-glucose 6-dehydrogenase family protein isoform 1; K00012 UDPglucose 6-dehydrogenase [EC:1.1.1.22] (A)	[GT]	--	UDP-glucose 6-dehydrogenase 5 GN=OsJ_35986 OS=Oryza sativa subsp. japonica (Rice) PE=2 SV=1	UDP-glucose 6-dehydrogenase family protein isoform 1 [Theobroma cacao]	Pentose and glucuronate interconversions (ko00040);; Ascorbate and aldarate metabolism (ko00053);; Starch and sucrose metabolism (ko00500);; Amino sugar and nucleotide sugar metabolism (ko00520)
Gorai.001G078500	19.3841	5.06929	30.6336	26.56	33.0038	51.7849	1.52455	25.8571	16.3946	34.2877	1.79755e-06	2.32118	up	0.955768	0.127538	normal	2.77223e-13	3.40254	up	0.919265	0.383631	normal	--	--	Molecular Function: DNA binding (GO:0003677);; Molecular Function: sequence-specific DNA binding transcription factor activity (GO:0003700);; Molecular Function: binding (GO:0005488);; Molecular Function: protein binding (GO:0005515);; Cellular Component: nucleus (GO:0005634);; Biological Process: regulation of transcription, DNA-templated (GO:0006355);; Biological Process: cellular amino acid me…	--	--	--	Transcription factor UNE10 GN=F6N15.11 OS=Arabidopsis thaliana (Mouse-ear cress) PE=2 SV=1	DNA binding protein, putative isoform 1 [Theobroma cacao]	--
Gorai.001G080100	1.14167	5.99792	6.15648	3.33273	1.58616	10.9659	5.22781	3.91622	7.20129	7.89648	0.559193	-0.822078	normal	0.000550621	-1.80354	down	0.710194	0.62833	normal	0.117686	0.95921	normal	--	--	--	--	--	--	--	hypothetical protein F383_30440 [Gossypium arboreum]	--
Gorai.001G080700	8.2505	5.02028	9.38306	3.10302	2.8465	11.2797	2.9425	2.84564	6.37488	5.50523	0.689149	-0.691482	normal	0.000454554	-1.68376	down	0.171662	1.11799	normal	0.276703	0.907926	normal	[E]	Amino acid transport and metabolism	Molecular Function: aromatic-L-amino-acid decarboxylase activity (GO:0004058);; Molecular Function: tyrosine decarboxylase activity (GO:0004837);; Cellular Component: cytoplasm (GO:0005737);; Biological Process: cellular amino acid metabolic process (GO:0006520);; Biological Process: L-phenylalanine catabolic process (GO:0006559);; Biological Process: response to water deprivation (GO:0009414);; …	K01592|0|tcc:TCM_026049|Tyrosine/DOPA decarboxylase; K01592 tyrosine decarboxylase [EC:4.1.1.25] (A)	[E]	Amino acid transport and metabolism	Tyrosine decarboxylase GN=TYDC1 OS=Papaver somniferum (Opium poppy) PE=2 SV=1	Tyrosine/DOPA decarboxylase [Theobroma cacao]	Tyrosine metabolism (ko00350);; Isoquinoline alkaloid biosynthesis (ko00950)
Gorai.001G081200	8.70114	18.2039	15.7742	5.34726	2.87785	14.9309	17.6259	17.3392	16.0964	14.694	0.000969358	-1.79369	down	5.8079e-08	-2.35392	down	0.920722	-0.0794378	normal	0.921875	-0.273343	normal	--	--	Molecular Function: C-5 sterol desaturase activity (GO:0000248);; Molecular Function: iron ion binding (GO:0005506);; Cellular Component: endoplasmic reticulum membrane (GO:0005789);; Biological Process: fatty acid biosynthetic process (GO:0006633);; Cellular Component: integral component of membrane (GO:0016021);; Biological Process: sterol biosynthetic process (GO:0016126);; Biological Process:…	K00227|1.39489e-173|tcc:TCM_019400|Delta(7)-sterol-C5(6)-desaturase; K00227 lathosterol oxidase [EC:1.14.21.6] (A)	[I]	Lipid transport and metabolism	Delta(7)-sterol-C5(6)-desaturase 1 GN=F16B3.21 OS=Arabidopsis thaliana (Mouse-ear cress) PE=1 SV=2	Delta(7)-sterol-C5(6)-desaturase 1 -like protein [Gossypium arboreum]	Steroid biosynthesis (ko00100)
Gorai.001G081600	33.3973	49.5141	25.5892	14.2114	11.6646	26.9277	38.0039	11.5385	14.8795	11.3012	0.000494755	-1.83128	down	0.008873	-1.29855	down	0.0110565	-1.42721	normal	0.959213	-0.0534323	normal	[P]	Inorganic ion transport and metabolism	Biological Process: response to hypoxia (GO:0001666);; Cellular Component: extracellular region (GO:0005576);; Cellular Component: nucleus (GO:0005634);; Cellular Component: plasma membrane (GO:0005886);; Biological Process: protein targeting to membrane (GO:0006612);; Biological Process: nucleotide transport (GO:0006862);; Biological Process: ER to Golgi vesicle-mediated transport (GO:0006888);;…	K03320|0|tcc:TCM_041632|Ammonium transporter 1 member 2; K03320 ammonium transporter, Amt family (A)	[P]	Inorganic ion transport and metabolism	Ammonium transporter 1 member 3 GN=AMT1-3 OS=Solanum lycopersicum (Tomato) PE=2 SV=1	Ammonium transporter 1 member 2 [Theobroma cacao]	--
Gorai.001G082200	12.7007	3.05387	3.79237	6.7122	10.2523	8.0731	7.62624	6.34367	4.77283	5.32521	0.156116	1.14957	normal	0.00735726	1.33937	up	0.713636	-0.636927	normal	0.919826	-0.253001	normal	[M]	Cell wall/membrane/envelope biogenesis	Biological Process: anatomical structure morphogenesis (GO:0009653);; Biological Process: cell wall macromolecule catabolic process (GO:0016998);; Biological Process: single-organism developmental process (GO:0044767);; Biological Process: cellular developmental process (GO:0048869);; Molecular Function: glucan endo-1,3-beta-glucanase activity, C-3 substituted reducing group (GO:0052861);; Molecu…	--	[G]	Carbohydrate transport and metabolism	Leucine-rich repeat extensin-like protein 1 (Precursor) GN=LRX1 OS=Arabidopsis thaliana (Mouse-ear cress) PE=1 SV=1	Glycosyl hydrolase family 81 protein [Theobroma cacao]	--
Gorai.001G082500	85.1442	83.8292	54.7481	20.4494	69.0947	91.9887	42.1496	135.02	48.5703	98.9711	7.96897e-05	-1.99221	down	0.960588	0.303753	normal	0.95626	0.226696	normal	0.956602	-0.445807	normal	[I]	Lipid transport and metabolism	Cellular Component: Golgi membrane (GO:0000139);; Molecular Function: carboxylic ester hydrolase activity (GO:0004091);; Cellular Component: extracellular region (GO:0005576);; Cellular Component: endoplasmic reticulum membrane (GO:0005789);; Biological Process: fatty acid catabolic process (GO:0009062);; Cellular Component: chloroplast (GO:0009507);; Biological Process: response to abscisic acid…	K15889|0|tcc:TCM_019599|Prenylcysteine methylesterase; K15889 prenylcysteine alpha-carboxyl methylesterase [EC:3.1.1.-] (A)	[R]	General function prediction only	Isoprenylcysteine alpha-carbonyl methylesterase ICME GN=F14F8.240 OS=Arabidopsis thaliana (Mouse-ear cress) PE=2 SV=1	Isoprenylcysteine alpha-carbonyl methylesterase ICME -like protein [Gossypium arboreum]	Terpenoid backbone biosynthesis (ko00900)
Gorai.001G083700	146.825	53.3904	201.446	77.0828	67.3323	104.028	13.2118	127.249	95.1167	83.8886	0.917456	0.546882	normal	0.000128095	-1.66063	down	1.14396e-11	2.87547	up	0.855015	-0.597319	normal	[I]	Lipid transport and metabolism	Biological Process: unsaturated fatty acid biosynthetic process (GO:0006636);; Biological Process: phosphatidylglycerol biosynthetic process (GO:0006655);; Cellular Component: chloroplast (GO:0009507);; Cellular Component: plastoglobule (GO:0010287);; Biological Process: chlorophyll biosynthetic process (GO:0015995);; Biological Process: carotenoid biosynthetic process (GO:0016117);; Biological P…	K02291|0|tcc:TCM_017615|Phytoene synthase 1; K02291 phytoene synthase [EC:2.5.1.32] (A)	[I]	Lipid transport and metabolism	Phytoene synthase, chloroplastic (Precursor) GN=PSY OS=Cucumis melo (Muskmelon) PE=2 SV=1	phytoene synthase [Gossypium raimondii]	Carotenoid biosynthesis (ko00906)
Gorai.001G084200	0.0882429	0	2.24909	0.186826	0.044747	0.104874	0.0330285	0.0513751	0.0755028	0	--	--	--	3.0524e-09	-4.71659	down	--	--	--	--	--	--	[V]	Defense mechanisms	Cellular Component: plasma membrane (GO:0005886);; Biological Process: drug transmembrane transport (GO:0006855);; Biological Process: response to hormone (GO:0009725);; Molecular Function: drug transmembrane transporter activity (GO:0015238);; Molecular Function: antiporter activity (GO:0015297);; Biological Process: cadmium ion transport (GO:0015691);; Cellular Component: membrane (GO:0016020);…	K03327|0|tcc:TCM_019353|MATE efflux family protein, putative; K03327 multidrug resistance protein, MATE family (A)	[R]	General function prediction only	MATE efflux family protein 5 GN=F3L12.12 OS=Arabidopsis thaliana (Mouse-ear cress) PE=3 SV=1	MATE efflux family protein, putative [Theobroma cacao]	--
Gorai.001G085300	7.77711	5.13668	3.54269	1.28848	1.25002	9.46638	10.3518	4.73698	2.63701	2.08304	0.0071304	-1.6962	down	0.0203856	-1.47114	normal	3.31516e-05	-2.01946	down	0.0347613	-1.1682	normal	[R]	General function prediction only	Cellular Component: integral component of membrane (GO:0016021);; Biological Process: transmembrane transport (GO:0055085);;	--	[S]	Function unknown	--	Auxin efflux carrier family protein isoform 1 [Theobroma cacao]	--
Gorai.001G085900	7.23154	14.0363	12.8435	5.67981	3.59578	8.942	13.4807	8.85105	7.51954	6.4447	0.0731383	-1.26632	normal	8.86329e-05	-1.76164	down	0.59472	-0.749443	normal	0.837646	-0.443742	normal	[J]	Translation, ribosomal structure and biogenesis	Molecular Function: methionyl-tRNA formyltransferase activity (GO:0004479);; Biological Process: translational initiation (GO:0006413);; Molecular Function: formyltetrahydrofolate deformylase activity (GO:0008864);; Biological Process: purine ribonucleotide biosynthetic process (GO:0009152);; Biological Process: conversion of methionyl-tRNA to N-formyl-methionyl-tRNA (GO:0071951);;	K00604|0|tcc:TCM_019284|Formyltransferase, putative isoform 1; K00604 methionyl-tRNA formyltransferase [EC:2.1.2.9] (A)	[J]	Translation, ribosomal structure and biogenesis	Formyltetrahydrofolate deformylase 2, mitochondrial (Precursor) GN=PURU2 OS=Arabidopsis thaliana (Mouse-ear cress) PE=1 SV=1	Methionyl-tRNA formyltransferase [Gossypium arboreum]	One carbon pool by folate (ko00670);; Aminoacyl-tRNA biosynthesis (ko00970)
Gorai.001G086500	0.675874	0.445738	0.952352	2.27002	1.49442	0.287729	0.403277	0.253269	0.697855	0.308161	0.0021055	2.13316	up	0.828774	0.620097	normal	0.884202	0.740767	normal	--	--	--	[RTKL]	--	Molecular Function: protein serine/threonine kinase activity (GO:0004674);; Molecular Function: non-membrane spanning protein tyrosine kinase activity (GO:0004715);; Molecular Function: ATP binding (GO:0005524);; Cellular Component: plasma membrane (GO:0005886);; Biological Process: cellular protein modification process (GO:0006464);; Biological Process: protein phosphorylation (GO:0006468);; Bio…	--	--	--	Probable L-type lectin-domain containing receptor kinase S.5 (Precursor) GN=LECRKS5 OS=Arabidopsis thaliana (Mouse-ear cress) PE=2 SV=1	putative L-type lectin-domain containing receptor kinase S.5 -like protein [Gossypium arboreum]	--
Gorai.001G086600	8.75028	8.94265	3.72184	6.29615	12.3325	5.11669	11.525	4.21215	8.25767	5.89753	0.781817	-0.542677	normal	0.00111775	1.56981	up	0.789347	-0.529038	normal	0.843537	0.464927	normal	--	--	Molecular Function: mannose-6-phosphate isomerase activity (GO:0004476);; Molecular Function: protein binding (GO:0005515);; Cellular Component: cytosol (GO:0005829);; Biological Process: response to blue light (GO:0009637);; Biological Process: response to absence of light (GO:0009646);; Biological Process: response to sucrose (GO:0009744);; Biological Process: chloroplast avoidance movement (GO…	--	--	--	Uncharacterized protein At1g66480 GN=At1g66480 OS=Arabidopsis thaliana (Mouse-ear cress) PE=2 SV=1	hypothetical protein F383_25869 [Gossypium arboreum]	--
Gorai.001G086700	18.007	8.14082	14.3962	24.4272	27.0469	10.5184	7.87981	10.071	10.1698	18.1316	0.00746661	1.54542	up	0.255191	0.920742	normal	0.823349	0.454085	normal	0.219313	0.817315	normal	--	--	Molecular Function: protein binding (GO:0005515);; Biological Process: cellular protein modification process (GO:0006464);; Biological Process: signal transduction (GO:0007165);; Biological Process: plant-type hypersensitive response (GO:0009626);; Biological Process: response to abiotic stimulus (GO:0009628);; Biological Process: defense response, incompatible interaction (GO:0009814);; Biologic…	K08332|0|tcc:TCM_019211|ARM repeat superfamily protein; K08332 vacuolar protein 8 (A)	[S]	Function unknown	U-box domain-containing protein 4 GN=PUB4 OS=Arabidopsis thaliana (Mouse-ear cress) PE=1 SV=3	ARM repeat superfamily protein [Theobroma cacao]	Regulation of autophagy (ko04140)
Gorai.001G087100	65.6578	10.9825	7.7015	31.7114	32.8728	99.0183	33.9425	7.97778	14.0381	17.1501	0.0199938	1.47275	normal	2.25311e-06	2.14366	up	0.045113	-1.2796	normal	0.320756	0.900189	normal	[TZDR]	--	Molecular Function: signal transducer activity (GO:0004871);; Molecular Function: calcium ion binding (GO:0005509);; Cellular Component: nucleus (GO:0005634);; Cellular Component: mitochondrion (GO:0005739);; Cellular Component: vacuolar membrane (GO:0005774);; Cellular Component: cytosol (GO:0005829);; Cellular Component: plasma membrane (GO:0005886);; Biological Process: response to cold (GO:00…	K13448|3.90437e-91|tcc:TCM_019204|Calmodulin like 23, putative; K13448 calcium-binding protein CML (A)	[T]	Signal transduction mechanisms	Probable calcium-binding protein CML23 GN=CML23 OS=Arabidopsis thaliana (Mouse-ear cress) PE=2 SV=1	Calmodulin like 23, putative [Theobroma cacao]	Plant-pathogen interaction (ko04626)
Gorai.001G088400	2.71026	13.3564	13.9925	5.40245	1.43306	3.49612	6.15361	6.35206	7.53576	6.98079	0.197289	-1.21368	normal	2.01176e-07	-2.98442	down	0.844289	0.463952	normal	0.943376	0.147691	normal	--	--	Cellular Component: chloroplast (GO:0009507);; Biological Process: photosynthetic electron transport chain (GO:0009767);; Cellular Component: membrane (GO:0016020);; Cellular Component: membrane part (GO:0044425);; Cellular Component: thylakoid part (GO:0044436);; Molecular Function: electron transporter, transferring electrons within the cyclic electron transport pathway of photosynthesis activi…	--	--	--	PsbQ-like protein 3, chloroplastic (Precursor) GN=PQL3 OS=Arabidopsis thaliana (Mouse-ear cress) PE=2 SV=1	Calcium ion binding protein, putative isoform 1 [Theobroma cacao]	--
Gorai.001G088900	74.1072	25.1439	16.8245	60.6647	78.0735	65.193	56.7514	39.5896	37.7732	48.492	0.157605	1.19236	normal	5.60173e-06	1.84229	up	0.849562	-0.609452	normal	0.972862	0.136031	normal	[Q]	Secondary metabolites biosynthesis, transport and catabolism	Molecular Function: iron ion binding (GO:0005506);; Molecular Function: electron carrier activity (GO:0009055);; Biological Process: response to UV (GO:0009411);; Biological Process: response to auxin (GO:0009733);; Biological Process: flavonoid biosynthetic process (GO:0009813);; Cellular Component: membrane (GO:0016020);; Molecular Function: flavonoid 3'-monooxygenase activity (GO:0016711);; Mo…	--	[Q]	Secondary metabolites biosynthesis, transport and catabolism	Cytochrome P450 81D1 GN=T30G6.3 OS=Arabidopsis thaliana (Mouse-ear cress) PE=2 SV=1	Cytochrome P450 protein [Gossypium arboreum]	--
Gorai.001G090300	3.7639	6.69345	3.03972	0.994579	1.20145	2.13293	10.2128	2.21722	8.31857	10.6454	3.28025e-07	-2.81274	down	0.135269	-1.25494	normal	0.894331	-0.250097	normal	3.88719e-09	2.14683	up	[Q]	Secondary metabolites biosynthesis, transport and catabolism	Biological Process: microtubule bundle formation (GO:0001578);; Molecular Function: monooxygenase activity (GO:0004497);; Molecular Function: iron ion binding (GO:0005506);; Cellular Component: extracellular region (GO:0005576);; Cellular Component: mitochondrion (GO:0005739);; Biological Process: response to stress (GO:0006950);; Molecular Function: electron carrier activity (GO:0009055);; Biolo…	K12640|0|tcc:TCM_018956|Brassinosteroid-6-oxidase 2; K12640 brassinosteroid-6-oxidase 2 [EC:1.14.-.-] (A)	[QI]	--	Cytochrome P450 85A GN=BA13 OS=Phaseolus vulgaris (Kidney bean) PE=3 SV=2	Cytochrome P450 [Gossypium arboreum]	Brassinosteroid biosynthesis (ko00905)
Gorai.001G091300	1.65556	42.6002	22.023	10.233	3.69937	6.80697	33.4791	24.5493	37.0005	24.181	4.73722e-05	-2.06183	down	1.34985e-08	-2.51745	down	0.922132	0.198233	normal	0.948568	-0.0253348	normal	--	--	--	--	--	--	--	hypothetical protein CICLE_v10006215mg [Citrus clementina]	--
Gorai.001G091600	7.9365	14.2914	11.3817	3.4637	6.27069	3.11511	6.74928	5.19056	6.14694	4.22111	0.000166583	-2.07849	down	0.188599	-1.01432	normal	0.880176	-0.211035	normal	0.920501	-0.293332	normal	--	--	--	--	--	--	--	Malectin/receptor protein kinase family protein [Theobroma cacao]	--
Gorai.001G091900	1.38984	0.330909	0.104379	3.87548	1.01031	0.338038	0.471451	6.18815	0.183828	0.173467	1.13708e-05	3.12585	up	0.221603	2.49463	normal	--	--	--	6.66134e-16	-4.74757	down	--	--	Biological Process: response to hypoxia (GO:0001666);; Molecular Function: sequence-specific DNA binding transcription factor activity (GO:0003700);; Cellular Component: nucleus (GO:0005634);; Biological Process: trehalose biosynthetic process (GO:0005992);; Biological Process: proline biosynthetic process (GO:0006561);; Biological Process: nitrogen compound metabolic process (GO:0006807);; Biolo…	--	--	--	Transcription factor JUNGBRUNNEN 1 GN=F23E6.1 OS=Arabidopsis thaliana (Mouse-ear cress) PE=1 SV=1	NAC domain-containing protein 42 [Theobroma cacao]	--
Gorai.001G092100	5.61927	2.22743	1.18826	3.14033	4.00073	4.2107	4.82195	5.31265	2.30593	3.31024	0.827518	0.45386	normal	0.00326202	1.73695	up	0.361243	-0.9769	normal	0.614759	-0.684693	normal	--	--	Molecular Function: structural constituent of ribosome (GO:0003735);; Molecular Function: aspartic-type endopeptidase activity (GO:0004190);; Cellular Component: extracellular region (GO:0005576);; Cellular Component: ribosome (GO:0005840);; Biological Process: translation (GO:0006412);; Biological Process: proteolysis (GO:0006508);; Biological Process: defense response (GO:0006952);; Biological …	--	[O]	Posttranslational modification, protein turnover, chaperones	Protein ASPARTIC PROTEASE IN GUARD CELL 1 (Precursor) GN=ASPG1 OS=Arabidopsis thaliana (Mouse-ear cress) PE=1 SV=1	Eukaryotic aspartyl protease family protein isoform 1 [Theobroma cacao]	--
Gorai.001G092300	65.0649	1.80187	19.0476	47.0158	55.9513	50.9367	4.23821	4.46782	4.99486	14.7176	0	4.57581	up	0.000186437	1.60948	up	0.864878	0.317348	normal	1.84665e-05	1.65425	up	--	--	Cellular Component: chloroplast thylakoid membrane (GO:0009535);;	--	--	--	--	TRNA-methyltransferase [Theobroma cacao]	--
Gorai.001G092800	52.0498	22.1007	28.7459	94.4939	124.285	119.96	42.5297	192.374	123.938	151.832	3.36101e-05	2.06754	up	5.37443e-08	2.1576	up	0.00102617	1.6274	up	0.947243	-0.360369	normal	--	--	--	--	--	--	Cysteine-rich and transmembrane domain-containing protein A GN=At2g41420 OS=Arabidopsis thaliana (Mouse-ear cress) PE=3 SV=1	hypothetical protein F383_05778 [Gossypium arboreum]	--
Gorai.001G093400	19.7418	5.95648	8.89842	16.1723	28.0174	13.2421	16.2784	10.2865	7.33229	14.4257	0.0360234	1.37395	normal	0.000201522	1.63607	up	0.202386	-1.04122	normal	0.825075	0.460089	normal	--	--	--	--	--	--	--	Uncharacterized protein TCM_002034 [Theobroma cacao]	--
Gorai.001G094000	8.7221e-18	2.72212	15.1703	27.0238	35.6426	14.5226	1.12995	7.8775	3.2538e-09	56.0529	3.95669e-11	3.14527	up	0.0563721	1.12505	normal	0.000226477	-3.74243	down	0	2.80798	up	--	--	Molecular Function: binding (GO:0005488);; Biological Process: response to stress (GO:0006950);; Cellular Component: plant-type cell wall (GO:0009505);; Biological Process: response to abiotic stimulus (GO:0009628);; Biological Process: post-embryonic development (GO:0009791);; Biological Process: response to organic substance (GO:0010033);; Biological Process: cellular component organization (GO…	--	--	--	36.4 kDa proline-rich protein GN=TPRP-F1 OS=Solanum lycopersicum (Tomato) PE=2 SV=1	Bifunctional inhibitor/lipid-transfer protein/seed storage 2S albumin superfamily protein isoform 1 [Theobroma cacao]	--
Gorai.001G096200	419.521	116.316	196.222	630.198	486.375	699.432	224.005	359.143	363.924	605.303	4.53188e-07	2.39666	up	0.00282452	1.40779	up	0.678833	0.798886	normal	0.663251	0.678886	normal	--	--	Biological Process: defense response (GO:0006952);; Biological Process: ethylene biosynthetic process (GO:0009693);; Molecular Function: 1-aminocyclopropane-1-carboxylate oxidase activity (GO:0009815);; Biological Process: fruit ripening (GO:0009835);; Molecular Function: oxidoreductase activity, acting on paired donors, with incorporation or reduction of molecular oxygen, 2-oxoglutarate as one d…	K05933|1.19803e-26|rcu:RCOM_0100310|1-aminocyclopropane-1-carboxylate oxidase, putative (EC:1.14.17.4); K05933 aminocyclopropanecarboxylate oxidase [EC:1.14.17.4] (A)	[QR]	--	1-aminocyclopropane-1-carboxylate oxidase 1 GN=ACO1 OS=Petunia hybrida (Petunia) PE=1 SV=1	1-aminocyclopropane-1-carboxylate oxidase 1 [Gossypium arboreum]	Cysteine and methionine metabolism (ko00270)
Gorai.001G096300	19.6136	4.03594	5.86642	32.0212	47.463	27.6005	8.79784	22.7889	12.0808	22.2287	7.52155e-10	2.90988	up	1.37668e-14	2.97009	up	0.836951	0.461502	normal	0.965189	-0.0355131	normal	[R]	General function prediction only	Molecular Function: iron ion binding (GO:0005506);; Cellular Component: cytoplasm (GO:0005737);; Biological Process: defense response (GO:0006952);; Biological Process: ethylene biosynthetic process (GO:0009693);; Molecular Function: 1-aminocyclopropane-1-carboxylate oxidase activity (GO:0009815);; Biological Process: fruit ripening (GO:0009835);; Molecular Function: oxidoreductase activity, acti…	K05933|0|tcc:TCM_002179|Ethylene-forming enzyme; K05933 aminocyclopropanecarboxylate oxidase [EC:1.14.17.4] (A)	[QR]	--	1-aminocyclopropane-1-carboxylate oxidase 3 GN=ACO3 OS=Petunia hybrida (Petunia) PE=3 SV=1	1-aminocyclopropane-1-carboxylate oxidase [Gossypium hirsutum]	Cysteine and methionine metabolism (ko00270)
Gorai.001G096500	9.20084	4.34845	2.42852	14.4959	12.021	16.166	13.0704	3.46082	2.44191	6.30691	0.00347294	1.71759	up	1.11176e-06	2.36944	up	4.22855e-05	-2.18102	down	0.532234	0.838003	normal	--	--	Molecular Function: phosphoprotein phosphatase activity (GO:0004721);; Molecular Function: protein tyrosine phosphatase activity (GO:0004725);; Cellular Component: cytoplasm (GO:0005737);; Biological Process: peptidyl-tyrosine dephosphorylation (GO:0035335);; Biological Process: negative regulation of MAP kinase activity (GO:0043407);;	K18045|1.5426e-120|cit:102612228|probable tyrosine-protein phosphatase At1g05000-like; K18045 tyrosine-protein phosphatase SIW14 [EC:3.1.3.48] (A)	[V]	Defense mechanisms	Probable tyrosine-protein phosphatase At1g05000 GN=At1g05000 OS=Arabidopsis thaliana (Mouse-ear cress) PE=1 SV=1	hypothetical protein F383_27769 [Gossypium arboreum]	--
Gorai.001G097300	2.75538	27.5986	16.8674	9.0779	3.16949	10.1442	26.9206	27.0439	21.6137	11.1886	0.0011391	-1.75043	down	4.70933e-07	-2.21195	down	0.858177	-0.479856	normal	0.00196346	-1.20281	down	[R]	General function prediction only	Cellular Component: nucleus (GO:0005634);; Biological Process: rRNA processing (GO:0006364);; Cellular Component: chloroplast (GO:0009507);; Biological Process: chloroplast organization (GO:0009658);; Biological Process: mRNA modification (GO:0016556);; Biological Process: tRNA 3'-end processing (GO:0042780);; Molecular Function: 3'-tRNA processing endoribonuclease activity (GO:0042781);;	K00784|0|tcc:TCM_002265|Metallo-hydrolase/oxidoreductase superfamily protein; K00784 ribonuclease Z [EC:3.1.26.11] (A)	--	--	Ribonuclease Z, chloroplastic (Precursor) GN=CPZ OS=Arabidopsis thaliana (Mouse-ear cress) PE=2 SV=1	Ribonuclease Z, chloroplastic -like protein [Gossypium arboreum]	RNA transport (ko03013)
Gorai.001G097600	2.62403	8.13156	6.61372	1.75378	1.78585	4.7257	7.60214	6.95708	6.30275	7.00617	0.000123699	-2.12966	down	0.00032221	-1.81691	down	0.892012	-0.175203	normal	0.939859	0.00131829	normal	[R]	General function prediction only	Molecular Function: Rab GTPase activator activity (GO:0005097);; Cellular Component: intracellular (GO:0005622);; Biological Process: actin filament-based movement (GO:0030048);; Biological Process: positive regulation of Rab GTPase activity (GO:0032851);; Biological Process: Golgi localization (GO:0051645);; Biological Process: mitochondrion localization (GO:0051646);; Biological Process: peroxi…	--	[U]	Intracellular trafficking, secretion, and vesicular transport	--	TBC1 domain family member 2A [Gossypium arboreum]	--
Gorai.001G097900	13.1044	35.6852	70.5049	28.7073	15.409	46.656	65.1016	20.686	33.3141	27.8375	0.9044	-0.345375	normal	2.35753e-08	-2.18809	down	0.431134	-0.917093	normal	0.886897	0.38395	normal	[M]	Cell wall/membrane/envelope biogenesis	Cellular Component: Golgi apparatus (GO:0005794);; Biological Process: acetyl-CoA metabolic process (GO:0006084);; Cellular Component: plant-type cell wall (GO:0009505);; Cellular Component: plasmodesma (GO:0009506);; Biological Process: plant-type cell wall organization (GO:0009664);; Biological Process: plant-type cell wall biogenesis (GO:0009832);; Biological Process: regulation of meristem gr…	--	--	--	Fasciclin-like arabinogalactan protein 7 (Precursor) GN=FLA7 OS=Arabidopsis thaliana (Mouse-ear cress) PE=1 SV=1	fasciclin-like arabinogalactan protein 2 [Gossypium hirsutum]	--
Gorai.001G101200	191.089	52.319	226.077	103.74	85.7248	174.105	12.5338	134.024	69.8153	90.982	0.402592	0.992703	normal	0.00285268	-1.40672	down	7.78883e-09	2.55308	up	0.752046	-0.595803	normal	--	--	Cellular Component: chloroplast thylakoid membrane (GO:0009535);; Cellular Component: photosystem I reaction center (GO:0009538);; Biological Process: photosynthesis (GO:0015979);; Cellular Component: integral component of membrane (GO:0016021);;	K02699|1.09503e-116|tcc:TCM_002614|Photosystem I reaction center subunit XI; K02699 photosystem I subunit XI (A)	--	--	Photosystem I reaction center subunit XI, chloroplastic (Precursor) GN=PSAL OS=Cucumis sativus (Cucumber) PE=2 SV=1	Photosystem I reaction center subunit XI, chloroplastic -like protein [Gossypium arboreum]	Photosynthesis (ko00195)
Gorai.001G102200	5.28438	4.46211	8.26337	15.4553	13.6924	7.77157	5.34652	10.5139	11.8763	12.6664	0.00500673	1.66328	up	0.651487	0.664912	normal	0.165755	1.11008	normal	0.91816	0.242681	normal	[S]	Function unknown	Cellular Component: cytosol (GO:0005829);;	--	--	--	Uncharacterized protein At5g48480 GN=At5g48480 OS=Arabidopsis thaliana (Mouse-ear cress) PE=1 SV=1	hypothetical protein F383_12866 [Gossypium arboreum]	--
Gorai.001G105600	2.30844	0.767609	0.409031	6.08748	20.9197	3.9869	28.1996	2.60273	2.34416	1.77646	0.0201193	2.49386	normal	1.7808e-13	4.95461	up	1.15523e-08	-3.22048	down	--	--	--	--	--	--	--	--	--	--	Uncharacterized protein TCM_041991 [Theobroma cacao]	--
Gorai.001G107200	2.17434	3.69026	1.26947	2.19817	4.5163	3.815	6.21014	2.92715	5.66077	8.70281	0.642398	-0.736881	normal	0.00023951	1.81481	up	0.908089	-0.100519	normal	2.40468e-05	1.54927	up	[R]	General function prediction only	Molecular Function: protein binding (GO:0005515);; Cellular Component: nucleus (GO:0005634);; Cellular Component: endoplasmic reticulum (GO:0005783);; Cellular Component: plasma membrane (GO:0005886);; Biological Process: response to salt stress (GO:0009651);; Biological Process: monovalent inorganic cation transport (GO:0015672);; Biological Process: cellular component organization (GO:0016043);…	--	[R]	General function prediction only	Ankyrin repeat-containing protein At5g02620 GN=At5g02620 OS=Arabidopsis thaliana (Mouse-ear cress) PE=1 SV=1	Ankyrin-2 [Gossypium arboreum]	--
Gorai.001G107300	8.88733	32.9335	14.1174	10.2151	14.6001	43.0552	30.7644	19.5371	30.6328	65.9139	0.00214682	-1.67732	down	0.942521	-0.0764864	normal	0.959686	0.00923921	normal	1.43046e-08	1.75444	up	--	--	Biological Process: very long-chain fatty acid metabolic process (GO:0000038);; Cellular Component: extracellular region (GO:0005576);; Cellular Component: endoplasmic reticulum (GO:0005783);; Biological Process: polysaccharide metabolic process (GO:0005976);; Biological Process: nucleobase-containing compound metabolic process (GO:0006139);; Biological Process: cellular amino acid metabolic proc…	--	--	--	3-ketoacyl-CoA synthase 12 (Precursor) GN=KCS12 OS=Arabidopsis thaliana (Mouse-ear cress) PE=2 SV=1	3-ketoacyl-CoA synthase 3 [Gossypium raimondii]	--
Gorai.001G108900	0.0642356	0.880335	2.01285	1.20743	0.200376	0	0.350245	0.308149	0.483364	0.0648406	0.933532	0.345634	normal	0.00230663	-2.91297	down	--	--	--	--	--	--	--	--	Molecular Function: sequence-specific DNA binding transcription factor activity (GO:0003700);; Molecular Function: protein binding (GO:0005515);; Cellular Component: nucleus (GO:0005634);; Biological Process: regulation of transcription, DNA-templated (GO:0006355);; Biological Process: signal transduction (GO:0007165);; Biological Process: cell proliferation (GO:0008283);; Biological Process: res…	--	--	--	WUSCHEL-related homeobox 2 GN=WOX2 OS=Arabidopsis thaliana (Mouse-ear cress) PE=2 SV=1	WUSCHEL related homeobox 2, putative [Theobroma cacao]	--
Gorai.001G110300	6.53147	15.2932	14.1819	6.69442	2.62219	6.63893	4.20699	3.0549	10.194	7.03004	0.262835	-1.14988	normal	0.000423807	-2.15992	down	0.155861	1.35093	normal	0.52616	1.14947	normal	--	--	--	--	--	--	Cyclin-dependent protein kinase inhibitor SMR3 GN=SMR3 OS=Arabidopsis thaliana (Mouse-ear cress) PE=2 SV=1	Uncharacterized protein isoform 1 [Theobroma cacao]	--
Gorai.001G110400	0.450676	1.59076	0.296025	0.10952	0.253987	0.145097	0.122572	0	0.536376	0.164568	0.00044064	-3.13757	down	--	--	--	--	--	--	--	--	--	[Z]	Cytoskeleton	Molecular Function: structural constituent of cytoskeleton (GO:0005200);; Molecular Function: protein binding (GO:0005515);; Molecular Function: ATP binding (GO:0005524);; Cellular Component: cell wall (GO:0005618);; Cellular Component: nucleolus (GO:0005730);; Cellular Component: cytoplasm (GO:0005737);; Cellular Component: mitochondrion (GO:0005739);; Cellular Component: cytosol (GO:0005829);; …	K10355|0|tcc:TCM_021944|Actin 3; K10355 actin, other eukaryote (A)	[Z]	Cytoskeleton	Actin OS=Gossypium hirsutum (Upland cotton) PE=3 SV=1	Actin [Gossypium arboreum]	--
Gorai.001G110500	8.60045	12.5184	13.5425	7.50568	3.74049	7.25792	15.018	9.34236	6.87527	4.23242	0.480791	-0.875575	normal	3.20901e-05	-1.84063	down	0.105655	-1.14238	normal	0.0112565	-1.17186	normal	[K]	Transcription	Cellular Component: cell wall (GO:0005618);; Biological Process: cell adhesion (GO:0007155);; Biological Process: response to salt stress (GO:0009651);; Biological Process: multidimensional cell growth (GO:0009825);; Biological Process: tissue development (GO:0009888);; Cellular Component: external side of plasma membrane (GO:0009897);; Biological Process: root morphogenesis (GO:0010015);; Biolog…	--	--	--	Fasciclin-like arabinogalactan protein 4 (Precursor) GN=F12A12.70 OS=Arabidopsis thaliana (Mouse-ear cress) PE=1 SV=1	fasciclin-like arabinogalactan protein 9 [Gossypium hirsutum]	--
Gorai.001G110700	0.927961	31.3203	21.04	18.1333	6.59393	0.993524	5.11364	4.56393	9.03661	5.61047	0.585653	-0.809985	normal	0.000176811	-1.70326	down	0.572484	0.786742	normal	0.923814	0.259513	normal	--	--	Biological Process: amino acid transmembrane transport (GO:0003333);; Cellular Component: vacuole (GO:0005773);; Biological Process: ion transport (GO:0006811);; Biological Process: response to cold (GO:0009409);; Biological Process: response to wounding (GO:0009611);; Cellular Component: chloroplast outer membrane (GO:0009707);; Biological Process: response to sucrose (GO:0009744);; Biological P…	--	--	--	Outer envelope pore protein 16, chloroplastic GN=OEP16 OS=Pisum sativum (Garden pea) PE=1 SV=1	Outer envelope pore 16, chloroplastic [Gossypium arboreum]	--
Gorai.001G111100	37.778	129.251	19.7473	3.21278	4.05495	24.5434	145.64	9.80953	22.2497	16.6615	0	-5.42859	down	1.14196e-08	-2.33764	down	5.87099e-11	-2.8029	down	0.263352	0.79103	normal	--	--	Molecular Function: structural constituent of cell wall (GO:0005199);; Cellular Component: extracellular region (GO:0005576);; Cellular Component: cytosol (GO:0005829);; Biological Process: syncytium formation (GO:0006949);; Cellular Component: plant-type cell wall (GO:0009505);; Cellular Component: plasmodesma (GO:0009506);; Cellular Component: chloroplast (GO:0009507);; Biological Process: plan…	--	--	--	Expansin-A6 (Precursor) GN=T9I4.3 OS=Arabidopsis thaliana (Mouse-ear cress) PE=2 SV=2	Expansin-A4 -like protein [Gossypium arboreum]	--
Gorai.001G111300	37.9039	17.1609	37.8878	63.8791	53.6195	23.5679	6.07847	24.447	25.1397	32.5157	0.000460999	1.8228	up	0.891267	0.484455	normal	3.21989e-06	2.13427	up	0.915606	0.356956	normal	--	--	Biological Process: cellular aromatic compound metabolic process (GO:0006725);; Cellular Component: chloroplast (GO:0009507);; Cellular Component: thylakoid (GO:0009579);; Biological Process: photosynthesis, light reaction (GO:0019684);; Biological Process: cellular nitrogen compound metabolic process (GO:0034641);; Biological Process: primary metabolic process (GO:0044238);; Biological Process: …	--	--	--	PGR5-like protein 1B, chloroplastic (Precursor) GN=PGRL1B OS=Arabidopsis thaliana (Mouse-ear cress) PE=1 SV=1	PGR5-like protein 1B, chloroplastic [Gossypium arboreum]	--
Gorai.001G111500	3.28956	2.23512	2.4526	8.79668	9.86846	5.10108	4.90673	5.62284	5.41816	5.05124	9.01466e-05	1.99806	up	5.19023e-06	1.90125	up	0.911238	0.166488	normal	0.942752	-0.14839	normal	--	--	Biological Process: respiratory burst involved in defense response (GO:0002679);; Molecular Function: protein binding (GO:0005515);; Biological Process: transcription, DNA-templated (GO:0006351);; Biological Process: regulation of transcription, DNA-templated (GO:0006355);; Biological Process: tryptophan metabolic process (GO:0006568);; Biological Process: multicellular organismal development (GO…	--	--	--	Scarecrow-like protein 14 GN=SCL14 OS=Arabidopsis thaliana (Mouse-ear cress) PE=2 SV=2	SCARECROW-like 14, putative [Theobroma cacao]	--
Gorai.001G112100	13.5911	37.8795	21.9257	15.3017	7.77268	13.983	31.5615	20.4971	25.9991	18.2732	0.0536198	-1.30728	normal	0.000907367	-1.53964	down	0.916807	-0.257436	normal	0.943151	-0.140058	normal	--	--	Cellular Component: chloroplast thylakoid membrane (GO:0009535);; Biological Process: leaf morphogenesis (GO:0009965);; Biological Process: cell differentiation (GO:0030154);; Biological Process: positive regulation of transcription, DNA-templated (GO:0045893);;	--	--	--	--	hypothetical protein F383_23137 [Gossypium arboreum]	--
Gorai.001G112200	0.382624	27.9789	4.335	8.2486	2.2068	0.11264	15.2707	10.1041	30.7931	5.98514	0.000389696	-1.84062	down	0.18024	-1.04469	normal	0.343591	0.970806	normal	0.278169	-0.787615	normal	--	--	Molecular Function: DNA binding (GO:0003677);; Molecular Function: sequence-specific DNA binding transcription factor activity (GO:0003700);; Molecular Function: protein binding (GO:0005515);; Cellular Component: nucleus (GO:0005634);; Biological Process: regulation of transcription, DNA-templated (GO:0006355);; Biological Process: circadian rhythm (GO:0007623);; Biological Process: chloroplast o…	--	--	--	Transcription factor LUX GN=F12A12.160 OS=Arabidopsis thaliana (Mouse-ear cress) PE=1 SV=1	Two-component response regulator ARR1 -like protein [Gossypium arboreum]	--
Gorai.001G112300	5.55225	23.1876	20.3034	11.0003	6.22359	10.5064	14.0879	18.3655	20.4002	12.3548	0.269547	-1.09601	normal	1.00652e-05	-1.803	down	0.883255	0.528596	normal	0.749978	-0.579634	normal	[M]	Cell wall/membrane/envelope biogenesis	Cellular Component: vacuolar membrane (GO:0005774);; Biological Process: intracellular protein transport (GO:0006886);; Biological Process: chloroplast organization (GO:0009658);; Biological Process: etioplast organization (GO:0009662);; Cellular Component: Toc complex (GO:0010006);; Biological Process: photosystem II assembly (GO:0010207);; Molecular Function: P-P-bond-hydrolysis-driven protein …	--	--	--	Protein TOC75-3, chloroplastic (Precursor) GN=T6H20.230 OS=Arabidopsis thaliana (Mouse-ear cress) PE=1 SV=1	Translocon at the outer envelope membrane of chloroplasts 75-III [Theobroma cacao]	--
Gorai.001G112600	188.018	177.809	315.618	132.565	96.2497	190.801	85.2378	234.847	149.612	148.223	0.973034	-0.453036	normal	8.04473e-05	-1.72195	down	0.788377	0.855014	normal	0.872362	-0.66172	normal	--	--	Molecular Function: nucleotide binding (GO:0000166);; Biological Process: pentose-phosphate shunt (GO:0006098);; Biological Process: rRNA processing (GO:0006364);; Cellular Component: plastid chromosome (GO:0009508);; Cellular Component: plastid envelope (GO:0009526);; Cellular Component: chloroplast thylakoid membrane (GO:0009535);; Biological Process: response to blue light (GO:0009637);; Biolo…	--	[G]	Carbohydrate transport and metabolism	Protein TIC 62, chloroplastic (Precursor) GN=TIC62 OS=Pisum sativum (Garden pea) PE=1 SV=2	Protein TIC 62, chloroplastic [Gossypium arboreum]	--
Gorai.001G114100	0.271718	1.39867	2.21704	0.365107	0	1.78805	1.57343	5.80971	3.46836	1.08505	0.627811	-1.51359	normal	0.000104228	-3.84158	down	0.399025	1.14987	normal	6.99328e-06	-2.30321	down	[O]	Posttranslational modification, protein turnover, chaperones	Cellular Component: nucleus (GO:0005634);; Cellular Component: cytoplasm (GO:0005737);; Biological Process: protein folding (GO:0006457);; Biological Process: response to stress (GO:0006950);; Biological Process: response to high light intensity (GO:0009644);; Biological Process: heat acclimation (GO:0010286);; Biological Process: response to endoplasmic reticulum stress (GO:0034976);; Biological…	K13993|2.13678e-72|mtr:MTR_4g091590|18.2 kDa class I heat shock protein; K13993 HSP20 family protein (A)	[O]	Posttranslational modification, protein turnover, chaperones	18.5 kDa class I heat shock protein GN=HSP18.5-C OS=Glycine max (Soybean) PE=3 SV=1	low molecular weight heat shock protein [Gossypium hirsutum]	Protein processing in endoplasmic reticulum (ko04141)
Gorai.001G114600	6.04827	21.2342	21.0123	8.01865	6.74824	6.96006	16.8541	15.2744	11.1784	9.38109	0.0254787	-1.40582	normal	0.000673621	-1.5544	down	0.818193	-0.496129	normal	0.276639	-0.795702	normal	--	--	Molecular Function: adenine nucleotide transmembrane transporter activity (GO:0000295);; Molecular Function: dicarboxylic acid transmembrane transporter activity (GO:0005310);; Molecular Function: purine ribonucleotide transmembrane transporter activity (GO:0005346);; Cellular Component: mitochondrial inner membrane (GO:0005743);; Cellular Component: vacuolar membrane (GO:0005774);; Cellular Comp…	K15103|0|tcc:TCM_041688|Mitochondrial uncoupling protein 3; K15103 solute carrier family 25 (mitochondrial uncoupling protein), member 8/9 (A)	[C]	Energy production and conversion	Mitochondrial uncoupling protein 2 GN=K19M22.16 OS=Arabidopsis thaliana (Mouse-ear cress) PE=2 SV=1	Mitochondrial uncoupling 2 [Gossypium arboreum]	--
Gorai.001G114800	3.36536	4.88527	4.1194	6.50768	11.2583	6.07003	5.03474	7.37597	8.0976	15.1375	0.838745	0.412377	normal	0.00502536	1.39659	up	0.526675	0.796196	normal	0.0461831	0.969913	normal	[RTKL]	--	Molecular Function: nucleotide binding (GO:0000166);; Molecular Function: guanylate cyclase activity (GO:0004383);; Molecular Function: protein serine/threonine kinase activity (GO:0004674);; Molecular Function: calmodulin-dependent protein kinase activity (GO:0004683);; Molecular Function: calmodulin binding (GO:0005516);; Cellular Component: nucleus (GO:0005634);; Cellular Component: plasma mem…	--	[T]	Signal transduction mechanisms	Calmodulin-binding receptor-like cytoplasmic kinase 1 GN=CRCK1 OS=Arabidopsis thaliana (Mouse-ear cress) PE=1 SV=1	hypothetical protein F383_25943 [Gossypium arboreum]	--
Gorai.001G116900	3.03754	16.0773	4.7	1.99617	1.86089	4.64562	32.116	7.29126	11.0218	4.63404	3.25922e-09	-2.96331	down	0.0533125	-1.3071	normal	0.00394573	-1.51075	down	0.592825	-0.670229	normal	--	--	Cellular Component: endosome (GO:0005768);; Cellular Component: vacuole (GO:0005773);; Cellular Component: endoplasmic reticulum (GO:0005783);; Cellular Component: Golgi apparatus (GO:0005794);; Cellular Component: trans-Golgi network (GO:0005802);; Cellular Component: plasma membrane (GO:0005886);; Biological Process: chromatin assembly or disassembly (GO:0006333);; Biological Process: meiosis I…	--	--	--	Protein PMR5 GN=MZN1.6 OS=Arabidopsis thaliana (Mouse-ear cress) PE=2 SV=1	Uncharacterized protein TCM_041593 [Theobroma cacao]	--
Gorai.001G117000	3.01178	7.7408	4.27223	1.57447	1.4095	3.68209	11.5972	5.89606	3.97581	3.42915	2.01299e-05	-2.22606	down	0.00395947	-1.56243	down	0.00478053	-1.50477	down	0.632297	-0.636767	normal	[E]	Amino acid transport and metabolism	Molecular Function: asparagine synthase (glutamine-hydrolyzing) activity (GO:0004066);; Molecular Function: aspartate-ammonia ligase activity (GO:0004071);; Molecular Function: ATP binding (GO:0005524);; Cellular Component: cytosol (GO:0005829);; Biological Process: glutamine metabolic process (GO:0006541);; Biological Process: cellular amino acid catabolic process (GO:0009063);; Cellular Compone…	K01953|0|tcc:TCM_041592|Glutamine-dependent asparagine synthase 1; K01953 asparagine synthase (glutamine-hydrolysing) [EC:6.3.5.4] (A)	[E]	Amino acid transport and metabolism	Asparagine synthetase [glutamine-hydrolyzing] 1 GN=T21L8.90 OS=Arabidopsis thaliana (Mouse-ear cress) PE=2 SV=2	Glutamine-dependent asparagine synthase 1 [Theobroma cacao]	Alanine, aspartate and glutamate metabolism (ko00250)
Gorai.001G117200	91.8039	13.9623	44.2326	89.4369	72.6126	64.5272	21.4512	37.0446	11.7716	24.8194	1.19866e-08	2.6577	up	0.79471	0.687247	normal	0.559202	-0.809825	normal	0.74098	-0.590372	normal	[PR]	--	Cellular Component: mitochondrion (GO:0005739);; Cellular Component: cytosol (GO:0005829);; Biological Process: gluconeogenesis (GO:0006094);; Biological Process: glycolytic process (GO:0006096);; Biological Process: transport (GO:0006810);; Biological Process: cell death (GO:0008219);; Molecular Function: 1-aminocyclopropane-1-carboxylate deaminase activity (GO:0008660);; Cellular Component: chl…	K13071|0|tcc:TCM_041583|Pheophorbide a oxygenase family protein with Rieske [2Fe-2S] domain; K13071 pheophorbide a oxygenase [EC:1.14.12.20] (A)	--	--	Pheophorbide a oxygenase, chloroplastic (Precursor) GN=F28D10_70 OS=Arabidopsis thaliana (Mouse-ear cress) PE=1 SV=1	Pheophorbide a oxygenase, chloroplastic -like protein [Gossypium arboreum]	Porphyrin and chlorophyll metabolism (ko00860)
Gorai.001G120200	8.18529	4.74039	14.2402	57.5069	33.6383	19.9491	3.83668	40.7273	47.0838	104.193	1.20459e-13	3.52446	up	0.00958335	1.29696	up	3.33067e-16	3.65676	up	0.000164	1.3114	up	--	--	Biological Process: cellular aromatic compound metabolic process (GO:0006725);; Biological Process: defense response (GO:0006952);; Biological Process: cell communication (GO:0007154);; Biological Process: response to organic substance (GO:0010033);; Biological Process: carboxylic acid metabolic process (GO:0019752);; Cellular Component: intracellular membrane-bounded organelle (GO:0043231);; Cel…	--	--	--	Protein LURP-one-related 8 GN=At2g38640 OS=Arabidopsis thaliana (Mouse-ear cress) PE=2 SV=1	hypothetical protein F383_28888 [Gossypium arboreum]	--
Gorai.001G120600	31.593	7.126	24.6669	55.6019	56.1968	33.7738	11.4296	18.6223	40.6162	48.4523	6.09082e-10	2.86922	up	0.150551	1.04308	normal	0.000188264	1.77229	up	6.2667e-05	1.36321	up	[RTKL]	--	Biological Process: microtubule cytoskeleton organization (GO:0000226);; Biological Process: cytokinesis by cell plate formation (GO:0000911);; Molecular Function: protein serine/threonine kinase activity (GO:0004674);; Molecular Function: ATP binding (GO:0005524);; Cellular Component: nucleolus (GO:0005730);; Cellular Component: vacuole (GO:0005773);; Biological Process: protein phosphorylation …	--	[R]	General function prediction only	Serine/threonine-protein kinase D6PKL2 GN=MCA23.7 OS=Arabidopsis thaliana (Mouse-ear cress) PE=1 SV=1	Kinase superfamily protein [Theobroma cacao]	--
Gorai.001G121200	10.7802	43.7172	49.2121	13.5213	7.60769	33.5878	30.6502	29.0437	43.6801	43.4601	0.00279015	-1.66145	down	7.45515e-13	-2.71516	down	0.898732	0.548619	normal	0.802073	0.576208	normal	[Q]	Secondary metabolites biosynthesis, transport and catabolism	Biological Process: mitotic cell cycle (GO:0000278);; Biological Process: double-strand break repair via homologous recombination (GO:0000724);; Molecular Function: sequence-specific DNA binding transcription factor activity (GO:0003700);; Molecular Function: protein binding (GO:0005515);; Cellular Component: nucleus (GO:0005634);; Cellular Component: endoplasmic reticulum (GO:0005783);; Cellular…	K13356|0|tcc:TCM_041453|Jojoba acyl CoA reductase-related male sterility protein; K13356 fatty acyl-CoA reductase [EC:1.2.1.-] (A)	[I]	Lipid transport and metabolism	Fatty acyl-CoA reductase 3 GN=T16L1.280 OS=Arabidopsis thaliana (Mouse-ear cress) PE=2 SV=1	Jojoba acyl CoA reductase-related male sterility protein [Theobroma cacao]	Cutin, suberine and wax biosynthesis (ko00073);; Peroxisome (ko04146)
Gorai.001G121500	11.8554	0.794239	0.824456	2.86121	4.11035	6.3508	1.12066	0.419568	0.89942	0.825718	0.102276	1.6329	normal	0.000720681	2.14263	up	0.941167	-0.275291	normal	--	--	--	--	--	Cellular Component: plasmodesma (GO:0009506);; Molecular Function: metal ion binding (GO:0046872);; Biological Process: response to stimulus (GO:0050896);;	--	[R]	General function prediction only	Zinc finger A20 and AN1 domain-containing stress-associated protein 3 GN=SAP3 OS=Arabidopsis thaliana (Mouse-ear cress) PE=2 SV=1	Zinc finger A20 and AN1 domain-containing stress-associated 3 -like protein [Gossypium arboreum]	--
Gorai.001G121600	3.39975	4.79415	1.44888	0.977305	0.859601	3.8135	5.30813	2.53918	4.07862	1.59368	0.000823108	-2.08024	down	0.722044	-1.01448	normal	0.821316	-0.446345	normal	0.922602	-0.337406	normal	--	--	Molecular Function: beta-galactoside (CMP) alpha-2,3-sialyltransferase activity (GO:0003836);; Biological Process: protein glycosylation (GO:0006486);; Cellular Component: integral component of Golgi membrane (GO:0030173);;	--	[G]	Carbohydrate transport and metabolism	--	sialyltransferase-like protein [Gossypium raimondii]	--
Gorai.001G123200	359.689	138.505	405.688	120.451	128.127	169.179	28.8047	158.527	109.769	101.879	0.945726	-0.294048	normal	4.13054e-05	-1.72103	down	5.0323e-05	1.88034	up	0.627417	-0.663191	normal	--	--	Cellular Component: mitochondrion (GO:0005739);; Biological Process: pentose-phosphate shunt (GO:0006098);; Biological Process: rRNA processing (GO:0006364);; Cellular Component: chloroplast (GO:0009507);; Cellular Component: photosystem I (GO:0009522);; Biological Process: plastid organization (GO:0009657);; Biological Process: photosynthesis, light harvesting in photosystem I (GO:0009768);; Bio…	K14332|1.9622e-78|tcc:TCM_041342|Photosystem I subunit O; K14332 photosystem I subunit PsaO (A)	--	--	Photosystem I subunit O (Precursor) GN=PSAO OS=Arabidopsis thaliana (Mouse-ear cress) PE=1 SV=1	DNA mismatch repair mutL [Gossypium arboreum]	Photosynthesis (ko00195)
Gorai.001G124800	1.7332	3.14972	2.72	0.97045	1.17403	1.34199	3.13301	1.85656	1.18634	1.55465	0.00487489	-1.65469	down	0.0491641	-1.19525	normal	0.0338778	-1.32526	normal	0.916053	-0.2505	normal	[RTKL]	--	Biological Process: cytokinesis by cell plate formation (GO:0000911);; Molecular Function: protein serine/threonine kinase activity (GO:0004674);; Molecular Function: ATP binding (GO:0005524);; Cellular Component: plasma membrane (GO:0005886);; Biological Process: DNA replication (GO:0006260);; Biological Process: chromatin silencing (GO:0006342);; Biological Process: protein complex assembly (GO…	K08857|0|tcc:TCM_041272|ATP binding protein, putative; K08857 NIMA (never in mitosis gene a)-related kinase [EC:2.7.11.1] (A)	[R]	General function prediction only	Serine/threonine-protein kinase Nek5 GN=F26G5.150 OS=Arabidopsis thaliana (Mouse-ear cress) PE=1 SV=1	Serine/threonine-protein kinase Nek5 [Gossypium arboreum]	--
Gorai.001G125600	18.3217	12.5732	3.89477	19.0243	16.4142	2.7282	8.57717	8.42557	1.38587	3.37031	0.756132	0.585396	normal	4.23593e-05	2.03129	up	0.000272297	-2.34841	down	0.0628443	-1.28576	normal	--	--	--	--	--	--	--	Uncharacterized protein isoform 4 [Theobroma cacao]	--
Gorai.001G126000	5.43252	3.11399	2.29713	5.99433	9.13043	2.82004	3.30958	1.00566	1.86745	2.19762	0.454534	0.899908	normal	1.27896e-05	1.95387	up	0.650009	-0.742714	normal	0.385973	1.04399	normal	--	--	--	--	--	--	Protein FAF-like, chloroplastic (Precursor) GN=At5g22090 OS=Arabidopsis thaliana (Mouse-ear cress) PE=2 SV=1	Chaperone DnaJ-domain superfamily protein [Theobroma cacao]	--
Gorai.001G126400	0.734856	35.644	14.9096	1.23899	0.967213	3.20452	27.3144	8.67099	11.2234	3.98619	1.11022e-16	-4.60029	down	6.40477e-12	-3.69764	down	0.0828729	-1.18801	normal	0.187095	-1.08433	normal	--	--	--	--	[R]	General function prediction only	--	Putative phosphatidylglycerol/phosphatidylinositol transfer [Gossypium arboreum]	--
Gorai.001G126900	1.26702	7.01839	4.62029	2.08248	0.94456	4.75502	6.51865	5.96579	12.1776	9.22557	0.00111035	-1.8658	down	2.02191e-05	-2.20474	down	0.365153	0.911139	normal	0.539632	0.671547	normal	[G]	Carbohydrate transport and metabolism	Cellular Component: nucleus (GO:0005634);; Cellular Component: vacuolar membrane (GO:0005774);; Cellular Component: endoplasmic reticulum (GO:0005783);; Cellular Component: plasma membrane (GO:0005886);; Biological Process: phosphate-containing compound metabolic process (GO:0006796);; Biological Process: cell proliferation (GO:0008283);; Biological Process: biosynthetic process (GO:0009058);; Ce…	--	[R]	General function prediction only	Protein STRICTOSIDINE SYNTHASE-LIKE 3 {ECO:0000303|PubMed:10777701} (Precursor) OS=Arabidopsis thaliana (Mouse-ear cress) PE=2 SV=1	Adipocyte plasma membrane-associated [Gossypium arboreum]	--
Gorai.001G127600	1.61027	4.83731	5.08043	1.09427	0.657747	0.0663003	0	0.0652124	0.148015	0	0.0309748	-1.7448	normal	1.83921e-06	-2.88619	down	--	--	--	--	--	--	[G]	Carbohydrate transport and metabolism	Biological Process: carbohydrate metabolic process (GO:0005975);; Biological Process: metabolic process (GO:0008152);; Molecular Function: beta-glucosidase activity (GO:0008422);; Molecular Function: hydrolase activity, acting on glycosyl bonds (GO:0016798);; Cellular Component: cell part (GO:0044464);;	K05349|0|cit:102614874|lysosomal beta glucosidase-like; K05349 beta-glucosidase [EC:3.2.1.21] (A)	--	--	Alpha-L-arabinofuranosidase (Precursor; Fragment) OS=Medicago sativa subsp. varia (Alfalfa) PE=1 SV=1	Glycosyl hydrolase family protein isoform 2 [Theobroma cacao]	Cyanoamino acid metabolism (ko00460);; Starch and sucrose metabolism (ko00500);; Phenylpropanoid biosynthesis (ko00940)
Gorai.001G127800	1.48076	21.7411	75.4211	41.196	34.7104	2.20419	7.97947	64.5737	57.7299	46.7163	0.82853	0.71841	normal	0.00192643	-1.4639	down	3.22373e-09	2.53771	up	0.21041	-0.877154	normal	[F]	Nucleotide transport and metabolism	Molecular Function: aldehyde oxidase activity (GO:0004031);; Molecular Function: iron ion binding (GO:0005506);; Cellular Component: cytosol (GO:0005829);; Molecular Function: electron carrier activity (GO:0009055);; Biological Process: abscisic acid biosynthetic process (GO:0009688);; Biological Process: auxin biosynthetic process (GO:0009851);; Molecular Function: abscisic aldehyde oxidase acti…	K09842|0|tcc:TCM_041158|ABA aldehyde oxidase isoform 1; K09842 abscisic-aldehyde oxidase [EC:1.2.3.14] (A)	[F]	Nucleotide transport and metabolism	Benzaldehyde dehydrogenase (NAD(+)) GN=T1G11.17 OS=Arabidopsis thaliana (Mouse-ear cress) PE=1 SV=2	ABA aldehyde oxidase isoform 1 [Theobroma cacao]	Carotenoid biosynthesis (ko00906)
Gorai.001G132500	23.1481	56.1365	51.8469	10.6946	10.7788	10.4177	29.743	21.9964	13.9252	10.3669	3.10476e-07	-2.4301	down	1.30785e-09	-2.328	down	0.161704	-1.09657	normal	0.0057893	-1.1088	down	[Z]	Cytoskeleton	Biological Process: polysaccharide biosynthetic process (GO:0000271);; Molecular Function: GTPase activity (GO:0003924);; Molecular Function: structural constituent of cytoskeleton (GO:0005200);; Molecular Function: GTP binding (GO:0005525);; Cellular Component: cell wall (GO:0005618);; Cellular Component: nucleolus (GO:0005730);; Cellular Component: cytoplasm (GO:0005737);; Cellular Component: v…	K07375|0|zma:100381281|uncharacterized LOC100381281; K07375 tubulin beta (A)	[Z]	Cytoskeleton	Tubulin beta-4 chain OS=Oryza sativa subsp. japonica (Rice) PE=2 SV=1	beta-tubulin 10 [Gossypium hirsutum]	Phagosome (ko04145)
Gorai.001G132700	2.19342	15.3351	11.8322	3.99045	1.08597	1.64791	6.36698	14.3743	8.88577	5.34807	0.000320794	-1.95765	down	4.77463e-12	-3.36468	down	0.803463	0.484712	normal	0.000332621	-1.44523	down	--	--	Biological Process: organelle organization (GO:0006996);; Biological Process: meiotic nuclear division (GO:0007126);; Biological Process: RNA modification (GO:0009451);; Cellular Component: intracellular membrane-bounded organelle (GO:0043231);; Cellular Component: cytoplasmic part (GO:0044444);; Biological Process: single-organism developmental process (GO:0044767);; Biological Process: system d…	--	[R]	General function prediction only	Pentatricopeptide repeat-containing protein At1g31790 GN=PCMP-A1 OS=Arabidopsis thaliana (Mouse-ear cress) PE=2 SV=1	Pentatricopeptide repeat-containing protein, putative [Theobroma cacao]	--
Gorai.001G133800	1.95811	6.40989	3.47275	1.05491	1.04361	1.6521	1.76333	1.73611	1.3593	0.570569	1.62856e-07	-2.74413	down	7.58647e-05	-2.02959	down	0.844867	-0.438128	normal	0.0305663	-1.69342	normal	[M]	Cell wall/membrane/envelope biogenesis	Molecular Function: phospholipase C activity (GO:0004629);; Cellular Component: vacuole (GO:0005773);; Cellular Component: cytosol (GO:0005829);; Cellular Component: plasma membrane (GO:0005886);; Biological Process: glycolipid biosynthetic process (GO:0009247);; Biological Process: phospholipid catabolic process (GO:0009395);; Cellular Component: plasmodesma (GO:0009506);; Biological Process: ce…	K01114|0|tcc:TCM_040916|Non-specific phospholipase C2; K01114 phospholipase C [EC:3.1.4.3] (A)	--	--	Non-specific phospholipase C2 (Precursor) GN=NPC2 OS=Arabidopsis thaliana (Mouse-ear cress) PE=2 SV=1	Phospholipase C 3 [Gossypium arboreum]	Inositol phosphate metabolism (ko00562);; Glycerophospholipid metabolism (ko00564);; Ether lipid metabolism (ko00565)
Gorai.001G134100	5.89741	2.4602	2.04578	6.6266	11.7579	4.93793	3.94659	3.50481	2.92343	6.6344	0.0458998	1.34931	normal	6.50484e-09	2.39877	up	0.808984	-0.473763	normal	0.197384	0.857239	normal	--	--	Biological Process: cell adhesion (GO:0007155);; Biological Process: anatomical structure morphogenesis (GO:0009653);; Biological Process: response to auxin (GO:0009733);; Biological Process: response to gibberellin (GO:0009739);; Biological Process: epidermal cell differentiation (GO:0009913);; Biological Process: xylem and phloem pattern formation (GO:0010051);; Biological Process: trichome mor…	--	--	--	Protein LATERAL ROOT PRIMORDIUM 1 GN=LRP1 OS=Arabidopsis thaliana (Mouse-ear cress) PE=1 SV=1	tRNA-dihydrouridine(16/17) synthase [NAD (P)(+)]-like protein [Gossypium arboreum]	--
Gorai.001G135100	7.9121	31.2953	22.0259	12.0038	8.59941	10.9158	26.163	25.0846	21.8961	13.9859	0.0336908	-1.36691	normal	0.00428099	-1.39046	down	0.918752	-0.210602	normal	0.159736	-0.848953	normal	[P]	Inorganic ion transport and metabolism	Biological Process: protein peptidyl-prolyl isomerization (GO:0000413);; Molecular Function: peptidyl-prolyl cis-trans isomerase activity (GO:0003755);; Cellular Component: chloroplast (GO:0009507);; Molecular Function: isomerase activity (GO:0016853);;	--	[H]	Coenzyme transport and metabolism	Rhodanese-like/PpiC domain-containing protein 12 GN=At5g19370 OS=Arabidopsis thaliana (Mouse-ear cress) PE=2 SV=1	Rhodanese-like domain-containing protein / PPIC-type PPIASE domain-containing protein isoform 1 [Theobroma cacao]	--
Gorai.001G135600	32.8876	7.18049	13.0691	25.213	29.6748	41.2677	12.7848	6.61136	14.378	20.1114	0.000225736	1.88786	up	0.0202789	1.22537	normal	0.911733	0.288493	normal	6.99315e-07	1.64477	up	[E]	Amino acid transport and metabolism	Molecular Function: hydroxymethylglutaryl-CoA lyase activity (GO:0004419);; Cellular Component: mitochondrion (GO:0005739);; Biological Process: leucine metabolic process (GO:0006551);; Molecular Function: transferase activity (GO:0016740);; Biological Process: carboxylic acid biosynthetic process (GO:0046394);; Biological Process: organonitrogen compound biosynthetic process (GO:1901566);;	K01640|0|tcc:TCM_040868|Aldolase superfamily protein isoform 1; K01640 hydroxymethylglutaryl-CoA lyase [EC:4.1.3.4] (A)	[CE]	--	Hydroxymethylglutaryl-CoA lyase, mitochondrial GN=HMGCL OS=Arabidopsis thaliana (Mouse-ear cress) PE=1 SV=2	Aldolase superfamily protein isoform 1 [Theobroma cacao]	Synthesis and degradation of ketone bodies (ko00072);; Valine, leucine and isoleucine degradation (ko00280);; Butanoate metabolism (ko00650);; Peroxisome (ko04146)
Gorai.001G136200	280.038	1021.1	261.283	40.8197	38.0058	260.723	832.087	166.526	179.518	179.775	0	-4.63862	down	3.47389e-13	-2.74975	down	3.82348e-06	-2.11184	down	0.978781	0.100925	normal	--	--	Molecular Function: protein binding (GO:0005515);; Cellular Component: extracellular region (GO:0005576);; Cellular Component: plasma membrane (GO:0005886);; Cellular Component: plasmodesma (GO:0009506);; Biological Process: response to salt stress (GO:0009651);; Biological Process: response to abscisic acid (GO:0009737);; Biological Process: gibberellic acid mediated signaling pathway (GO:000974…	--	--	--	Protein GAST1 (Precursor) GN=GAST1 OS=Solanum lycopersicum (Tomato) PE=2 SV=1	GASA-like protein [Gossypium hirsutum]	--
Gorai.001G136800	1.34533	3.84489	1.30686	0.344614	0.458908	3.31106	4.49328	0.223331	1.94966	1.14348	0.000419791	-2.98355	down	--	--	--	0.570138	-1.00659	normal	--	--	--	[O]	Posttranslational modification, protein turnover, chaperones	Biological Process: microtubule cytoskeleton organization (GO:0000226);; Biological Process: cytokinesis by cell plate formation (GO:0000911);; Molecular Function: ubiquitin-protein transferase activity (GO:0004842);; Cellular Component: nucleus (GO:0005634);; Cellular Component: cytoplasm (GO:0005737);; Cellular Component: cytosol (GO:0005829);; Cellular Component: plasma membrane (GO:0005886);;…	K06688|5.09736e-123|tcc:TCM_040797|Ubiquitin-conjugating enzyme19 isoform 1; K06688 ubiquitin-conjugating enzyme E2 C [EC:6.3.2.19] (A)	[O]	Posttranslational modification, protein turnover, chaperones	Ubiquitin-conjugating enzyme E2 20 GN=UBC20 OS=Arabidopsis thaliana (Mouse-ear cress) PE=2 SV=1	Ubiquitin-conjugating enzyme E2 19 -like protein [Gossypium arboreum]	Ubiquitin mediated proteolysis (ko04120)
Gorai.001G139000	21.8709	56.1119	26.3302	11.9684	13.3044	54.551	94.5283	31.3034	32.1417	43.8147	0.00071921	-1.78414	down	0.495673	-0.772704	normal	0.0871521	-1.18472	normal	0.961882	-0.0050844	normal	--	--	--	--	--	--	--	hypothetical protein ARALYDRAFT_495450 [Arabidopsis lyrata subsp. lyrata]	--
Gorai.001G139200	71.7645	8.97372	20.7674	69.7894	69.5253	89.0353	13.3665	10.9072	20.66	37.8311	7.22244e-12	3.15585	up	0.000120779	1.64084	up	0.473046	0.875791	normal	9.57778e-09	1.78736	up	--	--	Cellular Component: chloroplast (GO:0009507);;	--	--	--	--	Protein zntA [Gossypium arboreum]	--
Gorai.001G140500	2.87571	4.33825	4.94964	1.27497	1.1347	1.66525	1.41015	0.554003	1.3901	1.46735	0.00378998	-1.77525	down	1.54476e-05	-2.08738	down	0.90404	0.0112893	normal	0.210502	1.35162	normal	--	--	Molecular Function: enzyme inhibitor activity (GO:0004857);; Cellular Component: extracellular region (GO:0005576);; Cellular Component: cell wall (GO:0005618);; Cellular Component: plant-type cell wall (GO:0009505);; Biological Process: proline transport (GO:0015824);; Biological Process: regulation of metabolic process (GO:0019222);; Molecular Function: pectinesterase activity (GO:0030599);; Bi…	K01051|0|pop:POPTR_0002s20370g|POPTRDRAFT_799194; hypothetical protein; K01051 pectinesterase [EC:3.1.1.11] (A)	--	--	Pectinesterase 40 (Precursor) GN=T14P8.1 OS=Arabidopsis thaliana (Mouse-ear cress) PE=2 SV=1	putative pectinesterase/pectinesterase inhibitor 40 -like protein [Gossypium arboreum]	Pentose and glucuronate interconversions (ko00040);; Starch and sucrose metabolism (ko00500)
Gorai.001G142100	10.8432	14.5352	10.1214	3.59804	3.45257	9.80175	16.2115	5.1622	3.34001	3.12655	2.40534e-05	-2.12686	down	5.85936e-05	-1.7604	down	5.73714e-08	-2.44724	down	0.216105	-0.873756	normal	--	--	Cellular Component: endoplasmic reticulum (GO:0005783);; Cellular Component: Golgi apparatus (GO:0005794);; Biological Process: tryptophan catabolic process (GO:0006569);; Biological Process: protein targeting to membrane (GO:0006612);; Biological Process: response to oxidative stress (GO:0006979);; Biological Process: response to wounding (GO:0009611);; Biological Process: response to fungus (GO…	--	--	--	Probable galacturonosyltransferase-like 7 GN=GATL7 OS=Arabidopsis thaliana (Mouse-ear cress) PE=2 SV=1	Galacturonosyltransferase-like 7 isoform 1 [Theobroma cacao]	--
Gorai.001G143200	2.20945	1.633	0.570055	0.0806772	0.783909	2.45752	7.05094	0.429398	0.388856	0.41781	6.77101e-06	-3.57561	down	0.937228	0.282214	normal	3.01981e-14	-4.0028	down	--	--	--	[KAD]	--	Molecular Function: DNA binding (GO:0003677);; Molecular Function: chromatin binding (GO:0003682);; Molecular Function: sequence-specific DNA binding transcription factor activity (GO:0003700);; Cellular Component: nucleus (GO:0005634);; Biological Process: polyamine catabolic process (GO:0006598);; Biological Process: oligopeptide transport (GO:0006857);; Biological Process: response to water de…	K09422|3.27983e-176|tcc:TCM_004777|MYB-like DNA-binding domain protein; K09422 myb proto-oncogene protein, plant (A)	[K]	Transcription	Myb-related protein P GN=P OS=Zea mays (Maize) PE=2 SV=1	MYB-like DNA-binding domain protein [Gossypium hirsutum]	--
Gorai.001G143300	30.4662	29.9395	13.3672	4.62598	6.21886	50.0189	18.2254	3.97218	5.6336	6.50385	7.31508e-09	-2.72352	down	0.0901159	-1.06325	normal	0.00185936	-1.58504	down	0.47241	0.709435	normal	--	--	Biological Process: response to stress (GO:0006950);;	--	--	--	--	DnaJ subfamily C member 7 [Gossypium arboreum]	--
Gorai.001G146400	0.893068	8.43949	7.97738	12.6128	2.73585	0.138183	0.423658	0.607971	0.831183	1.0966	0.802717	0.522574	normal	0.00570098	-1.46403	down	0.919156	0.729512	normal	0.901185	0.883094	normal	[IQR]	--	Molecular Function: nucleotide binding (GO:0000166);; Molecular Function: copper ion binding (GO:0005507);; Cellular Component: extracellular region (GO:0005576);; Cellular Component: cytosol (GO:0005829);; Biological Process: proline biosynthetic process (GO:0006561);; Molecular Function: 2,3-dihydro-2,3-dihydroxybenzoate dehydrogenase activity (GO:0008667);; Biological Process: response to heat…	--	[R]	General function prediction only	Short-chain dehydrogenase reductase 3b GN=F14M4 OS=Arabidopsis thaliana (Mouse-ear cress) PE=2 SV=1	hypothetical protein F383_00912 [Gossypium arboreum]	--
Gorai.001G148600	7.63648	1.22615	3.22581	13.1596	10.6016	9.01552	0.44897	4.31708	2.9281	8.93936	1.80592e-10	3.25656	up	0.000828607	1.58705	up	0.000202282	2.41504	up	0.0592839	1.00671	normal	--	--	--	--	--	--	--	hypothetical protein F383_10664 [Gossypium arboreum]	--
Gorai.001G148700	18.3969	4.44225	5.31096	16.6836	22.5847	2.38364	1.04388	0.982318	2.24613	3.24153	0.000191496	1.96935	up	2.29589e-07	2.15684	up	0.723516	0.944573	normal	0.00275927	1.92662	up	[R]	General function prediction only	Biological Process: metabolic process (GO:0008152);; Biological Process: response to nitrate (GO:0010167);; Biological Process: nitrate transport (GO:0015706);; Molecular Function: hydrolase activity (GO:0016787);;	K18551|2.4527e-159|tcc:TCM_004969|Haloacid dehalogenase-like hydrolase superfamily protein; K18551 pyrimidine and pyridine-specific 5'-nucleotidase [EC:3.1.3.-] (A)	[R]	General function prediction only	--	putative C24B11.05 [Gossypium arboreum]	Nicotinate and nicotinamide metabolism (ko00760)
Gorai.001G150900	0.668388	1.64135	1.32717	5.63186	8.08677	5.08112	7.36092	10.4244	10.3289	24.3108	0.00876698	1.6708	up	7.05166e-08	2.49942	up	0.806897	0.503101	normal	0.00189133	1.19037	up	--	--	Biological Process: very long-chain fatty acid metabolic process (GO:0000038);; Biological Process: sulfur amino acid metabolic process (GO:0000096);; Biological Process: polysaccharide biosynthetic process (GO:0000271);; Cellular Component: extracellular region (GO:0005576);; Cellular Component: nucleus (GO:0005634);; Cellular Component: endoplasmic reticulum (GO:0005783);; Biological Process: a…	K15397|0|tcc:TCM_005053|3-ketoacyl-CoA synthase 1; K15397 3-ketoacyl-CoA synthase [EC:2.3.1.199] (A)	--	--	3-ketoacyl-CoA synthase 1 GN=T25K16.11 OS=Arabidopsis thaliana (Mouse-ear cress) PE=2 SV=1	3-ketoacyl-CoA synthase 17 [Gossypium raimondii]	Fatty acid elongation (ko00062)
Gorai.001G151700	0	4.07165	0.660055	0.165238	0.0427044	0.0962939	0.439579	0.0484576	0.703775	0.0819624	9.41263e-10	-4.16336	down	--	--	--	0.92995	0.608435	normal	--	--	--	--	--	Molecular Function: binding (GO:0005488);; Molecular Function: protein binding (GO:0005515);; Biological Process: regulation of transcription, DNA-templated (GO:0006355);; Biological Process: metabolic process (GO:0008152);; Biological Process: response to salt stress (GO:0009651);; Biological Process: anatomical structure morphogenesis (GO:0009653);; Biological Process: epidermal cell differenti…	K13422|0|tcc:TCM_005064|Basic helix-loop-helix DNA-binding family protein; K13422 transcription factor MYC2 (A)	--	--	Transcription factor MYC3 GN=MZA15.18 OS=Arabidopsis thaliana (Mouse-ear cress) PE=1 SV=1	Basic helix-loop-helix DNA-binding family protein [Theobroma cacao]	Plant hormone signal transduction (ko04075)
Gorai.001G151900	1.78161	7.63185	5.08455	1.55835	0.859397	0.108565	0.65548	1.07617	1.09941	0.460409	0.00148435	-2.26891	down	0.00195229	-2.41985	down	--	--	--	--	--	--	--	--	--	K17868|5.88702e-78|tcc:TCM_012103|Transducin/WD40 repeat-like superfamily protein isoform 1; K17868 diphthamide biosynthesis protein 7 (A)	[E]	Amino acid transport and metabolism	--	WD repeat-containing 85 [Gossypium arboreum]	--
Gorai.001G152300	13.8996	18.649	29.7883	12.9631	9.95698	2.65941	2.8524	4.85088	6.60264	6.38388	0.810141	-0.484051	normal	0.00243304	-1.47835	down	0.217542	1.26109	normal	0.92093	0.33382	normal	--	--	Molecular Function: binding (GO:0005488);; Molecular Function: protein binding (GO:0005515);; Cellular Component: vacuole (GO:0005773);; Cellular Component: endoplasmic reticulum membrane (GO:0005789);; Cellular Component: cytosol (GO:0005829);; Cellular Component: plasma membrane (GO:0005886);; Biological Process: tryptophan catabolic process (GO:0006569);; Biological Process: nitric oxide biosy…	--	[C]	Energy production and conversion	Cytochrome b5 GN=CYB5 OS=Brassica oleracea var. botrytis (Cauliflower) PE=1 SV=1	Cytochrome b5 [Gossypium arboreum]	--
Gorai.001G153000	5.44851	10.3325	5.07424	1.95656	2.19482	3.51922	10.3116	1.72781	5.8454	1.83288	5.87062e-06	-2.37012	down	0.0792941	-1.20747	normal	0.557553	-0.7742	normal	0.949031	0.0609624	normal	--	--	--	--	--	--	--	NC domain-containing protein-related [Theobroma cacao]	--
Gorai.001G153300	2.13407	0.674594	0.427701	1.25086	4.10426	1.38035	2.26851	1.13711	2.71831	2.3799	0.880049	0.849875	normal	9.8973e-06	2.82564	up	0.900261	0.182773	normal	0.771715	0.889046	normal	--	--	Molecular Function: sequence-specific DNA binding transcription factor activity (GO:0003700);; Cellular Component: nucleus (GO:0005634);; Biological Process: response to light stimulus (GO:0009416);; Biological Process: determination of bilateral symmetry (GO:0009855);; Biological Process: polarity specification of adaxial/abaxial axis (GO:0009944);; Biological Process: meristem initiation (GO:00…	--	--	--	Dof zinc finger protein DOF2.5 GN=F13A10.12 OS=Arabidopsis thaliana (Mouse-ear cress) PE=2 SV=3	F-box family protein, putative isoform 1 [Theobroma cacao]	--
Gorai.001G153800	2.20912	4.7697	2.00296	0.150214	0.720792	0.267595	5.18743	0.980399	1.46022	0.314295	8.03735e-12	-4.51297	down	0.148104	-1.39379	normal	0.00426264	-1.67961	down	0.616313	-1.39613	normal	--	--	--	--	--	--	Uncharacterized protein At4g00950 GN=At4g00950 OS=Arabidopsis thaliana (Mouse-ear cress) PE=2 SV=1	hypothetical protein F383_21896 [Gossypium arboreum]	--
Gorai.001G154400	69.5837	62.673	76.9364	38.237	31.0951	45.7219	88.3358	26.6036	68.2579	31.4564	0.739685	-0.81155	normal	0.00585209	-1.35044	down	0.959723	-0.366559	normal	0.96221	0.20929	normal	--	--	Molecular Function: aspartic-type endopeptidase activity (GO:0004190);; Cellular Component: extracellular region (GO:0005576);; Cellular Component: endoplasmic reticulum (GO:0005783);; Biological Process: proteolysis (GO:0006508);; Biological Process: defense response (GO:0006952);; Biological Process: response to water deprivation (GO:0009414);; Cellular Component: plant-type cell wall (GO:00095…	--	[O]	Posttranslational modification, protein turnover, chaperones	Protein ASPARTIC PROTEASE IN GUARD CELL 2 (Precursor) GN=ASPG2 OS=Arabidopsis thaliana (Mouse-ear cress) PE=2 SV=1	Eukaryotic aspartyl protease family protein isoform 2 [Theobroma cacao]	--
Gorai.001G155000	75.4227	77.4035	101.693	47.6624	38.6827	130.832	44.1157	36.0385	111.02	119.689	0.852808	-0.713148	normal	0.00586201	-1.36341	down	0.0265432	1.37472	normal	4.94025e-09	1.79331	up	--	--	Molecular Function: diacylglycerol O-acyltransferase activity (GO:0004144);; Cellular Component: endoplasmic reticulum (GO:0005783);; Biological Process: wax biosynthetic process (GO:0010025);; Biological Process: glycerolipid biosynthetic process (GO:0045017);; Molecular Function: long-chain-alcohol O-fatty-acyltransferase activity (GO:0047196);; Biological Process: ovule development (GO:0048481…	--	--	--	O-acyltransferase WSD1 GN=WSD1 OS=Arabidopsis thaliana (Mouse-ear cress) PE=2 SV=1	O-acyltransferase WSD1 -like protein [Gossypium arboreum]	--
Gorai.001G155200	4.41613	5.0878	3.07778	0.181509	1.69385	1.93513	4.36771	0	1.16519	1.7922	0.000158099	-3.46909	down	0.901924	-0.772643	normal	0.280827	-1.60196	normal	--	--	--	--	--	Biological Process: response to stress (GO:0006950);; Biological Process: response to abiotic stimulus (GO:0009628);; Biological Process: response to oxygen-containing compound (GO:1901700);;	--	--	--	Probable non-specific lipid-transfer protein 2 (Precursor) OS=Parietaria judaica (Pellitory-of-the-wall) PE=1 SV=1	Bifunctional inhibitor/lipid-transfer protein/seed storage 2S albumin superfamily protein, putative [Theobroma cacao]	--
Gorai.001G155500	9.01109	9.66427	14.6506	7.09906	4.09374	9.88234	4.06635	11.4211	9.46084	6.13189	0.881462	-0.432185	normal	4.4076e-05	-1.71238	down	0.048132	1.23797	normal	0.0718712	-0.916278	normal	--	--	Molecular Function: endonuclease activity (GO:0004519);; Cellular Component: chloroplast (GO:0009507);; Biological Process: phloem or xylem histogenesis (GO:0010087);; Biological Process: leaf vascular tissue pattern formation (GO:0010305);; Biological Process: cotyledon vascular tissue pattern formation (GO:0010588);; Biological Process: mRNA modification (GO:0016556);; Biological Process: chlor…	--	[R]	General function prediction only	Pentatricopeptide repeat-containing protein At4g01030, mitochondrial (Precursor) GN=PCMP-H65 OS=Arabidopsis thaliana (Mouse-ear cress) PE=3 SV=2	hypothetical protein CICLE_v10023767mg [Citrus clementina]	--
Gorai.001G155800	19.6718	6.71817	3.51826	14.767	22.3673	5.40389	18.039	12.891	6.19906	5.75559	0.168906	1.12922	normal	1.20932e-10	2.6332	up	0.00855945	-1.44777	down	0.00797709	-1.15545	down	--	--	Biological Process: immune effector process (GO:0002252);; Molecular Function: protein binding (GO:0005515);; Cellular Component: nucleus (GO:0005634);; Cellular Component: cytoplasm (GO:0005737);; Biological Process: nitric oxide mediated signal transduction (GO:0007263);; Biological Process: systemic acquired resistance (GO:0009627);; Biological Process: response to abiotic stimulus (GO:0009628…	--	--	--	Probable WRKY transcription factor 46 GN=WRKY46 OS=Arabidopsis thaliana (Mouse-ear cress) PE=2 SV=1	WRKY56 [Gossypium aridum]	--
Gorai.001G156300	3.16955	5.98833	3.86425	14.5103	11.0391	1.51358	2.13496	5.78487	6.81707	5.78719	0.1151	1.2088	normal	0.00448032	1.36325	up	0.000763931	1.68387	up	0.951751	-0.0375186	normal	--	--	Biological Process: response to hormone (GO:0009725);; Biological Process: response to hexose (GO:0009746);; Cellular Component: intracellular part (GO:0044424);; Biological Process: root development (GO:0048364);; Biological Process: regulation of biological process (GO:0050789);;	--	--	--	Uncharacterized protein At5g05190 GN=Y-1 OS=Arabidopsis thaliana (Mouse-ear cress) PE=1 SV=1	Uncharacterized protein isoform 1 [Theobroma cacao]	--
Gorai.001G156600	30.8025	27.3228	27.4858	73.2276	121.872	61.4589	34.231	42.9124	34.2018	60.7459	0.0412554	1.40486	normal	1.04278e-07	2.08986	up	0.965506	0.0105971	normal	0.917516	0.484394	normal	--	--	Molecular Function: ATP binding (GO:0005524);; Cellular Component: nucleus (GO:0005634);; Cellular Component: vacuole (GO:0005773);; Biological Process: red, far-red light phototransduction (GO:0009585);; Biological Process: systemic acquired resistance (GO:0009627);; Biological Process: photomorphogenesis (GO:0009640);; Biological Process: jasmonic acid metabolic process (GO:0009694);; Biologica…	K14506|0|tcc:TCM_005190|Indole-3-acetic acid-amido synthetase GH3.5 isoform 2; K14506 jasmonic acid-amino synthetase (A)	--	--	Probable indole-3-acetic acid-amido synthetase GH3.5 GN=OSJNBa0009C07.16 OS=Oryza sativa subsp. japonica (Rice) PE=2 SV=1	putative indole-3-acetic acid-amido synthetase GH3.5 [Gossypium arboreum]	Plant hormone signal transduction (ko04075)
Gorai.001G156800	26.1205	2.2174	4.08499	6.75052	18.2055	23.1644	2.04363	0.231743	0.622018	2.63379	0.0127459	1.60116	normal	2.02218e-07	2.18481	up	0.265228	-1.44857	normal	2.09098e-06	3.16117	up	--	--	Molecular Function: protein binding (GO:0005515);; Cellular Component: integral component of chloroplast outer membrane (GO:0031359);; Biological Process: plastid fission (GO:0043572);;	--	--	--	Plastid division protein PDV2 GN=PDV2 OS=Arabidopsis thaliana (Mouse-ear cress) PE=1 SV=1	Plastid division PDV2 -like protein [Gossypium arboreum]	--
Gorai.001G156900	3.30452	0.748513	1.82696	9.51303	16.6255	1.12519	0.29884	1.07895	1.55753	3.75599	2.02961e-10	3.52484	up	2.92655e-13	3.15141	up	0.037348	2.16951	normal	0.00219955	1.72159	up	--	--	Biological Process: MAPK cascade (GO:0000165);; Molecular Function: DNA binding (GO:0003677);; Molecular Function: sequence-specific DNA binding transcription factor activity (GO:0003700);; Molecular Function: protein binding (GO:0005515);; Cellular Component: nucleolus (GO:0005730);; Cellular Component: cytoplasm (GO:0005737);; Biological Process: protein targeting to membrane (GO:0006612);; Bio…	--	--	--	Ethylene-responsive transcription factor CRF6 GN=F15G16.20 OS=Arabidopsis thaliana (Mouse-ear cress) PE=1 SV=1	AP2/ERF domain-containing transcription factor, putative [Theobroma cacao]	--
Gorai.001G157300	19.662	7.4453	15.7815	43.802	35.4951	19.8639	4.436	17.1342	22.029	25.6176	1.66169e-07	2.50827	up	0.0549667	1.12059	normal	4.6855e-07	2.33562	up	0.692542	0.578803	normal	[M]	Cell wall/membrane/envelope biogenesis	Biological Process: RNA methylation (GO:0001510);; Molecular Function: DNA binding (GO:0003677);; Molecular Function: ATP binding (GO:0005524);; Cellular Component: nucleolus (GO:0005730);; Cellular Component: cytosol (GO:0005829);; Cellular Component: plasma membrane (GO:0005886);; Biological Process: purine nucleotide biosynthetic process (GO:0006164);; Biological Process: DNA metabolic process…	--	[P]	Inorganic ion transport and metabolism	Protein Ycf2 {ECO:0000255|HAMAP-Rule:MF_01330} OS=Oenothera parviflora (Small-flowered evening primrose) PE=3 SV=1	Putative late blight resistance R1A-3 [Gossypium arboreum]	--
Gorai.001G158100	7.68623	54.5995	74.3955	275.861	181.402	7.60989	21.6612	74.9932	430.853	355.814	2.27432e-06	2.31751	up	0.0315506	1.26314	normal	0	4.34235	up	4.38538e-14	2.22984	up	--	--	Molecular Function: iron ion binding (GO:0005506);; Molecular Function: protein binding (GO:0005515);; Cellular Component: endoplasmic reticulum (GO:0005783);; Biological Process: glucose catabolic process (GO:0006007);; Biological Process: fatty acid biosynthetic process (GO:0006633);; Biological Process: sphingolipid metabolic process (GO:0006665);; Cellular Component: chloroplast outer membran…	K13076|0|tcc:TCM_005234|Fatty acid/sphingolipid desaturase; K13076 delta8-fatty-acid desaturase [EC:1.14.19.4] (A)	[I]	Lipid transport and metabolism	Delta(8)-fatty-acid desaturase 2 GN=SLD2 OS=Arabidopsis thaliana (Mouse-ear cress) PE=1 SV=1	Fatty acid/sphingolipid desaturase [Theobroma cacao]	--
Gorai.001G158500	43.6833	33.7141	39.0096	10.323	18.2478	95.8152	29.5741	45.1883	42.4286	41.6663	0.00118353	-1.73873	down	0.0242057	-1.21913	normal	0.909455	0.520007	normal	0.981164	-0.138534	normal	[RTKL]	--	Biological Process: activation of MAPKK activity (GO:0000186);; Molecular Function: protein serine/threonine kinase activity (GO:0004674);; Molecular Function: MAP kinase kinase kinase activity (GO:0004709);; Molecular Function: ATP binding (GO:0005524);; Cellular Component: nucleus (GO:0005634);; Cellular Component: plasma membrane (GO:0005886);; Biological Process: polysaccharide metabolic proc…	--	[T]	Signal transduction mechanisms	Probable serine/threonine-protein kinase At1g01540 GN=At1g01540 OS=Arabidopsis thaliana (Mouse-ear cress) PE=1 SV=2	hypothetical protein F383_28408 [Gossypium arboreum]	--
Gorai.001G161800	1.17663	0.851811	1.82771	3.65534	2.05519	1.33867	1.21019	2.39798	2.38738	1.38794	0.00686308	1.88539	up	0.920766	0.0423441	normal	0.655176	0.870734	normal	0.80546	-0.693377	normal	--	--	Molecular Function: RNA binding (GO:0003723);; Cellular Component: ribosome (GO:0005840);; Cellular Component: plastid (GO:0009536);;	K02986|4.58715e-67|vvi:7498552|rps4, ViviM_p108; ribosomal protein S4; K02986 small subunit ribosomal protein S4 (A)	--	--	Ribosomal protein S4, mitochondrial GN=RPS4 OS=Arabidopsis thaliana (Mouse-ear cress) PE=2 SV=2	PREDICTED: LOW QUALITY PROTEIN: ribosomal protein S4, mitochondrial [Sesamum indicum]	Ribosome (ko03010)
Gorai.001G161900	2.996	1.56156	3.15976	6.01677	2.33552	3.42462	1.70024	3.70393	1.46177	1.35307	0.00152032	1.8439	up	0.832111	-0.460964	normal	0.896656	-0.177049	normal	0.00605723	-1.42577	down	[J]	Translation, ribosomal structure and biogenesis	Molecular Function: structural constituent of ribosome (GO:0003735);; Cellular Component: mitochondrion (GO:0005739);; Cellular Component: ribosome (GO:0005840);; Biological Process: translation (GO:0006412);; Cellular Component: chloroplast (GO:0009507);; Molecular Function: rRNA binding (GO:0019843);;	K02954|1.48966e-56|pda:103707805|ribosomal protein S14, mitochondrial; K02954 small subunit ribosomal protein S14 (A)	[J]	Translation, ribosomal structure and biogenesis	Ribosomal protein S14, mitochondrial GN=RPS14 OS=Vicia faba (Broad bean) PE=3 SV=2	PREDICTED: ribosomal protein S14, mitochondrial [Tarenaya hassleriana]	Ribosome (ko03010)
Gorai.001G162000	2.96791	2.98902	2.46315	10.2874	3.54204	4.1651	5.20508	6.2044	4.63967	3.74975	0.00350017	1.74856	up	0.885007	0.371128	normal	0.884138	-0.182686	normal	0.62773	-0.721099	normal	[C]	Energy production and conversion	Biological Process: polysaccharide biosynthetic process (GO:0000271);; Biological Process: polysaccharide catabolic process (GO:0000272);; Molecular Function: iron ion binding (GO:0005506);; Cellular Component: mitochondrial inner membrane (GO:0005743);; Cellular Component: mitochondrial respiratory chain complex III (GO:0005750);; Biological Process: starch metabolic process (GO:0005982);; Biolo…	K00412|0|eus:EUTSA_v10001270mg|hypothetical protein; K00412 ubiquinol-cytochrome c reductase cytochrome b subunit (A)	[C]	Energy production and conversion	Cytochrome b GN=MT-CYB OS=Vicia faba (Broad bean) PE=3 SV=2	apocytochrome b (mitochondrion) [Gossypium hirsutum]	Oxidative phosphorylation (ko00190)
Gorai.001G164500	3.46714	1.88776	2.84488	6.38032	3.53525	2.59768	1.62871	3.21357	2.26135	2.21367	0.0012369	1.72957	up	0.913734	0.243538	normal	0.820122	0.468661	normal	0.748385	-0.536878	normal	--	--	Cellular Component: mitochondrial proton-transporting ATP synthase complex, coupling factor F(o) (GO:0000276);; Molecular Function: ATP binding (GO:0005524);; Cellular Component: vacuole (GO:0005773);; Cellular Component: chloroplast (GO:0009507);; Molecular Function: hydrogen ion transmembrane transporter activity (GO:0015078);; Biological Process: ATP synthesis coupled proton transport (GO:0015…	K02109|3.13208e-72|mdm:13630196|atp8, C3258_p34; atp8; K02109 F-type H+-transporting ATPase subunit b (A)	--	--	ATP synthase protein YMF19 GN=YMF19 OS=Arabidopsis thaliana (Mouse-ear cress) PE=1 SV=1	ATPase subunit 8 (mitochondrion) [Gossypium hirsutum]	Oxidative phosphorylation (ko00190);; Photosynthesis (ko00195)
Gorai.001G164800	2.51328	2.08135	4.92051	0.958875	0.665986	1.74987	0.920036	3.2537	0.325617	0.335429	0.186454	-1.19915	normal	8.61814e-11	-2.86694	down	0.19109	-1.43515	normal	1.46549e-13	-3.16813	down	--	--	Cellular Component: mitochondrion (GO:0005739);;	--	--	--	--	conserved hypothetical protein [Ricinus communis]	--
Gorai.001G165200	1.83835	1.47382	2.65221	0.87709	0.632934	1.31342	0.708785	2.49511	0.374931	0.294252	0.670975	-0.790569	normal	0.000122173	-2.01705	down	0.818415	-0.811268	normal	9.67896e-10	-2.93868	down	--	--	Cellular Component: mitochondrion (GO:0005739);; Cellular Component: chloroplast (GO:0009507);; Cellular Component: membrane (GO:0016020);; Molecular Function: oxidoreductase activity (GO:0016491);; Biological Process: oxidation-reduction process (GO:0055114);;	K05577|1.86317e-11|mtr:MTR_7g021740|A subunit of NADH dehydrogenase; K05577 NAD(P)H-quinone oxidoreductase subunit 5 [EC:1.6.5.3] (A)	--	--	--	hypothetical protein BevumaM_p133 [Beta vulgaris subsp. maritima]	Oxidative phosphorylation (ko00190)
Gorai.001G165500	1.08682	0.48673	1.23714	0.413176	0.362647	0.541447	0.343391	1.43316	0.0972196	0.192518	0.906123	-0.314482	normal	0.00621889	-1.77214	down	0.654778	-1.49809	normal	1.97207e-07	-2.75646	down	--	--	Cellular Component: mitochondrion (GO:0005739);;	--	--	--	--	orf42 gene product (mitochondrion) [Daucus carota subsp. sativus]	--
Gorai.001G173700	0.0487155	2.21819	2.18553	1.96755	0.343343	0	0.218685	2.43121	1.07873	1.35122	0.891313	-0.145823	normal	0.000406595	-2.49934	down	0.215235	1.96839	normal	0.604466	-0.872735	normal	[MG]	--	Molecular Function: RNA binding (GO:0003723);; Molecular Function: catalytic activity (GO:0003824);; Molecular Function: calmodulin binding (GO:0005516);; Cellular Component: nucleus (GO:0005634);; Cellular Component: endoplasmic reticulum (GO:0005783);; Biological Process: tRNA modification (GO:0006400);; Biological Process: response to osmotic stress (GO:0006970);; Biological Process: circadian…	--	[V]	Defense mechanisms	Vestitone reductase OS=Medicago sativa (Alfalfa) PE=1 SV=1	Dihydroflavonol-4-reductase [Gossypium arboreum]	--
Gorai.001G173900	8.59872	18.0632	8.16685	5.08208	4.0029	7.54148	22.5988	12.7173	7.95085	6.4084	0.000712912	-1.8136	down	0.101973	-1.10145	normal	0.0109005	-1.41267	normal	0.0328323	-1.03091	normal	[MG]	--	Biological Process: alternative mRNA splicing, via spliceosome (GO:0000380);; Molecular Function: double-stranded DNA binding (GO:0003690);; Molecular Function: single-stranded DNA binding (GO:0003697);; Molecular Function: mRNA binding (GO:0003729);; Molecular Function: protein kinase activity (GO:0004672);; Molecular Function: calmodulin binding (GO:0005516);; Cellular Component: cell wall (GO:…	--	[V]	Defense mechanisms	Vestitone reductase OS=Medicago sativa (Alfalfa) PE=1 SV=1	Dihydroflavonol-4-reductase [Gossypium arboreum]	--
Gorai.001G175800	119.915	4.26494	15.9475	15.3533	49.9953	47.0039	6.87268	5.08871	2.69134	7.43158	0.00401501	1.75157	up	0.000370959	1.58393	up	0.208185	-1.2663	normal	0.859931	0.507558	normal	--	--	--	--	--	--	--	Late cornified envelope protein 1E [Theobroma cacao]	--
Gorai.001G176000	12.4509	11.3632	12.2095	4.15161	12.1539	4.57916	7.6506	3.44612	2.29735	2.77775	0.00802336	-1.55599	down	0.93451	0.0289861	normal	0.00229215	-1.64495	down	0.894683	-0.352546	normal	--	--	Biological Process: developmental process involved in reproduction (GO:0003006);; Molecular Function: DNA binding (GO:0003677);; Molecular Function: sequence-specific DNA binding transcription factor activity (GO:0003700);; Cellular Component: nucleus (GO:0005634);; Biological Process: regulation of transcription, DNA-templated (GO:0006355);; Biological Process: multicellular organismal developme…	--	--	--	Squamosa promoter-binding-like protein 8 GN=SPL8 OS=Arabidopsis thaliana (Mouse-ear cress) PE=1 SV=2	Squamosa promoter-binding-like protein 8 [Gossypium arboreum]	--
Gorai.001G177500	3.23191	21.1413	17.9131	0.795795	0.335387	6.88009	23.0661	6.00113	8.6784	3.78372	2.22045e-16	-4.54221	down	0	-5.3913	down	0.0175422	-1.36986	normal	0.724287	-0.651992	normal	--	--	--	--	[U]	Intracellular trafficking, secretion, and vesicular transport	--	Uroporphyrinogen decarboxylase [Gossypium arboreum]	--
Gorai.001G178100	0.435389	0	0.161466	0.0732041	2.33584	0.193361	0.0868421	0	0.118193	0	--	--	--	6.92599e-05	3.27766	up	--	--	--	--	--	--	--	--	Cellular Component: nucleus (GO:0005634);; Cellular Component: mitochondrion (GO:0005739);; Cellular Component: plastid (GO:0009536);; Biological Process: response to blue light (GO:0009637);; Biological Process: unidimensional cell growth (GO:0009826);; Biological Process: determination of bilateral symmetry (GO:0009855);; Biological Process: polarity specification of adaxial/abaxial axis (GO:00…	--	--	--	Protein LIGHT-DEPENDENT SHORT HYPOCOTYLS 4 GN=LSH4 OS=Arabidopsis thaliana (Mouse-ear cress) PE=1 SV=1	IQ motif and SEC7 domain-containing protein 2 [Theobroma cacao]	--
Gorai.001G180400	1.77866	3.87817	1.29498	0.173178	0.40841	4.22314	26.0025	2.40686	0.919453	1.78348	1.7343e-06	-3.7046	down	0.677475	-1.50949	normal	0	-4.58194	down	0.933424	-0.424401	normal	--	--	Biological Process: defense response to insect (GO:0002213);; Molecular Function: acid phosphatase activity (GO:0003993);; Cellular Component: vacuole (GO:0005773);; Biological Process: response to oxidative stress (GO:0006979);; Biological Process: response to wounding (GO:0009611);; Cellular Component: cytosolic ribosome (GO:0022626);; Biological Process: hyperosmotic salinity response (GO:0042…	--	--	--	Acid phosphatase 1 (Precursor) GN=APS1 OS=Solanum lycopersicum (Tomato) PE=2 SV=1	Acid phosphatase 1 [Gossypium arboreum]	--
Gorai.001G180600	24.9708	16.4701	22.7199	66.2276	26.5432	26.2654	11.3215	17.5253	26.5274	19.4171	8.70364e-05	1.98982	up	0.907167	0.197834	normal	0.0606376	1.23533	normal	0.935586	0.109721	normal	--	--	Molecular Function: magnesium ion binding (GO:0000287);; Molecular Function: electron carrier activity (GO:0009055);; Cellular Component: chloroplast (GO:0009507);; Cellular Component: photosystem I (GO:0009522);; Cellular Component: chloroplast thylakoid membrane (GO:0009535);; Biological Process: photosynthesis (GO:0015979);; Cellular Component: integral component of membrane (GO:0016021);; Mol…	K02690|2.1434e-60|rcu:RCOM_2029740|hypothetical protein; K02690 photosystem I P700 chlorophyll a apoprotein A2 (A)	--	--	Photosystem I P700 chlorophyll a apoprotein A2 {ECO:0000255|HAMAP-Rule:MF_00482} OS=Glycine max (Soybean) PE=3 SV=1	PsaB, partial (chloroplast) [Calanthe brevicornu]	Photosynthesis (ko00195)
Gorai.001G182000	2.22083	2.47875	1.86889	3.03207	6.97062	2.42402	3.94624	2.56226	3.62588	3.50228	0.858886	0.30655	normal	0.000123445	1.7999	up	0.895853	-0.0407512	normal	0.832945	0.483102	normal	[K]	Transcription	--	--	--	--	--	Leucine-rich repeat receptor-like protein kinase [Theobroma cacao]	--
Gorai.001G183800	28.7017	85.0482	53.2539	18.2859	2.14281	130.325	76.5905	6.59709	62.7136	40.279	1.58161e-06	-2.31269	down	0	-4.83352	down	0.895745	-0.48521	normal	3.59712e-14	2.53243	up	--	--	Molecular Function: binding (GO:0005488);; Cellular Component: plant-type cell wall (GO:0009505);;	--	--	--	Vegetative cell wall protein gp1 (Precursor) GN=GP1 OS=Chlamydomonas reinhardtii (Chlamydomonas smithii) PE=1 SV=1	Uncharacterized protein TCM_003075 [Theobroma cacao]	--
Gorai.001G185700	0.708366	1.49475	1.13164	3.53794	5.20347	10.6683	1.04043	3.11443	1.15131	8.03661	0.262677	1.1934	normal	7.07755e-05	2.12315	up	0.928931	0.159772	normal	0.0028834	1.33737	up	--	--	Cellular Component: nucleus (GO:0005634);; Biological Process: DNA replication initiation (GO:0006270);; Biological Process: regulation of DNA replication (GO:0006275);; Biological Process: DNA methylation (GO:0006306);; Biological Process: regulation of sulfur utilization (GO:0006792);; Biological Process: purine nucleobase transport (GO:0006863);; Biological Process: cell proliferation (GO:0008…	--	--	--	Protein SULFUR DEFICIENCY-INDUCED 1 {ECO:0000303|PubMed:19154231} OS=Arabidopsis thaliana (Mouse-ear cress) PE=2 SV=1	putative UDP-N-acetylglucosamine--peptide N-acetylglucosaminyltransferase SEC -like protein [Gossypium arboreum]	--
Gorai.001G186000	33.2889	10.2882	26.3591	32.8913	33.783	37.1766	12.0912	29.5689	21.5295	31.671	0.0026229	1.6553	up	0.905917	0.361205	normal	0.397878	0.891267	normal	0.961819	0.0784755	normal	[U]	Intracellular trafficking, secretion, and vesicular transport	Cellular Component: endosome (GO:0005768);; Cellular Component: vacuolar membrane (GO:0005774);; Cellular Component: endoplasmic reticulum (GO:0005783);; Cellular Component: Golgi apparatus (GO:0005794);; Cellular Component: plasma membrane (GO:0005886);; Biological Process: protein targeting to vacuole (GO:0006623);; Biological Process: vacuole organization (GO:0007033);; Cellular Component: cel…	K08511|6.0451e-139|tcc:TCM_002981|Vesicle-associated membrane protein 726; K08511 vesicle-associated membrane protein 72 (A)	[U]	Intracellular trafficking, secretion, and vesicular transport	Vesicle-associated membrane protein 722 GN=F25I18.14 OS=Arabidopsis thaliana (Mouse-ear cress) PE=2 SV=2	Vesicle-associated membrane protein 726 [Theobroma cacao]	--
Gorai.001G187500	5.58546	8.90188	7.25052	2.02658	2.39776	5.41672	9.47364	8.01987	3.48874	4.31517	8.48275e-05	-2.11481	down	0.00094269	-1.64066	down	0.032229	-1.32569	normal	0.103881	-0.946374	normal	--	--	--	--	--	--	Protein XRI1 GN=XRI1 OS=Arabidopsis thaliana (Mouse-ear cress) PE=1 SV=2	X-ray induced transcript 1, putative [Theobroma cacao]	--
Gorai.001G188300	23.3637	3.50522	5.20856	25.3231	20.2706	13.7076	7.69304	4.27589	5.43189	4.31077	6.39319e-09	2.80356	up	3.01705e-06	1.96542	up	0.826763	-0.435267	normal	0.937723	-0.00813703	normal	--	--	Molecular Function: DNA binding (GO:0003677);; Molecular Function: sequence-specific DNA binding transcription factor activity (GO:0003700);; Biological Process: regulation of transcription, DNA-templated (GO:0006355);;	--	--	--	Ethylene-responsive transcription factor-like protein At4g13040 GN=At4g13040 OS=Arabidopsis thaliana (Mouse-ear cress) PE=2 SV=2	Integrase-type DNA-binding superfamily protein isoform 1 [Theobroma cacao]	--
Gorai.001G188500	34.0039	58.9359	50.4346	15.2388	18.1379	35.669	59.067	43.8235	28.2441	28.1204	2.83723e-05	-2.07783	down	0.000721017	-1.50582	down	0.479553	-0.950843	normal	0.78925	-0.582739	normal	--	--	Cellular Component: mitochondrion (GO:0005739);; Cellular Component: endosome (GO:0005768);; Cellular Component: Golgi apparatus (GO:0005794);; Cellular Component: trans-Golgi network (GO:0005802);; Biological Process: pollen development (GO:0009555);; Biological Process: pollen tube growth (GO:0009860);; Biological Process: regulation of meristem growth (GO:0010075);; Biological Process: homogal…	K13648|0|tcc:TCM_002828|Nucleotide-diphospho-sugar transferases superfamily protein; K13648 alpha-1,4-galacturonosyltransferase [EC:2.4.1.43] (A)	--	--	Galacturonosyltransferase 8 GN=MJL12.8 OS=Arabidopsis thaliana (Mouse-ear cress) PE=1 SV=1	Galacturonosyltransferase 8 -like protein [Gossypium arboreum]	Starch and sucrose metabolism (ko00500);; Amino sugar and nucleotide sugar metabolism (ko00520)
Gorai.001G190000	3.15781	8.45381	1.57195	2.58902	1.97488	1.65493	15.1767	2.23687	3.21475	2.23674	0.00582404	-1.61043	down	0.870952	0.396451	normal	4.32322e-06	-2.13685	down	0.938801	-0.0713873	normal	--	--	Molecular Function: protein binding (GO:0005515);; Cellular Component: intracellular (GO:0005622);; Cellular Component: nucleus (GO:0005634);; Cellular Component: plasma membrane (GO:0005886);; Biological Process: regulation of transcription, DNA-templated (GO:0006355);; Biological Process: response to osmotic stress (GO:0006970);; Biological Process: organelle organization (GO:0006996);; Biologi…	--	--	--	Zinc finger protein CONSTANS-LIKE 9 GN=COL9 OS=Arabidopsis thaliana (Mouse-ear cress) PE=2 SV=1	Zinc finger CONSTANS-LIKE 9 -like protein [Gossypium arboreum]	--
Gorai.001G191200	50.9103	14.3198	27.6437	58.7477	55.3554	59.9622	13.8024	37.5846	35.6416	47.7078	0.00021494	1.90518	up	0.529636	0.846476	normal	0.011065	1.41625	normal	0.963402	0.330575	normal	[R]	General function prediction only	Cellular Component: chloroplast (GO:0009507);; Molecular Function: transferase activity, transferring phosphorus-containing groups (GO:0016772);; Biological Process: macromolecule metabolic process (GO:0043170);; Biological Process: cellular metabolic process (GO:0044237);; Biological Process: regulation of catalytic activity (GO:0050790);;	--	[R]	General function prediction only	Uncharacterized aarF domain-containing protein kinase At1g79600, chloroplastic (Precursor) GN=At1g79600 OS=Arabidopsis thaliana (Mouse-ear cress) PE=2 SV=1	Uncharacterized protein F383_16816 [Gossypium arboreum]	--
Gorai.001G192000	1224.93	797.06	3583.95	3147.01	1611.24	1485.33	58.7727	1748.98	4246.41	3272.16	0.000953603	1.95601	up	0.406395	-1.1705	normal	0	6.2345	up	0.543504	0.944735	normal	--	--	Cellular Component: plasma membrane (GO:0005886);; Cellular Component: photosystem I (GO:0009522);; Cellular Component: photosystem II (GO:0009523);; Cellular Component: chloroplast thylakoid membrane (GO:0009535);; Biological Process: response to blue light (GO:0009637);; Biological Process: photosynthesis, light harvesting (GO:0009765);; Cellular Component: chloroplast envelope (GO:0009941);; B…	K08913|0|tcc:TCM_002333|Photosystem II light harvesting complex gene 2.1; K08913 light-harvesting complex II chlorophyll a/b binding protein 2 (A)	--	--	Chlorophyll a-b binding protein 151, chloroplastic (Precursor) GN=CAB-151 OS=Gossypium hirsutum (Upland cotton) PE=2 SV=2	Photosystem II light harvesting complex gene 2.1 [Theobroma cacao]	Photosynthesis - antenna proteins (ko00196)
Gorai.001G193600	13.6294	0.798923	0.994836	9.65182	16.9122	4.89405	1.78417	3.2603	4.26828	3.26039	1.81101e-10	3.45031	up	0	3.96806	up	0.111427	1.26868	normal	0.938677	-0.0476917	normal	--	--	Cellular Component: extracellular region (GO:0005576);; Cellular Component: plasma membrane (GO:0005886);; Biological Process: protein targeting to membrane (GO:0006612);; Biological Process: multicellular organismal development (GO:0007275);; Cellular Component: plasmodesma (GO:0009506);; Biological Process: response to insect (GO:0009625);; Biological Process: systemic acquired resistance, sali…	--	[T]	Signal transduction mechanisms	Cytochrome b561 and DOMON domain-containing protein At5g35735 (Precursor) GN=At5g35735 OS=Arabidopsis thaliana (Mouse-ear cress) PE=2 SV=1	Auxin-induced in root cultures 12 -like protein [Gossypium arboreum]	--
Gorai.001G194400	9.82225	7.5017	11.0541	1.59383	4.47567	11.624	11.7948	3.529	5.45816	4.64524	0.000823108	-2.08024	down	0.0823962	-1.16436	normal	0.333618	-0.961094	normal	0.917792	0.326083	normal	[M]	Cell wall/membrane/envelope biogenesis	Cellular Component: Golgi apparatus (GO:0005794);; Biological Process: acetyl-CoA metabolic process (GO:0006084);; Cellular Component: plant-type cell wall (GO:0009505);; Cellular Component: plasmodesma (GO:0009506);; Biological Process: plant-type cell wall organization (GO:0009664);; Biological Process: plant-type cell wall biogenesis (GO:0009832);; Biological Process: regulation of meristem gr…	--	--	--	Fasciclin-like arabinogalactan protein 7 (Precursor) GN=FLA7 OS=Arabidopsis thaliana (Mouse-ear cress) PE=1 SV=1	Fasciclin-like arabinogalactan protein 7 [Gossypium arboreum]	--
Gorai.001G195700	0.77663	2.54815	1.46824	0.790544	0.566309	0.70895	2.92814	2.04108	2.32893	1.01101	0.00761086	-1.7059	down	0.163778	-1.25566	normal	0.877395	-0.25049	normal	0.387121	-0.889312	normal	--	--	Cellular Component: nuclear chromatin (GO:0000790);; Molecular Function: RNA binding (GO:0003723);; Cellular Component: nucleus (GO:0005634);; Cellular Component: nucleolus (GO:0005730);; Biological Process: DNA methylation (GO:0006306);; Biological Process: chromatin silencing (GO:0006342);; Biological Process: sister chromatid cohesion (GO:0007062);; Biological Process: meiotic nuclear division…	K11593|0|tcc:TCM_002192|Eukaryotic translation initiation factor 2c, putative isoform 1; K11593 eukaryotic translation initiation factor 2C (A)	[J]	Translation, ribosomal structure and biogenesis	Protein argonaute 16 OS=Oryza sativa subsp. japonica (Rice) PE=2 SV=2	hypothetical protein F383_20383 [Gossypium arboreum]	--
Gorai.001G196100	0.66041	2.27612	1.43587	0.377258	0.355069	0.407031	0.955681	0.517756	0.9774	0.753423	0.000391498	-2.41548	down	0.0198703	-1.91278	normal	0.918759	0.0423851	normal	0.952106	0.492869	normal	--	--	--	--	--	--	--	Sorting nexin-4 [Gossypium arboreum]	--
Gorai.001G196200	13.514	5.11629	4.26463	17.2862	29.0839	7.35994	6.87977	3.82034	7.43181	7.38489	0.000646152	1.79261	up	2.97651e-13	2.82018	up	0.902607	0.220595	normal	0.0414226	1.00859	normal	--	--	--	--	--	--	--	G1/S-specific cyclin-E [Gossypium arboreum]	--
Gorai.001G200100	12.3235	23.5999	19.1064	9.9117	6.98944	22.5922	19.8754	12.183	10.4547	6.29705	0.0859258	-1.26095	normal	0.00179002	-1.43179	down	0.499192	-0.866448	normal	0.0486903	-0.956359	normal	[S]	Function unknown	Molecular Function: protein serine/threonine kinase activity (GO:0004674);; Molecular Function: phosphoprotein phosphatase activity (GO:0004721);; Cellular Component: nucleus (GO:0005634);; Cellular Component: plasma membrane (GO:0005886);; Biological Process: defense response (GO:0006952);; Biological Process: epidermis development (GO:0008544);; Biological Process: response to light stimulus (G…	--	[R]	General function prediction only	Plant intracellular Ras-group-related LRR protein 4 GN=PIRL4 OS=Arabidopsis thaliana (Mouse-ear cress) PE=1 SV=1	Leucine-rich repeat-containing 40 [Gossypium arboreum]	--
Gorai.001G201200	1.9817	5.89845	4.26099	0.912642	0.843165	4.3936	7.93158	10.4381	5.63132	2.95647	0.000129364	-2.53025	down	0.002397	-2.14801	down	0.836899	-0.407409	normal	3.6037e-05	-1.7918	down	--	--	Cellular Component: chromatin (GO:0000785);; Cellular Component: nucleosome (GO:0000786);; Molecular Function: DNA binding (GO:0003677);; Cellular Component: nucleus (GO:0005634);; Biological Process: nucleosome assembly (GO:0006334);; Biological Process: regulation of transcription, DNA-templated (GO:0006355);; Biological Process: cellular macromolecule metabolic process (GO:0044260);; Biologica…	--	--	--	HMG-Y-related protein A OS=Glycine max (Soybean) PE=2 SV=1	HMG-Y-related A [Gossypium arboreum]	--
Gorai.001G201300	175.761	94.9127	167.026	689.839	205.833	201.42	70.997	135.58	250.008	150.156	2.1061e-07	2.69423	up	0.898754	0.199964	normal	0.019865	1.65193	normal	0.931341	-0.288788	normal	--	--	Cellular Component: photosystem II (GO:0009523);; Cellular Component: chloroplast thylakoid membrane (GO:0009535);; Biological Process: photosynthetic electron transport chain (GO:0009767);; Cellular Component: integral component of membrane (GO:0016021);; Molecular Function: chlorophyll binding (GO:0016168);; Biological Process: protein-chromophore linkage (GO:0018298);;	K02704|2.03945e-36|sbi:SORBI_03g020131|SORBIDRAFT_03g020131, Sb03g020131; hypothetical protein; K02704 photosystem II CP47 chlorophyll apoprotein (A)	--	--	Photosystem II CP47 reaction center protein {ECO:0000255|HAMAP-Rule:MF_01495} OS=Vitis vinifera (Grape) PE=3 SV=1	hypothetical protein SORBIDRAFT_03g020131 [Sorghum bicolor]	Photosynthesis (ko00195)
Gorai.001G202000	2.14317	7.72547	6.8767	1.69967	1.38893	2.98068	5.85254	3.04605	5.3127	2.75545	0.000323237	-2.10606	down	1.71467e-05	-2.21732	down	0.892788	-0.0606422	normal	0.940997	-0.151292	normal	[M]	Cell wall/membrane/envelope biogenesis	Molecular Function: UDP-N-acetylmuramate dehydrogenase activity (GO:0008762);; Molecular Function: flavin adenine dinucleotide binding (GO:0050660);; Biological Process: oxidation-reduction process (GO:0055114);;	--	--	--	--	UDP-N-acetylenolpyruvoylglucosamine reductase [Gossypium arboreum]	--
Gorai.001G202800	1.722	2.64431	3.02893	0.543734	0.644858	0.547821	1.21089	1.55554	1.04426	0.311826	0.000610779	-2.12664	down	4.04021e-05	-2.11966	down	0.901614	-0.0809812	normal	0.000265717	-2.16378	down	--	--	Biological Process: developmental process involved in reproduction (GO:0003006);; Molecular Function: protein binding (GO:0005515);; Cellular Component: cytosol (GO:0005829);; Biological Process: response to blue light (GO:0009637);; Biological Process: post-embryonic development (GO:0009791);; Biological Process: chloroplast avoidance movement (GO:0009903);; Biological Process: chloroplast accum…	--	--	--	Protein PLASTID MOVEMENT IMPAIRED 2 GN=F4N21.22 OS=Arabidopsis thaliana (Mouse-ear cress) PE=1 SV=1	plastid movement impaired 2 -like protein [Gossypium arboreum]	--
Gorai.001G203300	48.8646	18.5359	24.6362	138.424	144.418	18.0862	15.0252	30.1758	15.8815	22.6472	9.05348e-10	2.83643	up	1.18447e-10	2.45128	up	0.935143	0.0456086	normal	0.887641	-0.446142	normal	[E]	Amino acid transport and metabolism	Molecular Function: glutamate-ammonia ligase activity (GO:0004356);; Molecular Function: ATP binding (GO:0005524);; Cellular Component: cytoplasm (GO:0005737);; Cellular Component: cytosol (GO:0005829);; Biological Process: glutamine biosynthetic process (GO:0006542);; Biological Process: nitrogen fixation (GO:0009399);; Biological Process: response to sucrose (GO:0009744);; Biological Process: r…	K01915|0|tcc:TCM_017447|Glutamine synthase clone R1, 1,ATGLN1,1 isoform 1; K01915 glutamine synthetase [EC:6.3.1.2] (A)	[E]	Amino acid transport and metabolism	Glutamine synthetase cytosolic isozyme 1 GN=GS1-1 OS=Vitis vinifera (Grape) PE=2 SV=1	glutamine synthetase [Gossypium raimondii]	Alanine, aspartate and glutamate metabolism (ko00250);; Arginine and proline metabolism (ko00330);; Glyoxylate and dicarboxylate metabolism (ko00630);; Nitrogen metabolism (ko00910);; Biosynthesis of amino acids (ko01230)
Gorai.001G203500	1.41458	0.511566	0.339769	9.99416	20.3085	0	1.22867	0.207797	6.37518	5.27108	2.21285e-06	3.67643	up	1.24345e-14	5.10486	up	0.0171856	2.19453	normal	0.000493464	3.36798	up	--	--	--	--	--	--	--	Uncharacterized protein TCM_019590 [Theobroma cacao]	--
Gorai.001G203900	2.24965	3.71962	4.0035	1.00576	2.53621	2.83543	5.72286	0.52743	1.38023	1.76189	0.00169149	-1.84822	down	0.5586	-0.738656	normal	4.96896e-05	-2.02192	down	0.00437638	1.66341	up	[RTKL]	--	Biological Process: polysaccharide catabolic process (GO:0000272);; Biological Process: respiratory burst involved in defense response (GO:0002679);; Molecular Function: structural constituent of ribosome (GO:0003735);; Molecular Function: protein serine/threonine kinase activity (GO:0004674);; Molecular Function: ATP binding (GO:0005524);; Cellular Component: extracellular region (GO:0005576);; …	--	--	--	Probable inactive receptor kinase At1g48480 (Precursor) GN=RKL1 OS=Arabidopsis thaliana (Mouse-ear cress) PE=2 SV=1	putative inactive receptor kinase -like protein [Gossypium arboreum]	--
Gorai.001G204900	2.4048	10.7673	5.2432	2.02295	1.37206	4.07962	5.29286	3.31054	4.86441	1.55465	2.60496e-06	-2.3752	down	0.000332164	-1.79374	down	0.900258	-0.105512	normal	0.116492	-1.06529	normal	--	--	Cellular Component: extracellular region (GO:0005576);; Cellular Component: endoplasmic reticulum (GO:0005783);; Biological Process: carbohydrate metabolic process (GO:0005975);; Biological Process: chromatin silencing (GO:0006342);; Biological Process: cell communication (GO:0007154);; Cellular Component: plant-type cell wall (GO:0009505);; Cellular Component: plasmodesma (GO:0009506);; Biologic…	--	--	--	Glucan endo-1,3-beta-glucosidase 2 (Precursor) GN=At1g66250 OS=Arabidopsis thaliana (Mouse-ear cress) PE=1 SV=2	hypothetical protein F383_07126 [Gossypium arboreum]	--
Gorai.001G206000	292.566	38.7104	88.36	126.824	162.719	84.2407	18.7031	50.3323	79.0146	108.142	0.00179517	1.73487	up	0.440272	0.950807	normal	1.08303e-06	2.15988	up	0.00507309	1.12768	up	[E]	Amino acid transport and metabolism	Biological Process: amino acid transport (GO:0006865);; Molecular Function: amino acid transmembrane transporter activity (GO:0015171);; Cellular Component: integral component of membrane (GO:0016021);;	K14207|0|tcc:TCM_019056|Transmembrane amino acid transporter family protein isoform 1; K14207 solute carrier family 38 (sodium-coupled neutral amino acid transporter), member 2 (A)	[E]	Amino acid transport and metabolism	Amino acid permease 8 GN=AAP8 OS=Arabidopsis thaliana (Mouse-ear cress) PE=1 SV=1	putative sodium-coupled neutral amino acid transporter 6 [Gossypium arboreum]	--
Gorai.001G206300	5.36025	8.48445	7.8332	2.20385	3.18028	5.09211	6.95402	3.02688	4.28494	4.224	0.000373893	-1.9114	down	0.0160336	-1.28567	normal	0.73186	-0.608195	normal	0.791178	0.520542	normal	--	--	Cellular Component: endosome (GO:0005768);; Cellular Component: Golgi apparatus (GO:0005794);; Cellular Component: trans-Golgi network (GO:0005802);;	--	--	--	Uncharacterized protein At1g04910 GN=At1g04910 OS=Arabidopsis thaliana (Mouse-ear cress) PE=2 SV=1	hypothetical protein F383_03841 [Gossypium arboreum]	--
Gorai.001G206400	38.7044	25.7065	33.3589	153.647	43.5499	53.8288	18.7903	34.823	64.0835	45.9843	5.32743e-08	2.55422	up	0.92358	0.365146	normal	0.000114684	1.81203	up	0.918035	0.394297	normal	[G]	Carbohydrate transport and metabolism	Molecular Function: magnesium ion binding (GO:0000287);; Molecular Function: monooxygenase activity (GO:0004497);; Cellular Component: chloroplast (GO:0009507);; Biological Process: photorespiration (GO:0009853);; Molecular Function: ribulose-bisphosphate carboxylase activity (GO:0016984);; Biological Process: reductive pentose-phosphate cycle (GO:0019253);; Biological Process: oxidation-reductio…	K01601|5.47341e-174|tcc:ThcaC_p028|rbcL; ribulose 1,5-bisphosphate carboxylase/oxygenase large subunit; K01601 ribulose-bisphosphate carboxylase large chain [EC:4.1.1.39] (A)	--	--	Ribulose bisphosphate carboxylase large chain {ECO:0000255|HAMAP-Rule:MF_01338} (Precursor) OS=Gossypium hirsutum (Upland cotton) PE=3 SV=2	ribulose 1,5-bisphosphate carboxylase/oxygenase large subunit [Theobroma cacao]	Glyoxylate and dicarboxylate metabolism (ko00630);; Carbon fixation in photosynthetic organisms (ko00710);; Carbon metabolism (ko01200)
Gorai.001G206700	87.7891	185.568	219.522	46.2568	36.4253	42.4488	55.0384	6.79341	32.7736	35.3372	8.79543e-05	-2.00003	down	1.09688e-11	-2.55886	down	0.779696	-0.672483	normal	1.64868e-13	2.35895	up	[G]	Carbohydrate transport and metabolism	Biological Process: developmental process involved in reproduction (GO:0003006);; Molecular Function: binding (GO:0005488);; Cellular Component: cell wall (GO:0005618);; Biological Process: post-embryonic development (GO:0009791);; Biological Process: tissue development (GO:0009888);; Biological Process: xylem and phloem pattern formation (GO:0010051);; Biological Process: single-organism cellula…	--	--	--	Vegetative cell wall protein gp1 (Precursor) GN=GP1 OS=Chlamydomonas reinhardtii (Chlamydomonas smithii) PE=1 SV=1	Major pollen allergen Lig v 1 [Gossypium arboreum]	--
Gorai.001G206900	32.0863	28.721	55.0219	30.8602	3.34463	11.1396	4.56715	0.266028	5.62621	7.07113	0.926489	0.097735	normal	0	-3.93911	down	0.859433	0.345053	normal	2.48801e-13	4.24272	up	--	--	--	--	--	--	Major pollen allergen Lig v 1 OS=Ligustrum vulgare (Common privet) PE=1 SV=2	Major pollen allergen Lig v 1 [Gossypium arboreum]	--
Gorai.001G207900	3.60509	6.91784	1.02687	0.213551	1.09929	22.5596	18.0088	3.79537	0.413123	1.09086	1.05471e-14	-4.61146	down	0.930318	0.062878	normal	0	-5.17602	down	0.000140217	-1.75691	down	[RTKL]	--	Biological Process: transition metal ion transport (GO:0000041);; Molecular Function: protein kinase activity (GO:0004672);; Biological Process: glycolytic process (GO:0006096);; Biological Process: water transport (GO:0006833);; Biological Process: hyperosmotic response (GO:0006972);; Biological Process: Golgi organization (GO:0007030);; Biological Process: chromosome segregation (GO:0007059);; …	--	[T]	Signal transduction mechanisms	Receptor-like protein kinase FERONIA (Precursor) GN=F26O13.190 OS=Arabidopsis thaliana (Mouse-ear cress) PE=1 SV=1	Malectin/receptor-like protein kinase family protein, putative [Theobroma cacao]	--
Gorai.001G208800	8.54782	0.889669	3.65686	9.97686	23.4298	30.2965	9.594	37.1161	18.8851	36.686	1.82701e-05	3.08036	up	1.75497e-07	2.56084	up	0.365951	0.956509	normal	0.946397	-0.0333508	normal	--	--	--	--	--	--	--	Uncharacterized protein TCM_018909 [Theobroma cacao]	--
Gorai.001G209000	24.1163	192.998	25.2996	6.07438	10.0722	0.48684	0.828361	0.636761	2.08641	0.274581	0	-4.96711	down	0.0107429	-1.37293	normal	--	--	--	--	--	--	--	--	--	--	--	--	--	Uncharacterized protein TCM_018856 [Theobroma cacao]	--
Gorai.001G209100	5.45608	11.9165	9.74931	1.83053	3.28492	0.0876837	0.111598	0	0.155247	0.146612	1.60812e-06	-2.65059	down	0.00537812	-1.53863	down	--	--	--	--	--	--	--	--	--	--	--	--	--	Uncharacterized protein TCM_018893 [Theobroma cacao]	--
Gorai.001G209200	0.000203946	6.50707e-05	4.34241e-05	0.000711149	0.881707	2.04994e-05	2.80731e-05	0.000937608	1.57855e-05	6.14891e-05	--	--	--	2.64685e-05	3.99157	up	--	--	--	--	--	--	[RTKL]	--	Biological Process: transition metal ion transport (GO:0000041);; Molecular Function: protein kinase activity (GO:0004672);; Biological Process: glycolytic process (GO:0006096);; Biological Process: water transport (GO:0006833);; Biological Process: hyperosmotic response (GO:0006972);; Biological Process: Golgi organization (GO:0007030);; Biological Process: meiotic nuclear division (GO:0007126);…	--	[T]	Signal transduction mechanisms	Receptor-like protein kinase FERONIA (Precursor) GN=F26O13.190 OS=Arabidopsis thaliana (Mouse-ear cress) PE=1 SV=1	Malectin/receptor-like protein kinase family protein, putative [Theobroma cacao]	--
Gorai.001G211700	3.91898	11.1452	7.65153	2.83174	3.70982	2.53754	1.99662	2.57072	3.40718	2.41232	0.00128609	-1.99375	down	0.236395	-1.09147	normal	0.722947	0.839909	normal	0.954117	-0.141576	normal	--	--	Biological Process: metabolic process (GO:0008152);; Cellular Component: membrane (GO:0016020);; Cellular Component: integral component of membrane (GO:0016021);; Cellular Component: intracellular membrane-bounded organelle (GO:0043231);; Cellular Component: cytoplasmic part (GO:0044444);; Biological Process: single-organism cellular process (GO:0044763);; Biological Process: regulation of biolog…	--	[T]	Signal transduction mechanisms	Cytochrome b561 domain-containing protein At2g30890 (Precursor) GN=At2g30890 OS=Arabidopsis thaliana (Mouse-ear cress) PE=2 SV=1	Cytochrome b561/ferric reductase transmembrane family protein, putative [Theobroma cacao]	--
Gorai.001G213000	17.5071	15.3838	15.167	96.4316	21.4243	27.095	7.34817	22.7236	28.5457	21.2477	4.48896e-08	2.6467	up	0.820382	0.469755	normal	0.000152969	2.01414	up	0.933994	-0.108682	normal	--	--	Molecular Function: electron carrier activity (GO:0009055);; Cellular Component: membrane (GO:0016020);; Biological Process: photosynthesis, light reaction (GO:0019684);; Biological Process: electron transport chain (GO:0022900);; Biological Process: cellular metabolic process (GO:0044237);; Cellular Component: intracellular part (GO:0044424);;	K02703|9.25187e-107|rcu:RCOM_0568500|Photosystem Q(B) protein, putative; K02703 photosystem II P680 reaction center D1 protein (A)	--	--	Photosystem II protein D1 {ECO:0000255|HAMAP-Rule:MF_01379} (Precursor) OS=Nicotiana tabacum (Common tobacco) PE=3 SV=2	Photosystem Q(B) protein, putative [Ricinus communis]	Photosynthesis (ko00195)
Gorai.001G214000	4.19412	7.69471	2.57004	10.6993	10.6136	4.19556	12.2266	4.51513	11.0906	7.30098	0.860886	0.376365	normal	2.48706e-05	1.90601	up	0.908531	-0.19429	normal	0.632828	0.640681	normal	--	--	Cellular Component: cytosol (GO:0005829);; Biological Process: response to water deprivation (GO:0009414);; Biological Process: response to wounding (GO:0009611);; Biological Process: response to ethylene (GO:0009723);; Biological Process: abscisic acid-activated signaling pathway (GO:0009738);; Molecular Function: abscisic acid glucosyltransferase activity (GO:0010294);; Cellular Component: memb…	--	[GC]	--	UDP-glucose flavonoid 3-O-glucosyltransferase 6 {ECO:0000303|PubMed:18487633} OS=Fragaria ananassa (Strawberry) PE=1 SV=1	UDP-Glycosyltransferase superfamily protein, putative [Theobroma cacao]	--
Gorai.001G214300	18.6138	22.9655	6.04944	30.3481	25.7671	17.6158	38.9975	14.7929	12.355	8.52063	0.92844	0.340396	normal	6.66673e-07	2.00547	up	0.000653364	-1.6772	down	0.206157	-0.815914	normal	--	--	Cellular Component: cytosol (GO:0005829);; Biological Process: xenobiotic metabolic process (GO:0006805);; Biological Process: ion transport (GO:0006811);; Biological Process: response to water deprivation (GO:0009414);; Biological Process: response to wounding (GO:0009611);; Biological Process: response to ethylene (GO:0009723);; Biological Process: abscisic acid-activated signaling pathway (GO:…	--	[GC]	--	UDP-glucose flavonoid 3-O-glucosyltransferase 6 {ECO:0000303|PubMed:18487633} OS=Fragaria ananassa (Strawberry) PE=1 SV=1	UDP-Glycosyltransferase superfamily protein, putative [Theobroma cacao]	--
Gorai.001G216300	3.00204	35.8641	23.9856	16.4615	9.42867	12.5347	23.1414	34.4677	37.385	23.3349	0.202425	-1.10382	normal	0.00486139	-1.37974	down	0.634684	0.749969	normal	0.694316	-0.582685	normal	[R]	General function prediction only	--	--	--	--	--	Amidophosphoribosyltransferase [Gossypium arboreum]	--
Gorai.001G216900	23.7283	72.4949	30.1334	9.87428	7.61893	29.4493	103.861	21.3013	24.9675	27.1209	7.03031e-11	-3.01793	down	1.49461e-07	-2.07854	down	2.66557e-06	-2.11854	down	0.950583	0.272693	normal	--	--	Cellular Component: endoplasmic reticulum (GO:0005783);; Biological Process: carbohydrate metabolic process (GO:0005975);; Biological Process: chromatin silencing (GO:0006342);; Biological Process: cell communication (GO:0007154);; Cellular Component: plant-type cell wall (GO:0009505);; Cellular Component: plasmodesma (GO:0009506);; Biological Process: embryo development ending in seed dormancy (…	--	--	--	Glucan endo-1,3-beta-glucosidase 13 (Precursor) GN=At5g56590 OS=Arabidopsis thaliana (Mouse-ear cress) PE=1 SV=1	hypothetical protein F383_30989 [Gossypium arboreum]	--
Gorai.001G217400	5.41187	5.11018	1.39155	0.754346	1.25387	0.710424	9.32946	0.110718	1.99636	0.708039	1.14999e-05	-2.63464	down	0.933035	-0.174775	normal	1.80164e-05	-2.1751	down	--	--	--	[R]	General function prediction only	Molecular Function: iron ion binding (GO:0005506);; Cellular Component: cytoplasm (GO:0005737);; Biological Process: defense response (GO:0006952);; Biological Process: ethylene biosynthetic process (GO:0009693);; Molecular Function: 1-aminocyclopropane-1-carboxylate oxidase activity (GO:0009815);; Biological Process: fruit ripening (GO:0009835);; Molecular Function: oxidoreductase activity, acti…	K05933|0|tcc:TCM_002179|Ethylene-forming enzyme; K05933 aminocyclopropanecarboxylate oxidase [EC:1.14.17.4] (A)	[QR]	--	1-aminocyclopropane-1-carboxylate oxidase 3 GN=ACO3 OS=Petunia hybrida (Petunia) PE=3 SV=1	Ethylene-forming enzyme [Theobroma cacao]	Cysteine and methionine metabolism (ko00270)
Gorai.001G218000	28.7005	39.923	86.4733	34.9547	30.0581	24.9643	9.75201	13.4167	30.1868	33.6339	0.954215	-0.0658316	normal	0.00207561	-1.43094	down	0.000203099	1.77108	up	7.99019e-05	1.36942	up	--	--	Molecular Function: carboxylic ester hydrolase activity (GO:0004091);; Biological Process: lipid metabolic process (GO:0006629);; Biological Process: root morphogenesis (GO:0010015);; Biological Process: regulation of hormone levels (GO:0010817);; Biological Process: cell growth (GO:0016049);; Molecular Function: hydrolase activity, acting on ester bonds (GO:0016788);; Biological Process: cellula…	--	--	--	GDSL esterase/lipase At2g42990 (Precursor) GN=At2g42990 OS=Arabidopsis thaliana (Mouse-ear cress) PE=2 SV=1	hypothetical protein F383_19515 [Gossypium arboreum]	--
Gorai.001G218100	0.877687	2.99066	4.76317	3.38375	1.57511	1.95855	1.65492	3.661	5.55715	4.88359	0.881808	0.138852	normal	0.00378107	-1.54613	down	0.00119462	1.76171	up	0.913541	0.261529	normal	[M]	Cell wall/membrane/envelope biogenesis	Cellular Component: mitochondrion (GO:0005739);; Molecular Function: lipid-A-disaccharide synthase activity (GO:0008915);; Biological Process: lipid A biosynthetic process (GO:0009245);; Cellular Component: chloroplast (GO:0009507);; Molecular Function: transferase activity, transferring glycosyl groups (GO:0016757);; Biological Process: methylglyoxal catabolic process to D-lactate (GO:0019243);;…	K00748|0|tcc:TCM_002215|Lipid-A-disaccharide synthase isoform 1; K00748 lipid-A-disaccharide synthase [EC:2.4.1.182] (A)	--	--	Probable lipid-A-disaccharide synthase, mitochondrial (Precursor) GN=LPXB OS=Arabidopsis thaliana (Mouse-ear cress) PE=2 SV=1	Lipid-A-disaccharide synthase [Gossypium arboreum]	--
Gorai.001G218500	9.13845	55.32	9.36179	17.1415	12.8039	37.5414	78.2489	66.1224	22.7666	25.1523	0.000506967	-1.81624	down	0.914204	0.146804	normal	9.16933e-06	-2.01893	down	6.68601e-06	-1.48249	down	--	--	Biological Process: alternative mRNA splicing, via spliceosome (GO:0000380);; Molecular Function: RNA binding (GO:0003723);; Molecular Function: protein kinase activity (GO:0004672);; Molecular Function: copper ion binding (GO:0005507);; Molecular Function: ATP binding (GO:0005524);; Cellular Component: cell wall (GO:0005618);; Cellular Component: nucleolus (GO:0005730);; Cellular Component: mito…	--	--	--	Glycine-rich cell wall structural protein (Precursor) GN=GRP OS=Hordeum vulgare (Barley) PE=2 SV=1	Glycine-rich [Gossypium arboreum]	--
Gorai.001G219300	19.0592	28.4246	16.0051	8.2327	6.68913	10.8597	20.4426	14.1258	9.26933	6.69497	0.00621191	-1.58985	down	0.0193354	-1.30888	normal	0.111435	-1.14714	normal	0.046656	-1.07343	normal	--	--	Biological Process: leaf morphogenesis (GO:0009965);; Biological Process: cell differentiation (GO:0030154);; Biological Process: positive regulation of transcription, DNA-templated (GO:0045893);;	--	--	--	--	PTB domain-containing engulfment adapter protein 1 isoform 1 [Theobroma cacao]	--
Gorai.001G220900	76.8629	6.33742	74.1662	48.4412	42.0835	2.46393	0.442105	0.342027	0.389732	1.35152	2.01009e-09	2.83288	up	0.317468	-0.925149	normal	--	--	--	0.468246	1.72621	normal	--	--	Cellular Component: plasma membrane (GO:0005886);; Cellular Component: photosystem I (GO:0009522);; Cellular Component: photosystem II (GO:0009523);; Cellular Component: chloroplast thylakoid membrane (GO:0009535);; Biological Process: response to blue light (GO:0009637);; Biological Process: photosynthesis, light harvesting (GO:0009765);; Cellular Component: chloroplast envelope (GO:0009941);; B…	K08913|0|tcc:TCM_002333|Photosystem II light harvesting complex gene 2.1; K08913 light-harvesting complex II chlorophyll a/b binding protein 2 (A)	--	--	Chlorophyll a-b binding protein 151, chloroplastic (Precursor) GN=CAB-151 OS=Gossypium hirsutum (Upland cotton) PE=2 SV=2	RecName: Full=Chlorophyll a-b binding protein 151, chloroplastic; AltName: Full=LHCII type II CAB-151; Short=LHCP; Flags: Precursor [Gossypium hirsutum]	Photosynthesis - antenna proteins (ko00196)
Gorai.001G221900	5.6405	4.7578	2.94547	0	1.57211	1.39069	9.01082	0.200517	0.731603	0	0.000892714	-3.58079	down	0.918236	-0.857185	normal	9.26313e-05	-2.97246	down	--	--	--	--	--	Molecular Function: protein binding (GO:0005515);; Biological Process: response to carbohydrate (GO:0009743);; Biological Process: cellular response to nitrogen levels (GO:0043562);;	K07199|3.62389e-59|tcc:TCM_002404|5'-AMP-activated protein kinase beta-2 subunit protein, putative isoform 1; K07199 5'-AMP-activated protein kinase, regulatory beta subunit (A)	[G]	Carbohydrate transport and metabolism	SNF1-related protein kinase regulatory subunit beta-2 GN=KINB2 OS=Arabidopsis thaliana (Mouse-ear cress) PE=1 SV=1	SNF1-related protein kinase regulatory subunit beta-2 [Gossypium arboreum]	--
Gorai.001G222000	3.47919	6.06106	3.10018	0.60927	1.43307	0.94574	7.12669	0.830864	0.734627	0.460702	0.000280508	-2.80306	down	0.799065	-1.0119	normal	6.60611e-05	-2.80994	down	--	--	--	--	--	--	K07199|5.90353e-61|tcc:TCM_002404|5'-AMP-activated protein kinase beta-2 subunit protein, putative isoform 1; K07199 5'-AMP-activated protein kinase, regulatory beta subunit (A)	[G]	Carbohydrate transport and metabolism	SNF1-related protein kinase regulatory subunit beta-2 GN=KINB2 OS=Arabidopsis thaliana (Mouse-ear cress) PE=1 SV=1	SNF1-related protein kinase regulatory subunit beta-2 [Gossypium arboreum]	--
Gorai.001G222300	68.4018	38.5412	49.8015	15.2103	13.8896	70.0901	24.5163	49.5109	19.9819	27.9634	0.0283253	-1.40575	normal	1.11791e-07	-2.07477	down	0.918002	-0.355341	normal	0.19219	-0.838836	normal	[B]	Chromatin structure and dynamics	Molecular Function: DNA binding (GO:0003677);; Molecular Function: sequence-specific DNA binding transcription factor activity (GO:0003700);; Molecular Function: protein binding (GO:0005515);; Cellular Component: intracellular (GO:0005622);; Cellular Component: nucleus (GO:0005634);; Biological Process: regulation of transcription, DNA-templated (GO:0006355);; Biological Process: response to stre…	--	[K]	Transcription	Nuclear transcription factor Y subunit B-3 OS=Arabidopsis thaliana (Mouse-ear cress) PE=2 SV=1	Nuclear transcription factor Y subunit B-3 [Theobroma cacao]	--
Gorai.001G222400	40.2132	130.667	73.9632	26.5919	43.9645	156.162	169.949	107.414	70.3401	62.4855	1.46506e-06	-2.32044	down	0.656932	-0.772882	normal	0.146629	-1.20555	normal	0.369739	-0.794047	normal	--	--	Cellular Component: vacuolar membrane (GO:0005774);; Biological Process: acetyl-CoA metabolic process (GO:0006084);; Biological Process: calcium ion transport (GO:0006816);; Biological Process: Golgi organization (GO:0007030);; Biological Process: pattern specification process (GO:0007389);; Biological Process: regulation of cell size (GO:0008361);; Cellular Component: plant-type cell wall (GO:00…	--	--	--	Fasciclin-like arabinogalactan protein 2 (Precursor) GN=FLA2 OS=Arabidopsis thaliana (Mouse-ear cress) PE=1 SV=1	fasciclin-like arabinogalactan protein 19 [Gossypium hirsutum]	--
Gorai.001G222500	1.00703	0.881948	0.711389	3.76254	2.73886	0.414439	6.59462	4.7357	0.214907	0.452781	0.00405336	2.00758	up	0.0215083	1.78437	normal	3.91931e-12	-4.29288	down	5.46486e-10	-3.22411	down	[LR]	--	Biological Process: MAPK cascade (GO:0000165);; Molecular Function: NAD+ diphosphatase activity (GO:0000210);; Biological Process: respiratory burst involved in defense response (GO:0002679);; Molecular Function: protein binding (GO:0005515);; Cellular Component: nucleus (GO:0005634);; Cellular Component: cytosol (GO:0005829);; Cellular Component: plasma membrane (GO:0005886);; Biological Process…	--	[T]	Signal transduction mechanisms	Nudix hydrolase 10 GN=T30C3.4 OS=Arabidopsis thaliana (Mouse-ear cress) PE=1 SV=1	Nudix hydrolase isoform 1 [Theobroma cacao]	--
Gorai.001G223100	29.0727	52.9546	48.768	41.2239	17.9224	28.9259	28.069	34.5733	37.4998	29.8735	0.934318	-0.334031	normal	0.00159769	-1.43901	down	0.868612	0.508232	normal	0.954952	-0.21442	normal	--	--	--	--	--	--	--	hypothetical protein F383_05729 [Gossypium arboreum]	--
Gorai.001G223400	0.761712	1.45706	0.612803	2.08783	2.83665	0.473158	3.22756	4.87194	0.613279	2.06066	0.827414	0.482176	normal	0.000289808	2.13403	up	0.00049779	-2.14646	down	0.0124685	-1.24606	normal	[S]	Function unknown	Molecular Function: catalytic activity (GO:0003824);; Molecular Function: protein binding (GO:0005515);; Biological Process: transport (GO:0006810);; Biological Process: defense response (GO:0006952);; Biological Process: immune response (GO:0006955);; Biological Process: epidermis development (GO:0008544);; Biological Process: response to bacterium (GO:0009617);; Biological Process: anatomical s…	--	[R]	General function prediction only	Receptor-like protein 12 (Precursor) GN=RLP12 OS=Arabidopsis thaliana (Mouse-ear cress) PE=2 SV=2	PREDICTED: receptor-like protein 12 [Vitis vinifera]	--
Gorai.001G223700	39.3911	27.05	95.393	50.6073	26.4958	61.6199	23.4233	114.764	101.372	81.2239	0.480145	0.92376	normal	1.55474e-05	-1.77126	down	4.84352e-07	2.21472	up	0.763675	-0.613055	normal	--	--	Molecular Function: ubiquitin-protein transferase activity (GO:0004842);; Molecular Function: protein binding (GO:0005515);; Molecular Function: zinc ion binding (GO:0008270);; Biological Process: response to salt stress (GO:0009651);; Biological Process: abscisic acid metabolic process (GO:0009687);; Biological Process: ethylene biosynthetic process (GO:0009693);; Biological Process: response to…	K16285|6.19856e-76|tcc:TCM_002456|RING/U-box superfamily protein, putative; K16285 RING/U-box domain-containing protein (A)	[O]	Posttranslational modification, protein turnover, chaperones	Probable E3 ubiquitin-protein ligase XERICO GN=XERICO OS=Arabidopsis thaliana (Mouse-ear cress) PE=1 SV=1	putative E3 ubiquitin-protein ligase RHA2B -like protein [Gossypium arboreum]	--
Gorai.001G224100	0.81647	0.626043	1.22563	0.733821	0.235312	0.370453	0.504247	0.16512	0.0931504	0.314574	0.914189	0.241391	normal	0.00606918	-2.22029	down	0.632495	-1.73888	normal	--	--	--	--	--	Biological Process: vegetative to reproductive phase transition of meristem (GO:0010228);;	--	--	--	Uncharacterized membrane protein At3g27390 GN=At3g27390 OS=Arabidopsis thaliana (Mouse-ear cress) PE=1 SV=2	Uncharacterized protein isoform 1 [Theobroma cacao]	--
Gorai.001G224300	8.3204	6.11182	6.66637	2.40772	2.39224	5.57254	5.00651	4.43522	5.11017	4.26673	0.0455775	-1.34241	normal	0.00167102	-1.49751	down	0.910934	0.0521627	normal	0.940576	-0.0723999	normal	[O]	Posttranslational modification, protein turnover, chaperones	Molecular Function: serine-type endopeptidase activity (GO:0004252);; Biological Process: proteolysis (GO:0006508);; Cellular Component: plant-type cell wall (GO:0009505);; Biological Process: response to auxin (GO:0009733);; Cellular Component: external side of plasma membrane (GO:0009897);; Biological Process: lateral root morphogenesis (GO:0010102);; Biological Process: stomatal complex morpho…	--	--	--	Subtilisin-like protease SBT5.3 (Precursor) OS=Arabidopsis thaliana (Mouse-ear cress) PE=2 SV=1	Subtilisin-like serine endopeptidase family protein isoform 1 [Theobroma cacao]	--
Gorai.001G226700	25.0044	15.4369	8.77852	30.8436	28.7183	15.9085	25.4409	21.6447	11.3361	12.2386	0.353862	1.02715	normal	6.49524e-05	1.68443	up	0.184484	-1.07333	normal	0.17337	-0.832953	normal	[RTKL]	--	Molecular Function: protein kinase activity (GO:0004672);; Molecular Function: protein serine/threonine kinase activity (GO:0004674);; Molecular Function: steroid binding (GO:0005496);; Molecular Function: ATP binding (GO:0005524);; Cellular Component: nucleus (GO:0005634);; Cellular Component: endosome (GO:0005768);; Cellular Component: plasma membrane (GO:0005886);; Biological Process: polysacc…	--	--	--	Probably inactive leucine-rich repeat receptor-like protein kinase At5g48380 (Precursor) GN=At5g48380 OS=Arabidopsis thaliana (Mouse-ear cress) PE=1 SV=1	Probably inactive leucine-rich repeat receptor-like protein kinase [Theobroma cacao]	--
Gorai.001G229800	19.366	15.2395	27.6707	6.94399	4.8485	39.3823	17.4565	18.1739	8.90224	12.9995	0.119758	-1.18975	normal	6.02599e-11	-2.54652	down	0.296082	-0.973089	normal	0.82023	-0.493275	normal	--	--	Cellular Component: ubiquitin ligase complex (GO:0000151);; Molecular Function: ubiquitin-protein transferase activity (GO:0004842);; Cellular Component: nucleus (GO:0005634);; Cellular Component: cytosol (GO:0005829);; Cellular Component: plasma membrane (GO:0005886);; Biological Process: signal transduction (GO:0007165);; Biological Process: protein localization (GO:0008104);; Biological Proces…	--	[S]	Function unknown	U-box domain-containing protein 9 GN=PUB9 OS=Arabidopsis thaliana (Mouse-ear cress) PE=1 SV=1	U-box domain-containing 9 -like protein [Gossypium arboreum]	--
Gorai.001G230000	2.14253	5.03901	3.71381	1.18695	2.60941	3.86928	5.7996	11.7703	7.57867	14.9186	0.00307452	-1.94879	down	0.86399	-0.422895	normal	0.793714	0.504171	normal	0.894176	0.34677	normal	--	--	Molecular Function: DNA binding (GO:0003677);; Molecular Function: sequence-specific DNA binding transcription factor activity (GO:0003700);; Cellular Component: nucleus (GO:0005634);; Biological Process: regulation of transcription, DNA-templated (GO:0006355);; Biological Process: gibberellic acid mediated signaling pathway (GO:0009740);; Biological Process: positive regulation of flower develop…	--	--	--	Transcription factor bHLH62 GN=F21O3.5 OS=Arabidopsis thaliana (Mouse-ear cress) PE=2 SV=1	Basic helix-loop-helix DNA-binding superfamily protein, putative [Theobroma cacao]	--
Gorai.001G230200	2.50007	5.06198	2.14312	0.818758	1.74688	1.19157	4.09314	0.42916	1.69982	1.09544	2.45361e-05	-2.51698	down	0.892661	-0.359958	normal	0.140572	-1.2457	normal	0.827483	1.12658	normal	--	--	Molecular Function: hydrolase activity, hydrolyzing O-glycosyl compounds (GO:0004553);; Cellular Component: endoplasmic reticulum (GO:0005783);; Biological Process: carbohydrate metabolic process (GO:0005975);; Biological Process: chromatin silencing (GO:0006342);; Biological Process: cell communication (GO:0007154);; Cellular Component: plant-type cell wall (GO:0009505);; Cellular Component: pla…	--	--	--	Probable glucan endo-1,3-beta-glucosidase A6 (Precursor) GN=A6 OS=Arabidopsis thaliana (Mouse-ear cress) PE=2 SV=1	putative glucan endo-1,3-beta-glucosidase A6 -like protein [Gossypium arboreum]	--
Gorai.001G230400	0.59463	0.287438	0.265995	4.50309	3.42366	2.29792	2.69241	4.53185	4.87777	6.60202	2.62804e-07	3.46365	up	4.18077e-07	3.37499	up	0.655032	0.742595	normal	0.81824	0.507085	normal	[CR]	--	Molecular Function: NADPH:quinone reductase activity (GO:0003960);; Cellular Component: vacuole (GO:0005773);; Cellular Component: Golgi apparatus (GO:0005794);; Cellular Component: cytosol (GO:0005829);; Cellular Component: plasma membrane (GO:0005886);; Molecular Function: zinc ion binding (GO:0008270);; Cellular Component: plastid inner membrane (GO:0009528);; Cellular Component: chloroplast t…	--	[CR]	--	Putative quinone-oxidoreductase homolog, chloroplastic GN=At4g13010 OS=Arabidopsis thaliana (Mouse-ear cress) PE=2 SV=1	hypothetical protein F383_19738 [Gossypium arboreum]	--
Gorai.001G230500	7.56737	0.627672	2.0091	11.5367	21.4867	6.38557	2.05305	3.38932	4.6387	7.21991	1.44229e-12	3.93252	up	8.10463e-15	3.28018	up	0.206327	1.15487	normal	0.0815869	1.04682	normal	[CR]	--	Cellular Component: vacuole (GO:0005773);; Cellular Component: Golgi apparatus (GO:0005794);; Cellular Component: cytosol (GO:0005829);; Cellular Component: plasma membrane (GO:0005886);; Molecular Function: zinc ion binding (GO:0008270);; Cellular Component: chloroplast thylakoid membrane (GO:0009535);; Cellular Component: chloroplast inner membrane (GO:0009706);; Molecular Function: oxidoreduct…	--	[CR]	--	Putative quinone-oxidoreductase homolog, chloroplastic GN=At4g13010 OS=Arabidopsis thaliana (Mouse-ear cress) PE=2 SV=1	Quinone-oxidoreductase, chloroplastic [Gossypium arboreum]	--
Gorai.001G230800	119.962	69.4713	51.2976	200.748	176.225	112.456	100.473	103.288	178.301	135.854	0.0277585	1.48061	normal	5.44418e-05	1.70999	up	0.761848	0.843087	normal	0.972644	0.351026	normal	[CR]	--	Cellular Component: vacuole (GO:0005773);; Cellular Component: Golgi apparatus (GO:0005794);; Cellular Component: cytosol (GO:0005829);; Cellular Component: plasma membrane (GO:0005886);; Molecular Function: zinc ion binding (GO:0008270);; Cellular Component: chloroplast thylakoid membrane (GO:0009535);; Cellular Component: chloroplast inner membrane (GO:0009706);; Molecular Function: oxidoreduct…	--	[CR]	--	Putative quinone-oxidoreductase homolog, chloroplastic GN=At4g13010 OS=Arabidopsis thaliana (Mouse-ear cress) PE=2 SV=1	hypothetical protein F383_34925 [Gossypium arboreum]	--
Gorai.001G231200	5.38333	0.029148	0.58199	1.34634	1.04735	7.04907	0.112838	0	0.132735	0.061675	5.95301e-06	4.12288	up	0.840917	0.736262	normal	--	--	--	--	--	--	--	--	Molecular Function: protein binding (GO:0005515);; Cellular Component: nucleus (GO:0005634);; Biological Process: response to salt stress (GO:0009651);; Biological Process: abscisic acid-activated signaling pathway (GO:0009738);; Biological Process: jasmonic acid mediated signaling pathway (GO:0009867);; Biological Process: negative regulation of transcription, DNA-templated (GO:0045892);; Biolog…	--	--	--	Ninja-family protein AFP3 GN=AFP3 OS=Arabidopsis thaliana (Mouse-ear cress) PE=1 SV=1	Ninja-family protein AFP3 [Gossypium arboreum]	--
Gorai.001G234300	6.61286	1.87648	6.05838	29.1061	10.1396	9.94613	2.1707	7.42807	15.4639	9.26551	3.78632e-11	3.71171	up	0.763626	0.646605	normal	1.93652e-06	2.74776	up	0.925953	0.279457	normal	--	--	Molecular Function: electron carrier activity (GO:0009055);; Cellular Component: chloroplast (GO:0009507);; Cellular Component: plastid (GO:0009536);; Biological Process: photosynthesis, light reaction (GO:0019684);; Biological Process: electron transport chain (GO:0022900);; Cellular Component: photosynthetic membrane (GO:0034357);; Cellular Component: protein complex (GO:0043234);; Cellular Com…	K02706|5.9644e-145|tcc:ThcaC_p016|psbD; photosystem II protein D2; K02706 photosystem II P680 reaction center D2 protein (A)	--	--	Photosystem II D2 protein {ECO:0000255|HAMAP-Rule:MF_01383} OS=Ranunculus macranthus (Large buttercup) PE=3 SV=1	photosystem II D2 protein, partial (chloroplast) [Campynema lineare]	Photosynthesis (ko00195)
Gorai.001G235000	2.27902	5.30592	4.04256	0.684975	0.196855	1.62113	3.38545	2.47255	0.920847	0.425958	8.09124e-05	-2.77878	down	3.38191e-06	-3.54087	down	0.307616	-1.41243	normal	0.0202309	-2.35126	normal	--	--	--	--	--	--	--	Krueppel-like factor 17 [Gossypium arboreum]	--
Gorai.001G236000	2.07869	0.44034	0.255875	4.5219	3.27476	0.540111	0.467636	2.89651	0.353028	0.925459	1.20633e-07	3.15279	up	3.14753e-08	3.33907	up	--	--	--	0.00613833	-1.59734	down	--	--	Cellular Component: cytosol (GO:0005829);; Biological Process: cellular amino acid metabolic process (GO:0006520);; Biological Process: response to water deprivation (GO:0009414);; Cellular Component: chloroplast (GO:0009507);; Biological Process: response to hormone (GO:0009725);; Biological Process: response to salicylic acid (GO:0009751);; Biological Process: post-embryonic development (GO:000…	K00799|3.61751e-70|tcc:TCM_003775|Glutathione S-transferase tau 7-like protein; K00799 glutathione S-transferase [EC:2.5.1.18] (A)	[O]	Posttranslational modification, protein turnover, chaperones	Glutathione transferase GST 23 OS=Zea mays (Maize) PE=2 SV=1	Glutathione S-transferase tau 7-like protein [Theobroma cacao]	Glutathione metabolism (ko00480)
Gorai.001G236600	5.32828	4.08856	2.802	15.9986	6.23699	1.26255	2.96812	5.23564	0	0.759679	0.00144033	1.93087	up	0.473639	1.09476	normal	0.00662024	-3.33365	down	0.000661281	-2.57723	down	--	--	--	--	--	--	--	Uncharacterized protein TCM_010649 [Theobroma cacao]	--
Gorai.001G236700	2.50671	1.07272	0.897511	6.694	4.47126	0.745943	1.41437	2.63407	0	0.480017	0.00701354	2.34184	up	0.108218	1.99991	normal	--	--	--	0.508654	-2.12593	normal	--	--	--	--	--	--	--	Uncharacterized protein TCM_010649 [Theobroma cacao]	--
Gorai.001G237800	76.4706	14.028	34.6436	54.4522	48.6377	44.8077	24.6884	5.35349	12.551	11.6078	0.000246447	1.88858	up	0.947378	0.385036	normal	0.348285	-0.965578	normal	0.01022	1.09622	normal	--	--	Biological Process: defense response to insect (GO:0002213);; Molecular Function: chitinase activity (GO:0004568);; Molecular Function: protein binding (GO:0005515);; Cellular Component: extracellular region (GO:0005576);; Biological Process: chitin catabolic process (GO:0006032);; Cellular Component: plant-type cell wall (GO:0009505);; Cellular Component: plasmodesma (GO:0009506);; Cellular Comp…	--	--	--	Leucine-rich repeat extensin-like protein 6 (Precursor) GN=LRX6 OS=Arabidopsis thaliana (Mouse-ear cress) PE=2 SV=1	Beta-lactamase hcpB [Gossypium arboreum]	--
Gorai.001G239000	0.0776352	1.26627	1.5707	0.297877	0.0559331	1.2138	0.834369	0.635423	0.891126	1.12343	0.156587	-2.15435	normal	0.0010887	-3.58938	down	0.954826	-0.149086	normal	0.955734	0.709312	normal	[KAD]	--	Biological Process: tryptophan biosynthetic process (GO:0000162);; Biological Process: MAPK cascade (GO:0000165);; Biological Process: defense response to insect (GO:0002213);; Molecular Function: DNA binding (GO:0003677);; Molecular Function: chromatin binding (GO:0003682);; Molecular Function: sequence-specific DNA binding transcription factor activity (GO:0003700);; Molecular Function: protein…	K09422|2.89393e-137|tcc:TCM_018538|Myb domain protein 30, putative; K09422 myb proto-oncogene protein, plant (A)	[K]	Transcription	Myb-related protein 306 OS=Antirrhinum majus (Garden snapdragon) PE=2 SV=1	myb transcription factor MYB30 [Gossypium hirsutum]	--
Gorai.001G239200	2.47739	6.07336	3.8168	0.586833	0.791798	1.42268	5.54705	3.42603	1.94104	1.32701	1.91531e-10	-3.28206	down	9.38638e-07	-2.25742	down	0.0083643	-1.47258	down	0.00202964	-1.3673	down	[G]	Carbohydrate transport and metabolism	Biological Process: response to hypoxia (GO:0001666);; Molecular Function: protein binding (GO:0005515);; Cellular Component: vacuolar membrane (GO:0005774);; Cellular Component: Golgi apparatus (GO:0005794);; Cellular Component: plasma membrane (GO:0005886);; Molecular Function: starch synthase activity (GO:0009011);; Biological Process: glucan biosynthetic process (GO:0009250);; Cellular Compon…	K00703|0|tcc:TCM_018569|Starch synthase 2; K00703 starch synthase [EC:2.4.1.21] (A)	--	--	Granule-bound starch synthase 2, chloroplastic/amyloplastic (Precursor) GN=SS2 OS=Solanum tuberosum (Potato) PE=1 SV=3	Granule-bound starch synthase 2, chloroplastic/amyloplastic [Gossypium arboreum]	Starch and sucrose metabolism (ko00500)
Gorai.001G241900	6.15993	4.14884	4.20235	0.923311	3.10554	6.52772	6.13954	2.30873	2.32681	3.43985	0.000246606	-2.14333	down	0.829171	-0.443347	normal	0.0434284	-1.3034	normal	0.777604	0.564171	normal	--	--	Biological Process: cell growth (GO:0016049);; Biological Process: developmental growth (GO:0048589);; Biological Process: anatomical structure development (GO:0048856);;	--	--	--	Protein LONGIFOLIA 1 GN=T20K14.190 OS=Arabidopsis thaliana (Mouse-ear cress) PE=1 SV=1	Phosphate import ATP-binding PstB [Gossypium arboreum]	--
Gorai.001G242000	85.6732	0.808538	11.3092	53.1631	53.5022	75.5584	0.36715	0.762972	6.97338	17.2975	0	5.65835	up	6.6158e-08	2.1398	up	3.90646e-10	3.75752	up	0	4.3649	up	--	--	Molecular Function: iron ion binding (GO:0005506);; Cellular Component: nucleus (GO:0005634);; Cellular Component: chloroplast (GO:0009507);; Biological Process: secondary shoot formation (GO:0010223);; Molecular Function: cis-trans isomerase activity (GO:0016859);; Biological Process: strigolactone biosynthetic process (GO:1901601);;	K17911|1.36112e-147|tcc:TCM_004236|DWARF27, putative isoform 1; K17911 beta-carotene isomerase [EC:5.2.1.14] (A)	--	--	Beta-carotene isomerase D27, chloroplastic (Precursor) GN=D27 OS=Oryza sativa subsp. japonica (Rice) PE=1 SV=1	DWARF27, putative isoform 1 [Theobroma cacao]	Carotenoid biosynthesis (ko00906)
Gorai.001G243100	0.182311	3.59588	0.697516	0.622302	0.125049	0.142656	1.52617	0.49553	1.27468	0.720605	0.00222199	-2.18722	down	--	--	--	0.895189	-0.354856	normal	--	--	--	--	--	Cellular Component: male germ cell nucleus (GO:0001673);; Molecular Function: ubiquitin-protein transferase activity (GO:0004842);; Molecular Function: protein binding (GO:0005515);; Biological Process: DNA-dependent DNA replication (GO:0006261);; Cellular Component: chloroplast (GO:0009507);; Biological Process: pollen development (GO:0009555);; Biological Process: embryo development (GO:0009790…	--	--	--	F-box/LRR-repeat protein 17 GN=FBL17 OS=Arabidopsis thaliana (Mouse-ear cress) PE=1 SV=1	F-box/LRR-repeat protein 17 [Theobroma cacao]	--
Gorai.001G243700	3.38082	8.18685	5.67895	2.6699	1.21205	1.6482	4.19127	3.60271	3.6818	3.19825	0.00769406	-1.58227	down	4.56564e-07	-2.33253	down	0.862001	-0.31952	normal	0.927136	-0.183449	normal	--	--	Molecular Function: sequence-specific DNA binding transcription factor activity (GO:0003700);; Cellular Component: nucleolus (GO:0005730);; Cellular Component: cytoplasm (GO:0005737);; Biological Process: regulation of transcription, DNA-templated (GO:0006355);; Biological Process: response to ethylene (GO:0009723);; Biological Process: posttranscriptional gene silencing by RNA (GO:0035194);; Mol…	--	--	--	Protein BASIC PENTACYSTEINE4 GN=BPC4 OS=Arabidopsis thaliana (Mouse-ear cress) PE=1 SV=1	basic pentacysteine4 -like protein [Gossypium arboreum]	--
Gorai.001G244000	2.39254	4.08763	4.70736	20.4829	14.6018	13.4286	4.95105	14.478	33.8572	31.8222	1.40212e-06	2.32804	up	0.000619653	1.5334	up	8.39075e-11	2.78347	up	0.00372109	1.12913	up	[F]	Nucleotide transport and metabolism	Molecular Function: amidophosphoribosyltransferase activity (GO:0004044);; Cellular Component: cell wall (GO:0005618);; Cellular Component: cytosol (GO:0005829);; Biological Process: 'de novo' IMP biosynthetic process (GO:0006189);; Biological Process: glutamine metabolic process (GO:0006541);; Biological Process: purine nucleobase biosynthetic process (GO:0009113);; Biological Process: nucleosid…	K00764|0|tcc:TCM_006764|GLN phosphoribosyl pyrophosphate amidotransferase 1; K00764 amidophosphoribosyltransferase [EC:2.4.2.14] (A)	[F]	Nucleotide transport and metabolism	Amidophosphoribosyltransferase 1, chloroplastic (Precursor) GN=F1P15 OS=Arabidopsis thaliana (Mouse-ear cress) PE=2 SV=1	GLN phosphoribosyl pyrophosphate amidotransferase 1 [Theobroma cacao]	Purine metabolism (ko00230);; Alanine, aspartate and glutamate metabolism (ko00250)
Gorai.001G244200	11.7284	46.4816	39.0031	21.8429	11.8558	17.0647	40.9318	48.1134	42.8039	36.8056	0.367573	-1.00426	normal	7.55023e-05	-1.68033	down	0.948004	0.135189	normal	0.864137	-0.476611	normal	[J]	Translation, ribosomal structure and biogenesis	Molecular Function: RNA binding (GO:0003723);; Biological Process: rRNA processing (GO:0006364);; Cellular Component: chloroplast (GO:0009507);; Biological Process: embryo development ending in seed dormancy (GO:0009793);; Biological Process: thylakoid membrane organization (GO:0010027);; Biological Process: vegetative to reproductive phase transition of meristem (GO:0010228);; Biological Process…	K02834|4.67872e-117|tcc:TCM_006760|Ribosome-binding factor A family protein isoform 1; K02834 ribosome-binding factor A (A)	--	--	Probable ribosome-binding factor A, chloroplastic (Precursor) GN=At4g34730 OS=Arabidopsis thaliana (Mouse-ear cress) PE=2 SV=2	Ribosome-binding factor A family protein isoform 1 [Theobroma cacao]	--
Gorai.001G244500	52.7732	57.4182	32.2631	8.47682	10.568	59.1297	58.4139	32.4126	19.7034	33.9637	3.86262e-08	-2.70674	down	0.00133447	-1.55557	down	0.00794754	-1.45048	down	0.94551	0.0664285	normal	--	--	Molecular Function: calmodulin binding (GO:0005516);; Cellular Component: mitochondrion (GO:0005739);; Biological Process: auxin-activated signaling pathway (GO:0009734);;	K14488|3.32775e-69|tcc:TCM_006757|SAUR family protein; K14488 SAUR family protein (A)	--	--	Indole-3-acetic acid-induced protein ARG7 GN=ARG7 OS=Vigna radiata var. radiata (Mung bean) PE=2 SV=1	SAUR family protein [Theobroma cacao]	Plant hormone signal transduction (ko04075)
Gorai.001G246300	9.77214	3.64833	19.1948	6.38821	3.59104	8.64676	1.10892	6.33061	4.71288	15.1042	0.827551	0.804218	normal	0.000174531	-2.2388	down	0.441346	1.77868	normal	0.191479	1.19493	normal	--	--	Biological Process: auxin-activated signaling pathway (GO:0009734);;	K14488|2.20797e-37|tcc:TCM_006743|SAUR-like auxin-responsive protein family; K14488 SAUR family protein (A)	--	--	Auxin-induced protein X10A OS=Glycine max (Soybean) PE=2 SV=1	SAUR-like auxin-responsive protein family [Theobroma cacao]	Plant hormone signal transduction (ko04075)
Gorai.001G247400	21.4548	32.2566	22.8602	8.63364	12.701	15.4428	22.3428	27.7853	13.3376	13.4045	0.000131944	-1.94054	down	0.267427	-0.916516	normal	0.734892	-0.670326	normal	0.00532812	-1.11013	down	[I]	Lipid transport and metabolism	Molecular Function: acyl-CoA dehydrogenase activity (GO:0003995);; Molecular Function: acyl-CoA oxidase activity (GO:0003997);; Cellular Component: mitochondrion (GO:0005739);; Cellular Component: peroxisome (GO:0005777);; Cellular Component: cytosol (GO:0005829);; Biological Process: protein targeting to vacuole (GO:0006623);; Biological Process: fatty acid beta-oxidation (GO:0006635);; Biologic…	K00232|0|tcc:TCM_021674|Acyl-CoA oxidase 4; K00232 acyl-CoA oxidase [EC:1.3.3.6] (A)	[E]	Amino acid transport and metabolism	Acyl-coenzyme A oxidase 4, peroxisomal GN=ACX4 OS=Arabidopsis thaliana (Mouse-ear cress) PE=1 SV=1	Acyl-coenzyme A oxidase 4, peroxisomal -like protein [Gossypium arboreum]	Fatty acid degradation (ko00071);; alpha-Linolenic acid metabolism (ko00592);; Biosynthesis of unsaturated fatty acids (ko01040);; Fatty acid metabolism (ko01212);; Peroxisome (ko04146)
Gorai.001G247700	25.1369	20.5564	18.4809	89.3333	27.5539	38.5665	13.2756	20.2972	38.5374	27.5012	0.000516167	1.95563	up	0.900427	0.258047	normal	0.142543	1.28144	normal	0.920394	0.347958	normal	--	--	Molecular Function: magnesium ion binding (GO:0000287);; Molecular Function: ATP binding (GO:0005524);; Biological Process: DNA-templated transcription, elongation (GO:0006354);; Molecular Function: electron carrier activity (GO:0009055);; Cellular Component: chloroplast (GO:0009507);; Cellular Component: photosystem I (GO:0009522);; Cellular Component: chloroplast thylakoid membrane (GO:0009535)…	K02690|2.89739e-59|rcu:RCOM_2029740|hypothetical protein; K02690 photosystem I P700 chlorophyll a apoprotein A2 (A)	--	--	Photosystem I P700 chlorophyll a apoprotein A2 {ECO:0000255|HAMAP-Rule:MF_00482} OS=Vitis vinifera (Grape) PE=3 SV=1	conserved hypothetical protein [Ricinus communis]	Photosynthesis (ko00195)
Gorai.001G250000	0.936054	1.55639	2.45187	10.1714	2.83267	1.10036	0.792533	4.61939	7.51987	4.93234	0.000123181	2.46478	up	0.941369	0.226101	normal	7.80549e-06	3.00167	up	0.949621	0.0626575	normal	--	--	Cellular Component: nucleosome (GO:0000786);; Molecular Function: DNA binding (GO:0003677);; Cellular Component: nucleus (GO:0005634);; Cellular Component: nucleolus (GO:0005730);; Biological Process: nucleosome assembly (GO:0006334);; Cellular Component: chloroplast (GO:0009507);; Molecular Function: protein heterodimerization activity (GO:0046982);;	K11252|1.15191e-53|cam:101502541|probable histone H2B.3-like; K11252 histone H2B (A)	[B]	Chromatin structure and dynamics	Histone H2B GN=HIS2B OS=Gossypium hirsutum (Upland cotton) PE=2 SV=3	Histone superfamily protein [Theobroma cacao]	--
Gorai.001G250200	10.8459	41.7254	43.1125	26.9494	17.102	21.3128	25.8778	33.0537	29.9451	24.27	0.827389	-0.633909	normal	0.00578479	-1.33324	down	0.925086	0.305343	normal	0.876149	-0.448798	normal	[R]	General function prediction only	Biological Process: protein targeting to mitochondrion (GO:0006626);; Cellular Component: chloroplast (GO:0009507);; Cellular Component: chloroplast thylakoid membrane (GO:0009535);; Cellular Component: chloroplast thylakoid lumen (GO:0009543);; Cellular Component: chloroplast envelope (GO:0009941);;	--	--	--	protein SLOW GREEN 1, chloroplastic {ECO:0000303|PubMed:24420572} (Precursor) OS=Arabidopsis thaliana (Mouse-ear cress) PE=1 SV=1	Tetratricopeptide repeat (TPR)-like superfamily protein, putative [Theobroma cacao]	--
Gorai.001G250800	0.783357	54.1946	50.6581	27.2234	8.3235	1.79196	22.8365	66.3994	39.4036	34.2244	0.46142	-1.01248	normal	2.17625e-11	-2.54171	down	0.639301	0.827465	normal	0.0319581	-1.0013	normal	[O]	Posttranslational modification, protein turnover, chaperones	Biological Process: maltose metabolic process (GO:0000023);; Molecular Function: ATP binding (GO:0005524);; Cellular Component: nucleolus (GO:0005730);; Cellular Component: mitochondrion (GO:0005739);; Cellular Component: Golgi apparatus (GO:0005794);; Biological Process: phosphatidylglycerol biosynthetic process (GO:0006655);; Cellular Component: chloroplast stroma (GO:0009570);; Biological Proc…	K04077|0|tcc:TCM_011387|TCP-1/cpn60 chaperonin family protein isoform 1; K04077 chaperonin GroEL (A)	[O]	Posttranslational modification, protein turnover, chaperones	Chaperonin 60 subunit beta 4, chloroplastic (Precursor) GN=F28B23.11 OS=Arabidopsis thaliana (Mouse-ear cress) PE=1 SV=1	TCP-1/cpn60 chaperonin family protein isoform 1 [Theobroma cacao]	RNA degradation (ko03018)
Gorai.001G251900	5.71192	6.486	6.28119	19.3514	16.2066	9.90807	6.30915	7.6283	16.4758	14.6383	0.0042454	1.60661	up	0.00540578	1.34171	up	0.00729141	1.44591	up	0.040485	0.963097	normal	--	--	Cellular Component: nucleus (GO:0005634);; Biological Process: pattern specification process (GO:0007389);; Biological Process: organ morphogenesis (GO:0009887);; Biological Process: shoot system morphogenesis (GO:0010016);; Biological Process: maintenance of root meristem identity (GO:0010078);; Biological Process: stele development (GO:0010479);; Biological Process: gene silencing (GO:0016458);…	--	--	--	Transcription factor EMB1444 GN=EMB1444 OS=Arabidopsis thaliana (Mouse-ear cress) PE=2 SV=1	hypothetical protein F383_17833 [Gossypium arboreum]	--
Gorai.001G252100	1.45718	0.362923	1.08922	2.73585	2.09804	1.2331	0.84086	0.592317	2.54585	1.57551	3.24596e-05	2.66461	up	0.499037	0.949321	normal	0.0161625	1.65034	normal	0.190296	1.31921	normal	--	--	Cellular Component: nucleus (GO:0005634);; Biological Process: DNA-dependent DNA replication (GO:0006261);; Biological Process: phosphorus metabolic process (GO:0006793);; Cellular Component: chloroplast (GO:0009507);; Biological Process: chloroplast organization (GO:0009658);; Biological Process: gene silencing (GO:0016458);; Biological Process: regulation of nucleobase-containing compound metab…	K10727|0|tcc:TCM_004085|CDT1 A, putative; K10727 chromatin licensing and DNA replication factor 1 (A)	[L]	Replication, recombination and repair	CDT1-like protein a, chloroplastic (Precursor) GN=CDT1A OS=Arabidopsis thaliana (Mouse-ear cress) PE=1 SV=1	CDT1-like protein a, chloroplastic [Gossypium arboreum]	--
Gorai.001G253200	3.68239	1.73032	1.23961	7.44357	5.68248	65.6007	54.0828	30.5691	12.655	36.6123	0.000103253	2.07895	up	1.2779e-05	2.07653	up	3.40074e-06	-2.0919	down	0.966838	0.23286	normal	[GEPR]	--	Molecular Function: inorganic phosphate transmembrane transporter activity (GO:0005315);; Molecular Function: sugar:proton symporter activity (GO:0005351);; Cellular Component: nucleus (GO:0005634);; Cellular Component: mitochondrion (GO:0005739);; Cellular Component: vacuole (GO:0005773);; Cellular Component: Golgi apparatus (GO:0005794);; Cellular Component: plasma membrane (GO:0005886);; Biolo…	K08176|0|tcc:TCM_004051|Phosphate transporter 1,4; K08176 MFS transporter, PHS family, inorganic phosphate transporter (A)	[P]	Inorganic ion transport and metabolism	Inorganic phosphate transporter 1-4 GN=T7F6.11 OS=Arabidopsis thaliana (Mouse-ear cress) PE=1 SV=1	Phosphate transporter 1,4 [Theobroma cacao]	--
Gorai.001G255000	26.0009	22.975	20.7714	5.51275	6.28597	13.5967	15.6002	11.8206	9.39921	7.3102	6.06969e-05	-2.01918	down	2.92118e-05	-1.75786	down	0.698049	-0.681421	normal	0.44598	-0.70503	normal	[R]	General function prediction only	--	--	[T]	Signal transduction mechanisms	--	TBC1 domain family member 15 [Gossypium arboreum]	--
Gorai.001G255300	6.68605	6.51856	12.863	1.59174	2.4114	5.43094	5.20597	7.17042	0.315838	4.14458	0.339496	-1.76014	normal	0.00330687	-2.28713	down	0.259726	-2.4148	normal	0.903368	-0.805792	normal	--	--	--	--	--	--	--	Uncharacterized protein TCM_003962 [Theobroma cacao]	--
Gorai.001G255600	3.57953	4.57918	2.59039	1.27532	1.23798	4.746	7.03796	2.45962	3.59776	3.42681	0.00456507	-1.75395	down	0.271254	-1.07672	normal	0.372521	-0.911764	normal	0.853662	0.455462	normal	[Z]	Cytoskeleton	Biological Process: microtubule cytoskeleton organization (GO:0000226);; Biological Process: cell morphogenesis (GO:0000902);; Molecular Function: GTPase activity (GO:0003924);; Molecular Function: structural constituent of cytoskeleton (GO:0005200);; Molecular Function: protein binding (GO:0005515);; Molecular Function: GTP binding (GO:0005525);; Cellular Component: cell wall (GO:0005618);; Cell…	K07374|0|pda:103717748|tubulin alpha chain-like; K07374 tubulin alpha (A)	[Z]	Cytoskeleton	Tubulin alpha chain GN=TUBA OS=Prunus dulcis (Almond) PE=2 SV=1	alpha-tubulin [Gossypium hirsutum]	Phagosome (ko04145)
Gorai.001G256100	1.53935	8.71395	6.34091	1.06588	1.12631	2.17069	4.79587	2.53578	4.61181	1.84102	4.96227e-10	-2.99181	down	1.93532e-09	-2.45881	down	0.924852	-0.010448	normal	0.818837	-0.473426	normal	[V]	Defense mechanisms	Biological Process: polysaccharide biosynthetic process (GO:0000271);; Biological Process: response to superoxide (GO:0000303);; Molecular Function: calmodulin binding (GO:0005516);; Molecular Function: ATP binding (GO:0005524);; Cellular Component: nucleus (GO:0005634);; Cellular Component: plasma membrane (GO:0005886);; Biological Process: ATP catabolic process (GO:0006200);; Biological Process…	K05658|0|tcc:TCM_018479|ATP binding cassette subfamily B19 isoform 1; K05658 ATP-binding cassette, subfamily B (MDR/TAP), member 1 [EC:3.6.3.44] (A)	[Q]	Secondary metabolites biosynthesis, transport and catabolism	ABC transporter B family member 19 GN=MLD15.2 OS=Arabidopsis thaliana (Mouse-ear cress) PE=1 SV=1	ABC transporter B family member 19 [Gossypium arboreum]	ABC transporters (ko02010)
Gorai.001G256400	7.52118	12.7034	11.8715	3.41256	2.83373	6.85612	10.4675	8.60261	7.35975	3.72103	0.000516976	-1.86449	down	1.70618e-06	-2.06911	down	0.843416	-0.428692	normal	0.0085207	-1.19172	down	[E]	Amino acid transport and metabolism	Molecular Function: catalytic activity (GO:0003824);; Biological Process: single-organism metabolic process (GO:0044710);;	--	--	--	--	3-dehydroquinate synthase [Gossypium arboreum]	--
Gorai.001G256500	2.69489	8.97367	5.5937	2.47626	1.91731	1.22071	3.42874	7.26046	3.76319	1.79246	0.000807257	-1.82861	down	0.00345002	-1.51447	down	0.886128	0.174497	normal	1.14056e-07	-1.98438	down	--	--	Cellular Component: mitochondrion (GO:0005739);; Biological Process: plastid organization (GO:0009657);; Biological Process: gene expression (GO:0010467);; Biological Process: RNA metabolic process (GO:0016070);; Biological Process: developmental process (GO:0032502);;	--	[R]	General function prediction only	Pentatricopeptide repeat-containing protein At5g39980, chloroplastic (Precursor) GN=At5g39980 OS=Arabidopsis thaliana (Mouse-ear cress) PE=2 SV=1	Tetratricopeptide repeat (TPR)-like superfamily protein [Theobroma cacao]	--
Gorai.001G258100	22.3645	19.9416	20.9629	54.2155	60.1943	18.4551	24.9663	25.7867	28.4701	35.6121	0.0173856	1.48933	normal	0.000426883	1.55507	up	0.94522	0.311882	normal	0.896765	0.477826	normal	[O]	Posttranslational modification, protein turnover, chaperones	Molecular Function: ATP binding (GO:0005524);; Biological Process: response to stress (GO:0006950);; Biological Process: gamete generation (GO:0007276);; Biological Process: biosynthetic process (GO:0009058);; Biological Process: response to abiotic stimulus (GO:0009628);; Biological Process: root morphogenesis (GO:0010015);; Cellular Component: membrane (GO:0016020);; Biological Process: cellula…	--	[O]	Posttranslational modification, protein turnover, chaperones	26S protease regulatory subunit 6A homolog B GN=F7G19.2 OS=Arabidopsis thaliana (Mouse-ear cress) PE=1 SV=3	P-loop containing nucleoside triphosphate hydrolases superfamily protein [Theobroma cacao]	--
Gorai.001G258200	8.68819	15.5352	13.4302	3.84111	2.15265	12.7175	12.0511	7.95854	10.4751	8.46683	0.000117315	-1.97698	down	2.53221e-08	-2.33523	down	0.927049	0.0236713	normal	0.947462	0.0553933	normal	--	--	Molecular Function: inositol-polyphosphate 5-phosphatase activity (GO:0004445);; Biological Process: response to hormone (GO:0009725);; Molecular Function: phosphatidylinositol phosphate 5-phosphatase activity (GO:0034595);; Biological Process: single-organism cellular process (GO:0044763);; Biological Process: phosphatidylinositol dephosphorylation (GO:0046856);; Biological Process: anatomical s…	--	[U]	Intracellular trafficking, secretion, and vesicular transport	Type I inositol 1,4,5-trisphosphate 5-phosphatase CVP2 GN=CVP2 OS=Arabidopsis thaliana (Mouse-ear cress) PE=1 SV=2	DNAse I-like superfamily protein isoform 1 [Theobroma cacao]	--
Gorai.001G259200	7.89559	2.95088	2.14061	13.2139	10.909	3.94389	3.68634	3.9046	3.49592	5.0314	0.000299695	2.08498	up	1.37482e-05	2.2518	up	0.908423	0.00695368	normal	0.920394	0.347958	normal	[R]	General function prediction only	Molecular Function: binding (GO:0005488);; Biological Process: response to stress (GO:0006950);; Molecular Function: zinc ion binding (GO:0008270);; Biological Process: response to abiotic stimulus (GO:0009628);; Biological Process: response to hormone (GO:0009725);; Biological Process: response to jasmonic acid (GO:0009753);; Biological Process: hormone-mediated signaling pathway (GO:0009755);; …	--	[R]	General function prediction only	Zinc finger AN1 domain-containing stress-associated protein 12 GN=T19D11.2 OS=Arabidopsis thaliana (Mouse-ear cress) PE=2 SV=2	Zinc finger AN1 domain-containing stress-associated 12 -like protein [Gossypium arboreum]	--
Gorai.001G259400	9.92317	27.5877	18.7381	4.31423	7.73835	33.3404	36.7743	12.9573	9.97423	10.309	1.54041e-07	-2.63707	down	0.0354422	-1.21431	normal	0.000284454	-1.77793	down	0.885924	-0.354676	normal	[P]	Inorganic ion transport and metabolism	Molecular Function: peroxidase activity (GO:0004601);; Molecular Function: protein binding (GO:0005515);; Cellular Component: nucleus (GO:0005634);; Cellular Component: Golgi apparatus (GO:0005794);; Cellular Component: cytosol (GO:0005829);; Biological Process: ion transport (GO:0006811);; Biological Process: response to oxidative stress (GO:0006979);; Cellular Component: plant-type cell wall (G…	K00430|0|tcc:TCM_016814|Peroxidase 31, putative; K00430 peroxidase [EC:1.11.1.7] (A)	--	--	Peroxidase 31 (Precursor) OS=Arabidopsis thaliana (Mouse-ear cress) PE=2 SV=1	class III peroxidase [Gossypium hirsutum]	Phenylalanine metabolism (ko00360);; Phenylpropanoid biosynthesis (ko00940)
Gorai.001G259500	5.12015	3.07753	1.73784	4.08361	5.2252	4.26554	11.6546	8.40542	3.06706	4.72136	0.825481	0.432696	normal	0.0022733	1.61984	up	0.000409403	-1.78574	down	0.180581	-0.873203	normal	--	--	Biological Process: signal transduction (GO:0007165);; Biological Process: response to bacterium (GO:0009617);; Biological Process: defense response, incompatible interaction (GO:0009814);; Biological Process: regulation of cell death (GO:0010941);; Biological Process: regulation of cellular metabolic process (GO:0031323);; Biological Process: regulation of defense response (GO:0031347);; Biologi…	--	--	--	Senescence-associated carboxylesterase 101 (Precursor) GN=SAG101 OS=Arabidopsis thaliana (Mouse-ear cress) PE=1 SV=1	Senescence-associated gene 101, putative isoform 2 [Theobroma cacao]	--
Gorai.001G259700	1.88266	0.386894	3.19385	0.0862824	0.559684	9.25118	3.78198	1.5576	7.65474	0.906359	--	--	--	3.34426e-05	-2.65461	down	0.345277	0.95738	normal	0.890919	-0.7822	normal	--	--	Molecular Function: protein binding (GO:0005515);; Cellular Component: cell wall (GO:0005618);; Cellular Component: plasma membrane (GO:0005886);; Biological Process: circadian rhythm (GO:0007623);; Biological Process: response to salt stress (GO:0009651);; Biological Process: response to ethylene (GO:0009723);; Biological Process: response to abscisic acid (GO:0009737);; Biological Process: resp…	--	--	--	Gibberellin-regulated protein 14 (Precursor) GN=GASA14 OS=Arabidopsis thaliana (Mouse-ear cress) PE=1 SV=1	GA-stimulated transcript-like protein 4 [Gossypium hirsutum]	--
Gorai.001G261200	70.8779	67.1856	108.174	56.3552	29.5184	94.8357	40.2236	74.9457	102.436	71.5128	0.962393	-0.258928	normal	1.77098e-06	-1.91213	down	0.021856	1.38677	normal	0.986556	-0.0710949	normal	[O]	Posttranslational modification, protein turnover, chaperones	Biological Process: MAPK cascade (GO:0000165);; Biological Process: protein peptidyl-prolyl isomerization (GO:0000413);; Molecular Function: peptidyl-prolyl cis-trans isomerase activity (GO:0003755);; Biological Process: pentose-phosphate shunt (GO:0006098);; Biological Process: rRNA processing (GO:0006364);; Biological Process: protein folding (GO:0006457);; Biological Process: protein targeting…	--	--	--	Peptidyl-prolyl cis-trans isomerase, chloroplastic (Precursor) GN=TLP40 OS=Spinacia oleracea (Spinach) PE=1 SV=1	Cyclophilin 38 isoform 1 [Theobroma cacao]	--
Gorai.001G261300	13.6746	21.4534	18.5187	7.30102	8.41059	10.5934	13.571	18.679	13.7338	12.0559	0.00462425	-1.59556	down	0.0325618	-1.17313	normal	0.936354	0.0186718	normal	0.562336	-0.655563	normal	[RTKL]	--	Biological Process: regulation of response to biotic stimulus (GO:0002831);; Molecular Function: protein serine/threonine kinase activity (GO:0004674);; Molecular Function: receptor signaling protein serine/threonine kinase activity (GO:0004702);; Molecular Function: non-membrane spanning protein tyrosine kinase activity (GO:0004715);; Molecular Function: protein binding (GO:0005515);; Molecular …	--	[T]	Signal transduction mechanisms	Serine/threonine-protein kinase HT1 GN=HT1 OS=Arabidopsis thaliana (Mouse-ear cress) PE=1 SV=1	Serine/threonine-protein kinase HT1 [Gossypium arboreum]	--
Gorai.001G261700	6.4301	12.849	3.67716	3.71066	4.50757	2.02338	8.48677	8.54319	14.8893	11.5218	0.00269419	-1.68379	down	0.896313	0.198909	normal	0.558011	0.784113	normal	0.863101	0.408773	normal	--	--	Cellular Component: cytosol (GO:0005829);; Biological Process: cellular aromatic compound metabolic process (GO:0006725);; Biological Process: ion transport (GO:0006811);; Biological Process: response to toxic substance (GO:0009636);; Biological Process: response to salt stress (GO:0009651);; Molecular Function: transferase activity, transferring glycosyl groups (GO:0016757);; Biological Process:…	--	[GC]	--	Anthocyanidin 5,3-O-glucosyltransferase GN=RhGT1 OS=Rosa hybrid cultivar PE=2 SV=1	UDP-glucosyl transferase 88A1 [Theobroma cacao]	--
Gorai.001G262100	3.76902	14.9026	5.0876	2.86162	1.75337	1.66653	8.26647	3.37892	6.60262	2.2553	2.55859e-06	-2.43023	down	0.0349537	-1.4179	normal	0.885318	-0.200885	normal	0.822207	-0.618246	normal	--	--	Molecular Function: carboxylic ester hydrolase activity (GO:0004091);; Molecular Function: cholinesterase activity (GO:0004104);; Molecular Function: alpha-L-fucosidase activity (GO:0004560);; Biological Process: lipid metabolic process (GO:0006629);; Cellular Component: plant-type cell wall (GO:0009505);; Cellular Component: plasmodesma (GO:0009506);; Cellular Component: chloroplast stroma (GO:0…	--	--	--	GDSL esterase/lipase At3g27950 (Precursor) GN=At3g27950 OS=Arabidopsis thaliana (Mouse-ear cress) PE=2 SV=1	hypothetical protein F383_04246 [Gossypium arboreum]	--
Gorai.001G262200	86.6003	3.40032	6.47603	39.3517	59.7591	84.4526	9.90133	2.57705	4.76464	13.1005	9.65894e-14	3.4524	up	2.22045e-16	3.12261	up	0.215623	-1.02628	normal	9.5457e-13	2.31498	up	[H]	Coenzyme transport and metabolism	Cellular Component: cytoplasm (GO:0005737);; Cellular Component: mitochondrion (GO:0005739);; Molecular Function: L-aspartate oxidase activity (GO:0008734);; Molecular Function: electron carrier activity (GO:0009055);; Biological Process: NAD biosynthetic process (GO:0009435);; Cellular Component: chloroplast (GO:0009507);; Cellular Component: membrane (GO:0016020);; Molecular Function: ion bindi…	K00278|0|tcc:TCM_016883|L-aspartate oxidase 1 isoform 3; K00278 L-aspartate oxidase [EC:1.4.3.16] (A)	[C]	Energy production and conversion	L-aspartate oxidase, chloroplastic (Precursor) GN=AO OS=Arabidopsis thaliana (Mouse-ear cress) PE=2 SV=1	L-aspartate oxidase 1 [Gossypium arboreum]	Alanine, aspartate and glutamate metabolism (ko00250);; Nicotinate and nicotinamide metabolism (ko00760)
Gorai.001G262600	4.91679	2.25474	2.44985	5.29446	8.01457	3.68546	1.91237	2.47145	3.45023	2.13495	0.438138	1.07796	normal	0.0038256	1.72122	up	0.713768	0.865747	normal	0.953957	-0.271895	normal	--	--	--	--	--	--	--	Uncharacterized protein TCM_016889 [Theobroma cacao]	--
Gorai.001G263100	163.741	395.977	313.339	125.469	86.7089	393.623	472.892	353.076	383.485	356.663	0.00185419	-1.74651	down	3.79366e-06	-1.86732	down	0.98224	-0.257501	normal	0.992102	-0.028863	normal	[J]	Translation, ribosomal structure and biogenesis	Cellular Component: plastid large ribosomal subunit (GO:0000311);; Molecular Function: RNA binding (GO:0003723);; Molecular Function: structural constituent of ribosome (GO:0003735);; Cellular Component: ribosome (GO:0005840);; Biological Process: translation (GO:0006412);; Cellular Component: nucleoid (GO:0009295);; Cellular Component: plasmodesma (GO:0009506);; Cellular Component: chloroplast (…	K02935|1.83851e-61|tcc:TCM_016899|Ribosomal protein L12-A; K02935 large subunit ribosomal protein L7/L12 (A)	[J]	Translation, ribosomal structure and biogenesis	50S ribosomal protein L12, chloroplastic (Precursor) OS=Nicotiana sylvestris (Wood tobacco) PE=2 SV=1	Ribosomal protein L12-A [Theobroma cacao]	Ribosome (ko03010)
Gorai.001G264100	62.0204	4.38205	8.18855	34.2447	42.9719	46.9458	10.7846	0.806231	1.24375	7.30528	9.31926e-10	2.88777	up	1.8095e-08	2.20789	up	1.96876e-10	-3.09903	down	3.27072e-13	3.03308	up	[P]	Inorganic ion transport and metabolism	Cellular Component: plasma membrane (GO:0005886);; Cellular Component: chloroplast (GO:0009507);; Cellular Component: plant-type vacuole membrane (GO:0009705);; Molecular Function: nitrate transmembrane transporter activity (GO:0015112);; Biological Process: nitrate transport (GO:0015706);; Cellular Component: integral component of membrane (GO:0016021);; Biological Process: lateral root developm…	K02575|0|cic:CICLE_v10015129mg|hypothetical protein; K02575 MFS transporter, NNP family, nitrate/nitrite transporter (A)	--	--	High affinity nitrate transporter 2.7 GN=NRT2.7 OS=Arabidopsis thaliana (Mouse-ear cress) PE=2 SV=1	High affinity nitrate transporter 2.7 -like protein [Gossypium arboreum]	Nitrogen metabolism (ko00910)
Gorai.001G264900	2.00028	1.53341	1.37636	4.82667	3.01234	2.89909	1.36206	1.98332	1.43734	1.81034	0.00148944	1.71839	up	0.0386351	1.16191	normal	0.923722	0.211618	normal	0.961139	-0.136876	normal	--	--	Molecular Function: binding (GO:0005488);; Biological Process: organelle organization (GO:0006996);; Biological Process: flower development (GO:0009908);; Cellular Component: nuclear lumen (GO:0031981);; Biological Process: regulation of gene expression, epigenetic (GO:0040029);; Biological Process: primary metabolic process (GO:0044238);; Biological Process: cellular macromolecule metabolic proc…	--	[S]	Function unknown	Nuclear-pore anchor {ECO:0000303|PubMed:17513499, ECO:0000303|PubMed:21189294} OS=Arabidopsis thaliana (Mouse-ear cress) PE=1 SV=1	Uncharacterized protein TCM_016960 [Theobroma cacao]	--
Gorai.001G265200	3.7466	0.0855195	0.955726	3.02519	4.90279	11.1406	0.334435	0.828049	1.5572	3.01815	2.39141e-08	4.29939	up	4.1606e-05	2.1841	up	0.0585059	1.95326	normal	0.00384105	1.74226	up	--	--	Cellular Component: chloroplast (GO:0009507);; Biological Process: response to UV-B (GO:0010224);; Molecular Function: transferase activity, transferring hexosyl groups (GO:0016758);; Biological Process: single-organism metabolic process (GO:0044710);; Molecular Function: trans-zeatin O-beta-D-glucosyltransferase activity (GO:0050403);; Molecular Function: cis-zeatin O-beta-D-glucosyltransferase …	--	[GC]	--	UDP-glycosyltransferase 90A1 GN=UGT90A1 OS=Arabidopsis thaliana (Mouse-ear cress) PE=2 SV=1	hypothetical protein CICLE_v10015105mg [Citrus clementina]	--
Gorai.001G265400	9.05079	3.96143	17.3023	18.2975	17.4943	16.4958	4.57563	9.15005	10.6832	14.449	6.48445e-05	2.12543	up	0.877726	0.342873	normal	0.0249311	1.43387	normal	0.170538	0.88168	normal	--	--	Biological Process: phosphatidylinositol biosynthetic process (GO:0006661);;	--	--	--	--	Uncharacterized protein TCM_016972 [Theobroma cacao]	--
Gorai.001G266400	1.82123	2.56428	1.89101	0.0871085	0.676873	0.548093	1.30326	2.16974	0.276282	0.326888	0.000112996	-3.50612	down	0.612491	-1.30277	normal	0.607187	-1.64022	normal	0.00581595	-2.4893	down	--	--	Cellular Component: nucleus (GO:0005634);; Biological Process: response to salt stress (GO:0009651);;	K11364|1.25153e-156|tcc:TCM_016993|S tudor-like domain; K11364 SAGA-associated factor 29 (A)	[R]	General function prediction only	--	SAGA-associated factor 29 [Gossypium arboreum]	--
Gorai.001G266600	15.2251	22.9645	24.6832	7.36966	7.05982	8.64973	17.4871	7.47271	13.4722	8.49106	0.00196457	-1.69185	down	2.91282e-05	-1.76805	down	0.894924	-0.321762	normal	0.931391	0.16699	normal	--	--	Molecular Function: carboxylic ester hydrolase activity (GO:0004091);; Molecular Function: cholinesterase activity (GO:0004104);; Molecular Function: alpha-L-fucosidase activity (GO:0004560);; Biological Process: lipid metabolic process (GO:0006629);; Cellular Component: plant-type cell wall (GO:0009505);; Cellular Component: plasmodesma (GO:0009506);; Cellular Component: chloroplast stroma (GO:0…	--	--	--	GDSL esterase/lipase At5g14450 (Precursor) GN=At5g14450 OS=Arabidopsis thaliana (Mouse-ear cress) PE=2 SV=1	hypothetical protein F383_21105 [Gossypium arboreum]	--
Gorai.001G267400	21.181	24.4477	25.0062	7.08123	10.539	9.13555	8.6406	8.90222	6.79338	11.6409	0.00354128	-1.67207	down	0.0247835	-1.23849	normal	0.888093	-0.137489	normal	0.820846	0.498102	normal	--	--	Cellular Component: mitochondrion (GO:0005739);; Cellular Component: cytosol (GO:0005829);; Biological Process: response to heat (GO:0009408);; Biological Process: response to cold (GO:0009409);; Biological Process: response to salt stress (GO:0009651);; Biological Process: vegetative to reproductive phase transition of meristem (GO:0010228);; Biological Process: single-organism cellular process …	--	--	--	BAG family molecular chaperone regulator 2 GN=BAG2 OS=Arabidopsis thaliana (Mouse-ear cress) PE=1 SV=1	BAG family molecular chaperone regulator 2 [Gossypium arboreum]	--
Gorai.001G268600	43.0298	33.3571	13.605	57.7825	41.0873	15.1847	48.7324	70.6147	32.898	45.7509	0.745448	0.751667	normal	0.000242142	1.59349	up	0.888126	-0.48833	normal	0.677324	-0.638536	normal	--	--	Molecular Function: amine transmembrane transporter activity (GO:0005275);; Cellular Component: plasma membrane (GO:0005886);; Biological Process: N-terminal protein myristoylation (GO:0006499);; Biological Process: protein targeting to membrane (GO:0006612);; Biological Process: nucleotide transport (GO:0006862);; Biological Process: ER to Golgi vesicle-mediated transport (GO:0006888);; Biologic…	--	[E]	Amino acid transport and metabolism	Lysine histidine transporter 1 GN=LHT1 OS=Arabidopsis thaliana (Mouse-ear cress) PE=1 SV=1	Lysine histidine transporter 1 -like protein [Gossypium arboreum]	--
Gorai.001G269200	1.23812	8.22559	4.84564	1.86063	1.09636	1.93179	7.34969	2.39905	9.80043	3.30641	3.7469e-05	-2.13302	down	5.07073e-05	-1.95695	down	0.827467	0.501172	normal	0.850029	0.450248	normal	[S]	Function unknown	Molecular Function: protein kinase activity (GO:0004672);; Molecular Function: protein serine/threonine kinase activity (GO:0004674);; Molecular Function: binding (GO:0005488);; Molecular Function: ATP binding (GO:0005524);; Cellular Component: mitochondrion (GO:0005739);; Biological Process: cellular protein modification process (GO:0006464);; Biological Process: protein phosphorylation (GO:0006…	--	--	--	Probable inactive leucine-rich repeat receptor-like protein kinase At3g03770 (Precursor) GN=At3g03770 OS=Arabidopsis thaliana (Mouse-ear cress) PE=2 SV=1	hypothetical protein F383_11185 [Gossypium arboreum]	--
Gorai.001G269400	61.8052	6.36108	23.0261	37.3417	39.5839	80.5064	8.97761	10.8649	16.0668	18.0904	1.84338e-07	2.49903	up	0.557492	0.766085	normal	0.328852	0.93614	normal	0.423971	0.714544	normal	[F]	Nucleotide transport and metabolism	Cellular Component: mitochondrion (GO:0005739);; Biological Process: nucleobase-containing compound metabolic process (GO:0006139);; Biological Process: DNA-templated transcription, elongation (GO:0006354);; Biological Process: nucleoside phosphate metabolic process (GO:0006753);; Cellular Component: chloroplast thylakoid membrane (GO:0009535);; Cellular Component: chloroplast envelope (GO:000994…	K00939|1.67399e-150|tcc:TCM_017121|P-loop containing nucleoside triphosphate hydrolases superfamily protein, putative; K00939 adenylate kinase [EC:2.7.4.3] (A)	[F]	Nucleotide transport and metabolism	Probable adenylate kinase 7, mitochondrial (Precursor) GN=At3g01820 OS=Arabidopsis thaliana (Mouse-ear cress) PE=2 SV=1	hypothetical protein F383_11187 [Gossypium arboreum]	Purine metabolism (ko00230)
Gorai.001G269700	5.80709	10.9583	7.6542	3.42188	4.04778	3.05537	9.46463	4.32853	3.25065	1.79016	0.00284339	-1.67468	down	0.284446	-0.914225	normal	0.000884844	-1.7059	down	0.0110457	-1.26034	normal	--	--	Cellular Component: chromosome, centromeric region (GO:0000775);; Biological Process: mitotic nuclear division (GO:0007067);;	K11548|0|tcc:TCM_025645|Kinetochore protein nuf2 isoform 1; K11548 kinetochore protein Nuf2 (A)	[D]	Cell cycle control, cell division, chromosome partitioning	Filament-like plant protein 1 GN=FPP1 OS=Arabidopsis thaliana (Mouse-ear cress) PE=2 SV=1	Kinetochore protein nuf2 isoform 1 [Theobroma cacao]	--
Gorai.001G270100	1.43881	3.45854	3.04678	0.577407	1.25256	1.18821	2.48523	2.13376	1.77793	1.03148	9.99965e-05	-2.48671	down	0.15018	-1.22903	normal	0.843298	-0.44737	normal	0.488097	-1.01099	normal	[F]	Nucleotide transport and metabolism	Biological Process: transition metal ion transport (GO:0000041);; Biological Process: RNA splicing, via endonucleolytic cleavage and ligation (GO:0000394);; Molecular Function: uracil phosphoribosyltransferase activity (GO:0004845);; Molecular Function: uridine kinase activity (GO:0004849);; Molecular Function: ATP binding (GO:0005524);; Cellular Component: cytoplasm (GO:0005737);; Cellular Compo…	K00876|0|tcc:TCM_017168|Uridine kinase/uracil phosphoribosyltransferase 1 isoform 1; K00876 uridine kinase [EC:2.7.1.48] (A)	[TZ]	--	Putative uracil phosphoribosyltransferase (Precursor) GN=MHK7.10 OS=Arabidopsis thaliana (Mouse-ear cress) PE=1 SV=1	Uridine kinase-like protein 1, chloroplastic [Gossypium arboreum]	Pyrimidine metabolism (ko00240)
Gorai.001G273800	6.93971	0.744177	1.48906	18.1	22.0434	2.67495	1.21504	2.07368	1.49666	2.31885	5.55112e-16	4.35152	up	0	3.71794	up	0.917054	0.252962	normal	0.946993	0.129945	normal	--	--	Molecular Function: protein binding (GO:0005515);; Cellular Component: cytosol (GO:0005829);; Biological Process: trichome differentiation (GO:0010026);; Biological Process: heat acclimation (GO:0010286);; Biological Process: regulation of epidermal cell division (GO:0010482);; Cellular Component: intracellular membrane-bounded organelle (GO:0043231);; Biological Process: single-organism transpor…	--	--	--	GEM-like protein 5 GN=At5g13200 OS=Arabidopsis thaliana (Mouse-ear cress) PE=1 SV=1	GRAM domain family protein [Theobroma cacao]	--
Gorai.001G274600	154.061	5.66679	15.0503	107.434	36.5655	204.348	11.4381	3.14036	5.30221	6.89856	0	4.16794	up	0.00391787	1.37178	up	0.257048	-1.00416	normal	0.592321	0.73976	normal	[C]	Energy production and conversion	Biological Process: glycerol metabolic process (GO:0006071);; Biological Process: lipid metabolic process (GO:0006629);; Biological Process: phosphate ion transport (GO:0006817);; Molecular Function: glycerophosphodiester phosphodiesterase activity (GO:0008889);; Cellular Component: plastid (GO:0009536);; Biological Process: cellular response to phosphate starvation (GO:0016036);; Biological Proc…	--	[R]	General function prediction only	Glycerophosphodiester phosphodiesterase GDPD2 {ECO:0000305} OS=Arabidopsis thaliana (Mouse-ear cress) PE=2 SV=1	glycerophosphodiester phosphodiesterase gde1 [Gossypium arboreum]	--
Gorai.001G275000	8.58349	29.0676	29.1954	11.2447	0.518609	7.95692	18.4437	21.683	23.7688	11.6914	0.0407032	-1.34308	normal	0	-5.46648	down	0.845447	0.465594	normal	0.119686	-0.891053	normal	--	--	--	--	--	--	Pollen-specific protein-like At4g18596 (Precursor) GN=At4g18596 OS=Arabidopsis thaliana (Mouse-ear cress) PE=2 SV=1	Major pollen allergen Lol p 11 [Gossypium arboreum]	--
Gorai.002G001100	28.9631	35.9717	29.1893	7.67981	19.2173	61.3664	41.6554	32.525	26.6222	33.6646	5.80452e-06	-2.24436	down	0.74307	-0.596825	normal	0.774737	-0.627263	normal	0.961304	0.0369203	normal	--	--	Cellular Component: integral component of membrane (GO:0016021);;	--	[I]	Lipid transport and metabolism	Elongation of fatty acids protein 3-like GN=HOS3 OS=Arabidopsis thaliana (Mouse-ear cress) PE=2 SV=1	3-ketoacyl-CoA synthase [Gossypium raimondii]	--
Gorai.002G001500	10.0479	3.81991	4.37422	34.3714	35.0937	14.2705	4.33854	4.02659	9.03939	16.9766	3.24492e-11	3.12012	up	2.56462e-14	2.97392	up	0.186854	1.05547	normal	1.23102e-09	2.02727	up	[Z]	Cytoskeleton	Molecular Function: structural constituent of cytoskeleton (GO:0005200);; Molecular Function: protein binding (GO:0005515);; Molecular Function: ATP binding (GO:0005524);; Cellular Component: cell wall (GO:0005618);; Cellular Component: nucleolus (GO:0005730);; Cellular Component: cytoplasm (GO:0005737);; Cellular Component: mitochondrion (GO:0005739);; Cellular Component: cytosol (GO:0005829);; …	K10355|0|tcc:TCM_006446|Actin 7 isoform 1; K10355 actin, other eukaryote (A)	[Z]	Cytoskeleton	Actin-101 GN=AC101 OS=Solanum tuberosum (Potato) PE=3 SV=1	hypothetical protein F383_05741 [Gossypium arboreum]	--
Gorai.002G001900	29.3782	3.80411	1.66793	12.4862	11.9255	7.38778	5.16357	8.60713	2.95561	4.18216	0.00453579	1.70036	up	1.81734e-08	2.72713	up	0.718447	-0.701762	normal	0.109515	-1.06318	normal	--	--	Molecular Function: DNA binding (GO:0003677);; Molecular Function: sequence-specific DNA binding transcription factor activity (GO:0003700);; Cellular Component: nucleus (GO:0005634);; Biological Process: trehalose biosynthetic process (GO:0005992);; Biological Process: regulation of transcription, DNA-templated (GO:0006355);; Biological Process: proline biosynthetic process (GO:0006561);; Biolog…	--	--	--	Putative NAC domain-containing protein 94 GN=ANAC094 OS=Arabidopsis thaliana (Mouse-ear cress) PE=3 SV=1	NAC domain protein NAC57 [Gossypium hirsutum]	--
Gorai.002G002500	51.3039	193.343	93.5194	10.6531	13.596	196.357	252.02	59.2049	70.2692	66.4703	0	-4.23971	down	3.88578e-14	-2.86058	down	0.000105921	-1.86364	down	0.976552	0.116291	normal	[G]	Carbohydrate transport and metabolism	Molecular Function: transporter activity (GO:0005215);; Cellular Component: nucleus (GO:0005634);; Cellular Component: vacuole (GO:0005773);; Cellular Component: plasma membrane (GO:0005886);; Biological Process: glycolytic process (GO:0006096);; Biological Process: transport (GO:0006810);; Biological Process: calcium ion transport (GO:0006816);; Biological Process: iron ion transport (GO:0006826…	K09872|0|tcc:TCM_006606|Plasma membrane intrinsic protein 2,8 isoform 1; K09872 aquaporin PIP (A)	[G]	Carbohydrate transport and metabolism	Aquaporin PIP2-7, N-terminally processed GN=M4E13.150 OS=Arabidopsis thaliana (Mouse-ear cress) PE=1 SV=2	PIP protein [Gossypium hirsutum]	--
Gorai.002G003900	19.7957	62.3411	57.365	20.6419	16.1282	39.7217	20.1597	46.8687	46.4776	39.6471	0.00591002	-1.59004	down	3.49365e-06	-1.86631	down	0.0497613	1.25757	normal	0.966318	-0.254402	normal	[R]	General function prediction only	Cellular Component: nucleus (GO:0005634);; Cellular Component: cytosol (GO:0005829);; Molecular Function: alcohol dehydrogenase (NADP+) activity (GO:0008106);; Biological Process: response to cold (GO:0009409);; Biological Process: response to water deprivation (GO:0009414);; Cellular Component: chloroplast (GO:0009507);; Biological Process: response to salt stress (GO:0009651);; Molecular Functi…	K00011|0|tcc:TCM_006770|NAD(P)-linked oxidoreductase superfamily protein; K00011 aldehyde reductase [EC:1.1.1.21] (A)	[R]	General function prediction only	NADP-dependent D-sorbitol-6-phosphate dehydrogenase GN=S6PDH OS=Malus domestica (Apple) PE=2 SV=1	NADPH-dependent mannose-6-phosphate reductase [Gossypium hirsutum]	Pentose and glucuronate interconversions (ko00040);; Fructose and mannose metabolism (ko00051);; Galactose metabolism (ko00052);; Glycerolipid metabolism (ko00561)
Gorai.002G004400	146.278	8.62924	41.5428	54.6731	76.052	24.9319	9.90798	4.83473	5.78911	7.76192	3.89688e-08	2.58595	up	0.529716	0.836123	normal	0.751197	-0.580742	normal	0.573217	0.673871	normal	[I]	Lipid transport and metabolism	Molecular Function: farnesyl-diphosphate farnesyltransferase activity (GO:0004310);; Cellular Component: endoplasmic reticulum membrane (GO:0005789);; Cellular Component: plasma membrane (GO:0005886);; Biological Process: acetyl-CoA metabolic process (GO:0006084);; Biological Process: polyamine catabolic process (GO:0006598);; Biological Process: isoprenoid biosynthetic process (GO:0008299);; Bio…	K00801|0|tcc:TCM_006798|Squalene synthase 1 isoform 1; K00801 farnesyl-diphosphate farnesyltransferase [EC:2.5.1.21] (A)	[I]	Lipid transport and metabolism	Squalene synthase OS=Nicotiana benthamiana PE=2 SV=1	Squalene synthase [Gossypium arboreum]	Steroid biosynthesis (ko00100);; Sesquiterpenoid and triterpenoid biosynthesis (ko00909)
Gorai.002G005500	3.59138	1.92405	0.399826	7.87831	19.3762	8.74445	7.04301	11.0901	3.55633	7.40303	0.000821723	1.95257	up	0	5.22041	up	0.428409	-0.90544	normal	0.732157	-0.55668	normal	[Q]	Secondary metabolites biosynthesis, transport and catabolism	Biological Process: very long-chain fatty acid metabolic process (GO:0000038);; Biological Process: sulfur amino acid metabolic process (GO:0000096);; Biological Process: polysaccharide biosynthetic process (GO:0000271);; Cellular Component: extracellular region (GO:0005576);; Cellular Component: nucleus (GO:0005634);; Cellular Component: endoplasmic reticulum (GO:0005783);; Biological Process: a…	K15397|0|tcc:TCM_006881|3-ketoacyl-CoA synthase 4; K15397 3-ketoacyl-CoA synthase [EC:2.3.1.199] (A)	--	--	3-ketoacyl-CoA synthase 9 GN=KCS9 OS=Arabidopsis thaliana (Mouse-ear cress) PE=2 SV=1	3-ketoacyl-CoA synthase [Gossypium raimondii]	Fatty acid elongation (ko00062)
Gorai.002G005700	0.904439	0.668929	0.408838	0.199222	2.94811	5.76491	6.29731	15.0612	4.41209	13.7334	0.81596	-1.49254	normal	0.000213928	2.49062	up	0.80572	-0.481165	normal	0.94319	-0.153228	normal	--	--	Biological Process: very long-chain fatty acid metabolic process (GO:0000038);; Biological Process: sulfur amino acid metabolic process (GO:0000096);; Biological Process: polysaccharide biosynthetic process (GO:0000271);; Cellular Component: extracellular region (GO:0005576);; Cellular Component: nucleus (GO:0005634);; Cellular Component: endoplasmic reticulum (GO:0005783);; Biological Process: a…	K15397|0|tcc:TCM_006881|3-ketoacyl-CoA synthase 4; K15397 3-ketoacyl-CoA synthase [EC:2.3.1.199] (A)	--	--	3-ketoacyl-CoA synthase 4 GN=KCS4 OS=Arabidopsis thaliana (Mouse-ear cress) PE=2 SV=1	3-ketoacyl-CoA synthase 9 [Gossypium raimondii]	Fatty acid elongation (ko00062)
Gorai.002G006700	1.09546	0.131397	0.571646	2.32269	1.83738	5.56705	1.90876	1.28628	0.439535	4.1923	1.6146e-05	3.48537	up	0.14979	1.58416	normal	0.0523497	-1.85669	normal	0.0023409	1.6137	up	[R]	General function prediction only	Molecular Function: iron ion binding (GO:0005506);; Biological Process: ion transport (GO:0006811);; Biological Process: lipid biosynthetic process (GO:0008610);; Biological Process: response to light stimulus (GO:0009416);; Biological Process: response to external stimulus (GO:0009605);; Biological Process: response to hormone (GO:0009725);; Biological Process: post-embryonic development (GO:000…	K06892|0|tcc:TCM_006983|2-oxoglutarate (2OG) and Fe(II)-dependent oxygenase superfamily protein; K06892 feruloyl-CoA ortho-hydroxylase [EC:1.14.11.-] (A)	[QR]	--	Hyoscyamine 6-dioxygenase GN=H6H OS=Hyoscyamus niger (Black henbane) PE=1 SV=1	Protein SRG1 -like protein [Gossypium arboreum]	--
Gorai.002G007700	19.1943	17.4985	11.6053	22.5316	30.6154	8.32216	15.8392	28.2646	5.90722	11.4098	0.916232	0.371351	normal	0.00285301	1.39584	up	0.0184786	-1.35336	normal	0.000167923	-1.31691	down	[R]	General function prediction only	Molecular Function: nucleotide binding (GO:0000166);; Molecular Function: NADPH:quinone reductase activity (GO:0003960);; Cellular Component: mitochondrion (GO:0005739);; Cellular Component: peroxisome (GO:0005777);; Biological Process: fatty acid beta-oxidation (GO:0006635);; Molecular Function: zinc ion binding (GO:0008270);; Cellular Component: chloroplast (GO:0009507);; Cellular Component: me…	K07119|0|tcc:TCM_007040|ARP protein (REF) isoform 1; K07119 (A)	[R]	General function prediction only	(+)-pulegone reductase OS=Mentha piperita (Peppermint) PE=1 SV=1	Zinc-binding alcohol dehydrogenase domain-containing 2 [Gossypium arboreum]	--
Gorai.002G008600	16.8768	187.606	81.2607	24.8332	14.4421	36.5301	240.654	175.433	156.921	164.689	7.79498e-11	-3.00736	down	5.88316e-11	-2.49122	down	0.947113	-0.576589	normal	0.990748	-0.127642	normal	--	--	Biological Process: cell morphogenesis involved in differentiation (GO:0000904);; Molecular Function: protein binding (GO:0005515);; Cellular Component: cytoplasm (GO:0005737);; Biological Process: defense response (GO:0006952);; Biological Process: immune response (GO:0006955);; Biological Process: cellular response to nitrogen starvation (GO:0006995);; Cellular Component: plant-type cell wall (…	--	--	--	Uncharacterized protein At4g06744 (Precursor) GN=At4g06744 OS=Arabidopsis thaliana (Mouse-ear cress) PE=2 SV=1	Leucine-rich repeat family protein, putative [Theobroma cacao]	--
Gorai.002G009000	253.771	27.6207	129.711	121.953	131.759	163.723	37.2306	80.5081	28.7343	71.8631	2.93253e-05	2.06679	up	0.97795	-0.0199876	normal	0.908014	-0.33112	normal	0.971139	-0.197961	normal	[R]	General function prediction only	--	--	--	--	--	Kynurenine formamidase [Gossypium arboreum]	--
Gorai.002G009300	6.81849	2.28896	2.95179	0.983343	0.670838	10.3375	2.73176	2.07343	1.05738	0.593024	0.393625	-1.2544	normal	0.0027893	-2.08774	down	0.277081	-1.29174	normal	0.073361	-1.71763	normal	[KAD]	--	Biological Process: MAPK cascade (GO:0000165);; Molecular Function: DNA binding (GO:0003677);; Molecular Function: sequence-specific DNA binding transcription factor activity (GO:0003700);; Molecular Function: protein binding (GO:0005515);; Cellular Component: nucleus (GO:0005634);; Biological Process: protein targeting to membrane (GO:0006612);; Biological Process: purine nucleobase transport (G…	K09422|2.66491e-86|tcc:TCM_007138|Myb domain protein 73, putative; K09422 myb proto-oncogene protein, plant (A)	[K]	Transcription	Transcription factor MYB44 GN=K8K14.2 OS=Arabidopsis thaliana (Mouse-ear cress) PE=2 SV=1	Myb domain protein 73, putative [Theobroma cacao]	--
Gorai.002G009500	1.66777	2.33497	2.29319	8.99289	6.62698	3.85744	2.07093	3.69587	6.39864	7.81184	0.000669936	1.8698	up	0.00342915	1.51537	up	0.00400367	1.61437	up	0.0534746	1.02182	normal	[J]	Translation, ribosomal structure and biogenesis	Cellular Component: mitochondrion (GO:0005739);; Biological Process: RNA modification (GO:0009451);; Molecular Function: pseudouridine synthase activity (GO:0009982);; Biological Process: RNA metabolic process (GO:0016070);; Molecular Function: hydrolase activity, acting on glycosyl bonds (GO:0016798);; Biological Process: methylglyoxal catabolic process to D-lactate (GO:0019243);;	--	[A]	RNA processing and modification	RNA pseudouridine synthase 4, mitochondrial (Precursor) GN=At3g19440 OS=Arabidopsis thaliana (Mouse-ear cress) PE=2 SV=1	hypothetical protein F383_00972 [Gossypium arboreum]	--
Gorai.002G009600	1.95733	0.684038	0.460391	2.04015	3.95662	1.34997	3.19693	2.72428	1.49223	1.72909	0.697786	1.23947	normal	0.00032436	2.69247	up	0.632	-1.0172	normal	0.885287	-0.70592	normal	--	--	--	--	--	--	Basic secretory protease {ECO:0000303|PubMed:22773449} (Fragments) OS=Boswellia serrata (Indian frankincense) PE=1 SV=1	Plant basic secretory protein (BSP) family protein, putative [Theobroma cacao]	--
Gorai.002G011700	65.2316	32.4376	44.9808	216.49	182.222	55.5686	45.9043	77.2606	58.9678	68.2743	1.63828e-08	2.64923	up	1.64376e-06	1.93304	up	0.950964	0.340429	normal	0.980614	-0.212549	normal	[GEPR]	--	Molecular Function: sugar:proton symporter activity (GO:0005351);; Molecular Function: galactose transmembrane transporter activity (GO:0005354);; Molecular Function: glucose transmembrane transporter activity (GO:0005355);; Molecular Function: myo-inositol transmembrane transporter activity (GO:0005365);; Cellular Component: vacuolar membrane (GO:0005774);; Cellular Component: plasma membrane (G…	--	[R]	General function prediction only	Polyol transporter 5 GN=PLT5 OS=Arabidopsis thaliana (Mouse-ear cress) PE=1 SV=2	Polyol/monosaccharide transporter 5 [Theobroma cacao]	--
Gorai.002G015600	0.195176	60.3381	2.79718	14.29	1.03432	0.091758	26.2994	9.42571	16.0491	3.75184	1.86843e-05	-2.10843	down	0.0823984	-1.37168	normal	0.776846	-0.641527	normal	0.00121415	-1.3191	down	[C]	Energy production and conversion	Molecular Function: protein binding (GO:0005515);;	--	[O]	Posttranslational modification, protein turnover, chaperones	Chaperone protein dnaJ 20, chloroplastic (Precursor) GN=F18A5.220 OS=Arabidopsis thaliana (Mouse-ear cress) PE=1 SV=2	DNAJ heat shock N-terminal domain-containing protein, putative [Theobroma cacao]	--
Gorai.002G016600	0.472729	1.67273	1.68717	0.626938	0.241751	0.779498	1.79919	2.65837	1.64065	1.40313	0.173787	-1.36123	normal	7.57757e-05	-2.58442	down	0.89413	-0.0688166	normal	0.323941	-0.910996	normal	--	--	Cellular Component: chloroplast (GO:0009507);; Biological Process: embryo development ending in seed dormancy (GO:0009793);; Biological Process: xylem and phloem pattern formation (GO:0010051);; Biological Process: mRNA modification (GO:0016556);; Biological Process: photosynthesis, light reaction (GO:0019684);; Biological Process: cellular protein complex assembly (GO:0043623);;	--	[R]	General function prediction only	Pentatricopeptide repeat-containing protein At5g13270, chloroplastic (Precursor) GN=PCMP-H90 OS=Arabidopsis thaliana (Mouse-ear cress) PE=2 SV=1	Pentatricopeptide repeat (PPR) superfamily protein [Theobroma cacao]	--
Gorai.002G017500	20.7696	5.09707	36.0592	23.2298	30.0057	13.7622	5.04786	5.49632	10.8233	13.5339	1.86072e-05	2.11349	up	0.955874	-0.246027	normal	0.122569	1.11436	normal	0.000659523	1.2846	up	--	--	Cellular Component: nucleus (GO:0005634);; Biological Process: response to light stimulus (GO:0009416);; Cellular Component: chloroplast (GO:0009507);; Biological Process: response to red or far red light (GO:0009639);; Biological Process: response to salt stress (GO:0009651);; Biological Process: response to auxin (GO:0009733);; Biological Process: auxin-activated signaling pathway (GO:0009734);…	K14487|0|tcc:TCM_007996|Indole-3-acetic acid-amido synthetase GH3.5; K14487 auxin responsive GH3 gene family (A)	--	--	Probable indole-3-acetic acid-amido synthetase GH3.5 GN=OSJNBa0009C07.16 OS=Oryza sativa subsp. japonica (Rice) PE=2 SV=1	Indole-3-acetic acid-amido synthetase GH3.5 [Theobroma cacao]	Plant hormone signal transduction (ko04075)
Gorai.002G017600	232.746	105.496	307.169	139.87	120.406	183.011	46.5896	114.85	187.922	172.095	0.95268	0.323006	normal	0.00838321	-1.3452	down	3.85979e-06	2.07197	up	0.877492	0.535712	normal	--	--	Biological Process: rRNA processing (GO:0006364);; Cellular Component: chloroplast thylakoid membrane (GO:0009535);; Cellular Component: chloroplast thylakoid lumen (GO:0009543);; Biological Process: plastid organization (GO:0009657);; Biological Process: photosystem II repair (GO:0010206);; Biological Process: photosystem II assembly (GO:0010207);; Cellular Component: chloroplast photosystem II …	K08902|1.73032e-64|vvi:100263742|photosystem II repair protein PSB27-H1, chloroplastic; K08902 photosystem II Psb27 protein (A)	--	--	Photosystem II repair protein PSB27-H1, chloroplastic (Precursor) OS=Arabidopsis thaliana (Mouse-ear cress) PE=1 SV=1	Photosystem II family protein [Theobroma cacao]	Photosynthesis (ko00195)
Gorai.002G018000	3.76894	0.890329	2.67805	13.7388	5.84563	2.53299	1.59422	4.19479	9.48162	11.536	1.51323e-13	3.78741	up	0.0955597	1.12666	normal	1.16248e-07	2.53119	up	0.00017225	1.41399	up	--	--	Biological Process: respiratory burst involved in defense response (GO:0002679);; Molecular Function: DNA binding (GO:0003677);; Molecular Function: sequence-specific DNA binding transcription factor activity (GO:0003700);; Cellular Component: nucleolus (GO:0005730);; Biological Process: response to water deprivation (GO:0009414);; Biological Process: response to light stimulus (GO:0009416);; Bio…	--	--	--	Ethylene-responsive transcription factor ERF053 GN=ERF053 OS=Arabidopsis thaliana (Mouse-ear cress) PE=2 SV=1	AP2/ERF domain-containing transcription factor, putative [Theobroma cacao]	--
Gorai.002G018100	9.46504	5.53953	11.1599	87.7355	29.8151	7.70176	10.8021	42.7192	37.7902	51.1457	4.44089e-16	3.84056	up	0.00364441	1.39063	up	0.000217628	1.77217	up	0.958905	0.22223	normal	[O]	Posttranslational modification, protein turnover, chaperones	Molecular Function: ubiquitin-protein transferase activity (GO:0004842);; Molecular Function: protein binding (GO:0005515);; Cellular Component: endoplasmic reticulum membrane (GO:0005789);; Biological Process: response to osmotic stress (GO:0006970);; Biological Process: response to cold (GO:0009409);; Biological Process: response to water deprivation (GO:0009414);; Biological Process: response …	K10666|1.28795e-112|tcc:TCM_008094|RING membrane-anchor 1, putative isoform 1; K10666 E3 ubiquitin-protein ligase RNF5 [EC:6.3.2.19] (A)	[O]	Posttranslational modification, protein turnover, chaperones	E3 ubiquitin-protein ligase RMA1H1 GN=RMA1H1 OS=Capsicum annuum (Bell pepper) PE=1 SV=1	E3 ubiquitin-protein ligase RMA1H1 [Gossypium arboreum]	Protein processing in endoplasmic reticulum (ko04141)
Gorai.002G018900	0.794265	0.871647	0.294466	1.73752	1.50619	0.830371	3.48617	2.38018	1.61215	2.46565	0.46958	0.986723	normal	0.000605262	2.23671	up	0.242238	-1.04472	normal	0.936686	0.0496243	normal	[S]	Function unknown	Cellular Component: mitochondrion (GO:0005739);; Biological Process: ion transport (GO:0006811);; Biological Process: defense response (GO:0006952);; Biological Process: cellular process (GO:0009987);;	K13459|0|tcc:TCM_028306|Disease resistance protein family, putative isoform 1; K13459 disease resistance protein RPS2 (A)	[T]	Signal transduction mechanisms	Probable disease resistance protein At1g12280 GN=At1g12280 OS=Arabidopsis thaliana (Mouse-ear cress) PE=3 SV=1	Cc-nbs-lrr resistance protein, putative [Theobroma cacao]	Plant-pathogen interaction (ko04626)
Gorai.002G020300	91.381	21.1891	61.8096	115.163	139.935	83.3534	20.9739	60.4347	53.8391	104.195	1.83107e-06	2.30122	up	0.130713	1.11618	normal	0.039396	1.29911	normal	0.539277	0.752665	normal	--	--	Molecular Function: DNA binding (GO:0003677);; Molecular Function: sequence-specific DNA binding transcription factor activity (GO:0003700);; Molecular Function: binding (GO:0005488);; Molecular Function: protein binding (GO:0005515);; Cellular Component: nucleus (GO:0005634);; Biological Process: chloroplast organization (GO:0009658);; Biological Process: cytokinin-activated signaling pathway (G…	--	--	--	Transcription activator GLK1 GN=F23N11.11 OS=Arabidopsis thaliana (Mouse-ear cress) PE=2 SV=2	Transcription activator GLK1 -like protein [Gossypium arboreum]	--
Gorai.002G020600	7.88437	8.07873	17.4364	7.39026	4.82111	21.9358	8.46389	34.284	17.5098	13.0632	0.910382	-0.122788	normal	5.36684e-06	-1.87479	down	0.147458	1.09417	normal	3.0638e-05	-1.40302	down	[I]	Lipid transport and metabolism	Molecular Function: acyl-CoA dehydrogenase activity (GO:0003995);; Molecular Function: acyl-CoA oxidase activity (GO:0003997);; Cellular Component: nucleus (GO:0005634);; Cellular Component: peroxisome (GO:0005777);; Biological Process: fatty acid beta-oxidation (GO:0006635);; Biological Process: transport (GO:0006810);; Biological Process: defense response (GO:0006952);; Biological Process: cell…	K00232|0|tcc:TCM_008258|Acyl-CoA oxidase 3 isoform 1; K00232 acyl-CoA oxidase [EC:1.3.3.6] (A)	[IQ]	--	Acyl-coenzyme A oxidase 3, peroxisomal (Precursor) OS=Arabidopsis thaliana (Mouse-ear cress) PE=1 SV=1	Acyl-coenzyme A oxidase 3, peroxisomal -like protein [Gossypium arboreum]	Fatty acid degradation (ko00071);; alpha-Linolenic acid metabolism (ko00592);; Biosynthesis of unsaturated fatty acids (ko01040);; Fatty acid metabolism (ko01212);; Peroxisome (ko04146)
Gorai.002G020800	0.821224	0.746383	0.372951	4.11237	1.98957	0.102926	0.588723	2.97533	0.297929	0.520289	7.47807e-06	2.35133	up	6.62079e-06	2.36715	up	0.776733	-0.861963	normal	8.50021e-10	-2.48074	down	--	--	Molecular Function: protein binding (GO:0005515);; Cellular Component: cytoplasm (GO:0005737);; Biological Process: cellular protein modification process (GO:0006464);; Biological Process: cellular aromatic compound metabolic process (GO:0006725);; Biological Process: signal transduction (GO:0007165);; Biological Process: response to abiotic stimulus (GO:0009628);; Biological Process: post-embryo…	--	[S]	Function unknown	U-box domain-containing protein 44 GN=F2D10.27 OS=Arabidopsis thaliana (Mouse-ear cress) PE=1 SV=1	ARM repeat superfamily protein isoform 1 [Theobroma cacao]	--
Gorai.002G021100	5.40379	5.5318	7.49115	20.4404	16.1899	15.167	8.30067	11.2466	22.949	21.2551	0.00063936	1.87218	up	0.0318657	1.25154	normal	0.00187275	1.62582	up	0.133564	0.899281	normal	--	--	Cellular Component: nucleus (GO:0005634);; Biological Process: primary metabolic process (GO:0044238);; Biological Process: cellular macromolecule metabolic process (GO:0044260);; Biological Process: single-organism cellular process (GO:0044763);; Biological Process: nucleic acid metabolic process (GO:0090304);;	--	--	--	Mediator-associated protein 2 GN=At5g64680 OS=Arabidopsis thaliana (Mouse-ear cress) PE=1 SV=1	Transcription factor AP-2-beta [Gossypium arboreum]	--
Gorai.002G021200	51.1332	20.0978	26.6326	68.713	54.8187	80.6276	21.8464	31.3847	42.6539	54.0037	0.00129436	1.72506	up	0.0680196	1.10354	normal	0.192722	1.0561	normal	0.398504	0.732443	normal	--	--	Molecular Function: transporter activity (GO:0005215);; Cellular Component: nucleus (GO:0005634);; Biological Process: transport (GO:0006810);; Biological Process: cysteine biosynthetic process (GO:0019344);;	--	[I]	Lipid transport and metabolism	Patellin-5 GN=PATL5 OS=Arabidopsis thaliana (Mouse-ear cress) PE=1 SV=2	Sec14p-like phosphatidylinositol transfer family protein isoform 1 [Theobroma cacao]	--
Gorai.002G021900	13.7622	8.2726	11.8127	1.31592	3.43587	3.42816	5.03522	1.73923	1.22594	2.01742	2.06218e-06	-2.64451	down	0.000106111	-1.79572	down	0.00180136	-1.93916	down	0.948964	0.196334	normal	--	--	Molecular Function: protein binding (GO:0005515);; Cellular Component: cytoplasm (GO:0005737);; Cellular Component: cytosol (GO:0005829);; Biological Process: trichome differentiation (GO:0010026);; Biological Process: heat acclimation (GO:0010286);; Biological Process: regulation of epidermal cell division (GO:0010482);; Biological Process: single-organism transport (GO:0044765);; Biological Pro…	--	--	--	GEM-like protein 5 GN=At5g13200 OS=Arabidopsis thaliana (Mouse-ear cress) PE=1 SV=1	GRAM domain family protein [Theobroma cacao]	--
Gorai.002G022300	0.334719	5.54437	0.897136	1.86478	1.38971	0.133446	5.25058	1.70696	6.58918	4.0561	0.00812747	-1.59996	down	0.862739	0.500361	normal	0.876475	0.323125	normal	0.0167747	1.21245	normal	--	--	Molecular Function: sequence-specific DNA binding transcription factor activity (GO:0003700);; Molecular Function: protein binding (GO:0005515);; Cellular Component: nucleus (GO:0005634);; Cellular Component: plasma membrane (GO:0005886);; Biological Process: organelle organization (GO:0006996);; Biological Process: circadian rhythm (GO:0007623);; Molecular Function: zinc ion binding (GO:0008270)…	--	--	--	Zinc finger protein CONSTANS-LIKE 15 GN=COL15 OS=Arabidopsis thaliana (Mouse-ear cress) PE=2 SV=1	constans-like protein 3 [Gossypium hirsutum]	--
Gorai.002G022400	25.5454	44.7565	42.6291	10.7138	9.46465	37.3016	61.5231	20.0424	55.3268	50.3763	5.67461e-05	-2.04583	down	6.62562e-07	-2.07807	down	0.943649	0.00758023	normal	0.00226299	1.19225	up	--	--	Biological Process: regulation of cell growth (GO:0001558);; Molecular Function: protein kinase activity (GO:0004672);; Cellular Component: mitochondrion (GO:0005739);; Cellular Component: plasma membrane (GO:0005886);; Biological Process: cellular glucan metabolic process (GO:0006073);; Biological Process: protein phosphorylation (GO:0006468);; Biological Process: embryo sac development (GO:0009…	--	[R]	General function prediction only	Somatic embryogenesis receptor kinase 2 (Precursor) GN=SERK2 OS=Arabidopsis thaliana (Mouse-ear cress) PE=1 SV=1	Somatic embryogenesis receptor kinase 1 -like protein [Gossypium arboreum]	--
Gorai.002G023200	95.1555	16.1458	15.0083	26.2264	56.1379	107.246	24.26	23.8052	28.5131	51.8055	0.775836	0.713135	normal	7.23532e-06	1.82652	up	0.944853	0.29766	normal	0.00672081	1.09806	up	--	--	Molecular Function: glucose-6-phosphate dehydrogenase activity (GO:0004345);; Cellular Component: cytosol (GO:0005829);; Biological Process: chromatin assembly or disassembly (GO:0006333);; Biological Process: pentose-phosphate shunt, oxidative branch (GO:0009051);; Cellular Component: chloroplast stroma (GO:0009570);; Biological Process: response to blue light (GO:0009637);; Biological Process: …	K00036|0|tcc:TCM_008602|Glucose-6-phosphate 1-dehydrogenase 2 isoform 1; K00036 glucose-6-phosphate 1-dehydrogenase [EC:1.1.1.49] (A)	[G]	Carbohydrate transport and metabolism	Glucose-6-phosphate 1-dehydrogenase, chloroplastic (Precursor) OS=Nicotiana tabacum (Common tobacco) PE=2 SV=1	Glucose-6-phosphate 1-dehydrogenase-2C chloroplastic [Gossypium arboreum]	Pentose phosphate pathway (ko00030);; Glutathione metabolism (ko00480);; Carbon metabolism (ko01200)
Gorai.002G023600	2.75702	0.385503	0.466922	2.53223	3.73468	2.93202	2.98558	1.79048	2.74308	4.39198	0.000564622	2.46116	up	5.07282e-07	2.8637	up	0.892578	-0.0805435	normal	0.0330101	1.23015	normal	--	--	Biological Process: defense response (GO:0006952);; Biological Process: immune response (GO:0006955);; Biological Process: cell communication (GO:0007154);; Biological Process: signal transduction (GO:0007165);; Biological Process: primary metabolic process (GO:0044238);; Biological Process: cellular macromolecule metabolic process (GO:0044260);; Biological Process: single organism signaling (GO:…	--	[R]	General function prediction only	Putative leucine-rich repeat receptor-like serine/threonine-protein kinase At2g14440 (Precursor) GN=At2g14440 OS=Arabidopsis thaliana (Mouse-ear cress) PE=3 SV=1	Serine-threonine protein kinase, plant-type, putative isoform 2 [Theobroma cacao]	--
Gorai.002G025200	6.56687	11.5296	6.33509	3.52296	7.49946	32.4461	21.5514	23.2137	21.1316	21.374	0.000996494	-1.80157	down	0.910919	0.11879	normal	0.941603	-0.0263708	normal	0.959838	-0.149444	normal	[I]	Lipid transport and metabolism	Molecular Function: dodecenoyl-CoA delta-isomerase activity (GO:0004165);; Cellular Component: peroxisome (GO:0005777);; Biological Process: fatty acid beta-oxidation (GO:0006635);; Biological Process: toxin catabolic process (GO:0009407);; Biological Process: response to water deprivation (GO:0009414);; Biological Process: response to ethylene (GO:0009723);; Biological Process: abscisic acid-act…	--	--	--	--	Indole-3-butyric acid response 10 [Theobroma cacao]	--
Gorai.002G026400	281.276	183.406	254.719	614.454	391.004	450.471	135.812	248.245	336.771	267.711	0.00351873	1.70813	up	0.859176	0.699002	normal	0.017078	1.42201	normal	0.989321	0.0749554	normal	--	--	Molecular Function: electron carrier activity (GO:0009055);; Biological Process: response to water deprivation (GO:0009414);; Cellular Component: chloroplast thylakoid membrane (GO:0009535);; Biological Process: response to blue light (GO:0009637);; Biological Process: response to high light intensity (GO:0009644);; Biological Process: response to sucrose (GO:0009744);; Biological Process: photos…	--	--	--	Protein PROTON GRADIENT REGULATION 5, chloroplastic (Precursor) GN=PGR5 OS=Arabidopsis thaliana (Mouse-ear cress) PE=1 SV=1	Proton gradient regulation 5 [Theobroma cacao]	--
Gorai.002G028300	48.6219	97.049	59.0645	31.5818	35.3701	71.5368	72.4327	19.9222	32.5526	29.8233	0.00158021	-1.70913	down	0.66567	-0.688953	normal	0.165303	-1.08787	normal	0.747053	0.53842	normal	--	--	Molecular Function: signal transducer activity (GO:0004871);; Molecular Function: hormone activity (GO:0005179);; Biological Process: polyamine catabolic process (GO:0006598);; Biological Process: cell-cell signaling (GO:0007267);; Cellular Component: plant-type cell wall (GO:0009505);; Cellular Component: plasmodesma (GO:0009506);; Biological Process: phenylpropanoid metabolic process (GO:000969…	--	--	--	Rapid alkalinization factor 23 (Precursor) GN=MGL6.2 OS=Arabidopsis thaliana (Mouse-ear cress) PE=1 SV=1	Rapid alkalinization factor 1, putative [Theobroma cacao]	--
Gorai.002G033100	4.00941	2.97601	4.58609	13.6168	9.27871	1.75574	0.748398	9.64066	6.34002	11.4089	5.25035e-05	2.12787	up	0.240999	0.964574	normal	8.74414e-08	2.98578	up	0.922249	0.238555	normal	--	--	Biological Process: MAPK cascade (GO:0000165);; Molecular Function: DNA binding (GO:0003677);; Molecular Function: sequence-specific DNA binding transcription factor activity (GO:0003700);; Cellular Component: nucleus (GO:0005634);; Biological Process: protein targeting to membrane (GO:0006612);; Biological Process: response to cold (GO:0009409);; Biological Process: response to water deprivation…	--	--	--	NAC domain-containing protein 21/22 OS=Arabidopsis thaliana (Mouse-ear cress) PE=1 SV=2	NAC domain-containing 21/22 -like protein [Gossypium arboreum]	--
Gorai.002G034200	3.45478	4.34932	1.07948	10.5338	5.49406	4.20213	9.35465	11.418	4.25103	7.1921	0.515616	0.846721	normal	0.000159057	1.9261	up	0.368073	-0.911669	normal	0.278032	-0.785583	normal	[RTKL]	--	Biological Process: immune system process (GO:0002376);; Molecular Function: protein serine/threonine kinase activity (GO:0004674);; Cellular Component: nucleus (GO:0005634);; Cellular Component: plasma membrane (GO:0005886);; Biological Process: defense response (GO:0006952);; Biological Process: cell communication (GO:0007154);; Biological Process: response to organic substance (GO:0010033);; B…	--	--	--	G-type lectin S-receptor-like serine/threonine-protein kinase At1g11330 (Precursor) GN=At1g11330 OS=Arabidopsis thaliana (Mouse-ear cress) PE=2 SV=3	Serine/threonine kinases,protein kinases,ATP binding,sugar binding,kinases,carbohydrate binding, putative [Theobroma cacao]	--
Gorai.002G037000	3.25491	4.31773	3.06401	7.93899	10.8331	1.69359	1.28453	2.26126	5.53429	7.55599	0.535509	0.833739	normal	0.000247193	1.73434	up	0.000180089	2.10585	up	8.10182e-05	1.66673	up	[R]	General function prediction only	Cellular Component: cytoplasm (GO:0005737);; Biological Process: ion transport (GO:0006811);; Biological Process: toxin catabolic process (GO:0009407);; Biological Process: response to wounding (GO:0009611);; Biological Process: response to hormone (GO:0009725);; Biological Process: coumarin biosynthetic process (GO:0009805);; Biological Process: hydrogen peroxide-mediated programmed cell death (…	--	[QR]	--	Feruloyl CoA ortho-hydroxylase 1 GN=F6&apos;H1 OS=Arabidopsis thaliana (Mouse-ear cress) PE=1 SV=1	1-aminocyclopropane-1-carboxylate oxidase [Gossypium arboreum]	--
Gorai.002G039300	1.0783	3.67752	0.58452	0.810001	0.924541	0.940074	6.06007	0.658406	1.44008	0.783551	0.000109761	-2.09915	down	0.810633	0.628575	normal	4.88682e-05	-1.96291	down	0.94373	0.204177	normal	--	--	Molecular Function: ubiquitin thiolesterase activity (GO:0004221);; Molecular Function: protein binding (GO:0005515);; Biological Process: nucleobase-containing compound metabolic process (GO:0006139);; Biological Process: protein glycosylation (GO:0006486);; Biological Process: proteolysis (GO:0006508);; Molecular Function: cysteine-type peptidase activity (GO:0008234);; Biological Process: cell…	K11855|0|tcc:TCM_032321|Ubiquitin-specific protease 15, putative isoform 1; K11855 ubiquitin carboxyl-terminal hydrolase 36/42 [EC:3.4.19.12] (A)	[O]	Posttranslational modification, protein turnover, chaperones	Ubiquitin carboxyl-terminal hydrolase 15 GN=UBP15 OS=Arabidopsis thaliana (Mouse-ear cress) PE=2 SV=2	Ubiquitin carboxyl-terminal hydrolase 15 -like protein [Gossypium arboreum]	--
Gorai.002G039900	4.30488	2.40741	2.19685	8.56578	9.68992	4.68405	17.3473	15.991	2.20713	10.4881	0.00111871	1.86344	up	3.08349e-06	2.15496	up	2.73925e-09	-2.79226	down	0.6538	-0.600372	normal	[RTKL]	--	Biological Process: MAPK cascade (GO:0000165);; Biological Process: response to molecule of bacterial origin (GO:0002237);; Molecular Function: protein serine/threonine kinase activity (GO:0004674);; Molecular Function: binding (GO:0005488);; Cellular Component: plasma membrane (GO:0005886);; Biological Process: regulation of transcription, DNA-templated (GO:0006355);; Biological Process: protein…	--	[T]	Signal transduction mechanisms	Probable receptor-like protein kinase At5g39020 (Precursor) GN=At5g39020 OS=Arabidopsis thaliana (Mouse-ear cress) PE=2 SV=1	PR5-like receptor kinase [Theobroma cacao]	--
Gorai.002G040600	2.01431	1.53721	3.08754	0	0	1.60191	0.637842	0.986358	0.218811	0.414399	0.213531	-2.74109	normal	0.000262272	-3.74592	down	--	--	--	--	--	--	--	--	--	--	--	--	--	Heat stress transcription factor B-4b, putative [Theobroma cacao]	--
Gorai.002G040700	5.15059	3.51416	4.31178	0.123814	1.96499	4.34497	3.50816	4.43085	0.71578	1.24708	0.000313078	-3.39205	down	0.560541	-1.05096	normal	0.0564716	-1.95551	normal	0.0404781	-1.70037	normal	--	--	--	--	--	--	--	Heat stress transcription factor B-4b, putative [Theobroma cacao]	--
Gorai.002G040900	4.71545	3.15751	7.88707	1.42084	1.44154	5.99842	1.23722	3.19621	5.6014	10.8785	0.721599	-1.01167	normal	7.11829e-05	-2.34971	down	0.00286447	2.14093	up	0.000217668	1.75059	up	--	--	--	--	--	--	--	Heat stress transcription factor B-4b, putative [Theobroma cacao]	--
Gorai.002G041500	1.98529	1.07699	1.33158	3.62024	4.86365	1.25462	2.43493	6.49543	0.994852	2.29089	0.0319736	1.72029	normal	0.00318087	1.80106	up	0.571527	-1.09377	normal	0.00512149	-1.43959	down	[RTKL]	--	Biological Process: MAPK cascade (GO:0000165);; Biological Process: response to molecule of bacterial origin (GO:0002237);; Molecular Function: protein serine/threonine kinase activity (GO:0004674);; Cellular Component: plasma membrane (GO:0005886);; Biological Process: regulation of transcription, DNA-templated (GO:0006355);; Biological Process: protein targeting to membrane (GO:0006612);; Biolo…	--	[T]	Signal transduction mechanisms	Probable receptor-like protein kinase At5g39020 (Precursor) GN=At5g39020 OS=Arabidopsis thaliana (Mouse-ear cress) PE=2 SV=1	PR5-like receptor kinase [Theobroma cacao]	--
Gorai.002G042800	12.5847	6.22479	11.7596	17.7602	35.5348	14.0953	5.74214	17.3707	18.368	30.1049	0.0108509	1.50352	normal	0.000154673	1.62036	up	0.00029873	1.7339	up	0.30421	0.789928	normal	[R]	General function prediction only	Biological Process: cellular process (GO:0009987);; Cellular Component: cell part (GO:0044464);; Biological Process: single-organism process (GO:0044699);;	--	[R]	General function prediction only	C2 domain-containing protein At1g53590 OS=Arabidopsis thaliana (Mouse-ear cress) PE=1 SV=2	Uncharacterized protein F383_11132 [Gossypium arboreum]	--
Gorai.002G043200	116.116	9.41597	32.8848	157.518	251.465	45.3567	15.496	10.3692	8.43694	23.2797	0	4.05972	up	1.03251e-14	2.90518	up	0.547502	-0.807549	normal	0.00367077	1.13555	up	[Q]	Secondary metabolites biosynthesis, transport and catabolism	Biological Process: transition metal ion transport (GO:0000041);; Molecular Function: monooxygenase activity (GO:0004497);; Molecular Function: iron ion binding (GO:0005506);; Cellular Component: vacuole (GO:0005773);; Molecular Function: steroid hydroxylase activity (GO:0008395);; Molecular Function: electron carrier activity (GO:0009055);; Biological Process: response to light stimulus (GO:0009…	--	[QI]	--	Cytochrome P450 72A15 GN=CYP72A15 OS=Arabidopsis thaliana (Mouse-ear cress) PE=2 SV=1	Secologanin synthase [Gossypium arboreum]	--
Gorai.002G043400	48.8785	1.81927	13.3616	140.747	178.426	81.7628	9.74723	42.1191	15.8357	41.4619	0	6.22448	up	0	3.70701	up	0.599459	0.767853	normal	0.980211	-0.0170349	normal	[Q]	Secondary metabolites biosynthesis, transport and catabolism	Biological Process: transition metal ion transport (GO:0000041);; Cellular Component: vacuole (GO:0005773);; Molecular Function: steroid hydroxylase activity (GO:0008395);; Biological Process: response to light stimulus (GO:0009416);; Cellular Component: plasmodesma (GO:0009506);; Biological Process: response to auxin (GO:0009733);; Biological Process: response to brassinosteroid (GO:0009741);; B…	--	[QI]	--	Cytochrome P450 72A15 GN=CYP72A15 OS=Arabidopsis thaliana (Mouse-ear cress) PE=2 SV=1	Secologanin synthase [Gossypium arboreum]	--
Gorai.002G043600	0.237362	0.0329434	0.187377	0.75423	1.28996	0.319687	0.0767891	0.200257	0	0.0669403	0.00915054	3.26631	up	0.00590394	2.38735	up	--	--	--	--	--	--	[Q]	Secondary metabolites biosynthesis, transport and catabolism	Biological Process: transition metal ion transport (GO:0000041);; Cellular Component: vacuole (GO:0005773);; Molecular Function: steroid hydroxylase activity (GO:0008395);; Biological Process: response to light stimulus (GO:0009416);; Cellular Component: plasmodesma (GO:0009506);; Biological Process: response to auxin (GO:0009733);; Biological Process: response to brassinosteroid (GO:0009741);; B…	--	[QI]	--	Cytochrome P450 CYP72A219 OS=Panax ginseng (Korean ginseng) PE=2 SV=1	Secologanin synthase [Gossypium arboreum]	--
Gorai.002G046400	141.987	13.4639	45.5485	49.8395	85.5189	137.8	33.9601	23.4329	23.7124	62.9534	0.000546855	1.82842	up	0.532694	0.911496	normal	0.945581	-0.404692	normal	4.17444e-05	1.38971	up	[G]	Carbohydrate transport and metabolism	Biological Process: response to singlet oxygen (GO:0000304);; Molecular Function: alpha,alpha-trehalose-phosphate synthase (UDP-forming) activity (GO:0003825);; Molecular Function: trehalose-phosphatase activity (GO:0004805);; Cellular Component: cytoplasm (GO:0005737);; Cellular Component: cytosol (GO:0005829);; Biological Process: trehalose biosynthetic process (GO:0005992);; Biological Process…	K16055|0|tcc:TCM_032130|Trehalose-6-phosphate synthase isoform 1; K16055 trehalose 6-phosphate synthase/phosphatase [EC:2.4.1.15 3.1.3.12] (A)	[G]	Carbohydrate transport and metabolism	Alpha,alpha-trehalose-phosphate synthase [UDP-forming] 1 GN=TPS1 OS=Arabidopsis thaliana (Mouse-ear cress) PE=1 SV=1	Alpha,alpha-trehalose-phosphate synthase [UDP-forming] 1 -like protein [Gossypium arboreum]	Starch and sucrose metabolism (ko00500)
Gorai.002G047200	3.81914	2.88517	5.02054	8.91258	13.2745	5.44494	3.90203	8.80079	11.2225	14.0918	0.00717118	1.58879	up	0.00490804	1.37619	up	0.0030098	1.56178	up	0.531758	0.663237	normal	--	--	Biological Process: MAPK cascade (GO:0000165);; Molecular Function: sequence-specific DNA binding transcription factor activity (GO:0003700);; Cellular Component: nucleus (GO:0005634);; Biological Process: regulation of transcription, DNA-templated (GO:0006355);; Biological Process: protein targeting to membrane (GO:0006612);; Biological Process: response to osmotic stress (GO:0006970);; Biologic…	--	--	--	B-box zinc finger protein 22 {ECO:0000303|PubMed:19920209} GN=T30F21.7 OS=Arabidopsis thaliana (Mouse-ear cress) PE=1 SV=2	Light-regulated zinc finger protein 1, putative isoform 1 [Theobroma cacao]	--
Gorai.002G047500	78.1756	19.7011	32.3373	80.2358	133.039	16.7719	9.44895	15.1908	1.8593	18.6044	2.14856e-05	2.09216	up	5.08731e-08	2.12469	up	2.28777e-05	-2.17499	down	0.930139	0.262034	normal	[RTKL]	--	Biological Process: MAPK cascade (GO:0000165);; Biological Process: response to molecule of bacterial origin (GO:0002237);; Molecular Function: protein serine/threonine kinase activity (GO:0004674);; Cellular Component: extracellular region (GO:0005576);; Cellular Component: plasma membrane (GO:0005886);; Biological Process: regulation of transcription, DNA-templated (GO:0006355);; Biological Pro…	--	[T]	Signal transduction mechanisms	Probable receptor-like protein kinase At5g39020 (Precursor) GN=At5g39020 OS=Arabidopsis thaliana (Mouse-ear cress) PE=2 SV=1	hypothetical protein F383_13058 [Gossypium arboreum]	--
Gorai.002G048000	18.642	40.7725	35.1151	15.1555	9.67007	20.1002	23.8687	20.6433	25.8208	19.6375	0.0286259	-1.40082	normal	8.47079e-06	-1.82382	down	0.937601	0.205482	normal	0.960837	-0.0826185	normal	[J]	Translation, ribosomal structure and biogenesis	Molecular Function: structural constituent of ribosome (GO:0003735);; Cellular Component: cytosol (GO:0005829);; Cellular Component: ribosome (GO:0005840);; Biological Process: translation (GO:0006412);; Cellular Component: chloroplast stroma (GO:0009570);; Cellular Component: thylakoid (GO:0009579);; Biological Process: embryo development ending in seed dormancy (GO:0009793);; Cellular Component…	K02871|5.54783e-157|tcc:TCM_032080|Ribosomal protein L13 family protein; K02871 large subunit ribosomal protein L13 (A)	[J]	Translation, ribosomal structure and biogenesis	50S ribosomal protein L13, chloroplastic (Precursor) GN=T30F21.4 OS=Arabidopsis thaliana (Mouse-ear cress) PE=2 SV=1	Ribosomal protein L13 family protein [Theobroma cacao]	Ribosome (ko03010)
Gorai.002G048100	7.46277	12.0623	11.8163	3.81182	3.17881	2.88623	4.36878	3.20895	6.12934	4.01171	0.00340513	-1.64906	down	1.36741e-05	-1.88105	down	0.762605	0.559495	normal	0.903557	0.307962	normal	--	--	Cellular Component: extracellular region (GO:0005576);; Cellular Component: endosome (GO:0005768);; Cellular Component: vacuole (GO:0005773);; Cellular Component: Golgi apparatus (GO:0005794);; Cellular Component: trans-Golgi network (GO:0005802);; Biological Process: meiosis I (GO:0007127);; Cellular Component: plasmodesma (GO:0009506);; Biological Process: response to fungus (GO:0009620);; Biol…	--	--	--	Protein trichome birefringence-like 42 GN=TBL42 OS=Arabidopsis thaliana (Mouse-ear cress) PE=3 SV=1	Ribosomal S6 modification protein [Gossypium arboreum]	--
Gorai.002G048600	53.7276	15.4224	40.2608	55.9612	58.3945	48.9307	21.2091	83.0692	23.8783	53.3265	0.000251605	1.90068	up	0.926714	0.541799	normal	0.946225	0.313071	normal	0.819304	-0.643625	normal	[RTKL]	--	Molecular Function: nucleotide binding (GO:0000166);; Biological Process: respiratory burst involved in defense response (GO:0002679);; Molecular Function: protein kinase activity (GO:0004672);; Molecular Function: protein serine/threonine kinase activity (GO:0004674);; Molecular Function: protein binding (GO:0005515);; Molecular Function: ATP binding (GO:0005524);; Cellular Component: extracellu…	--	--	--	Probable leucine-rich repeat receptor-like serine/threonine-protein kinase At3g14840 (Precursor) GN=LRR-RLK OS=Arabidopsis thaliana (Mouse-ear cress) PE=2 SV=1	Leucine-rich repeat transmembrane protein kinase, putative isoform 2 [Theobroma cacao]	--
Gorai.002G049100	7.78907	5.29312	5.68073	14.3976	23.0617	4.80147	10.7644	14.083	9.93334	15.3708	0.0133258	1.47711	normal	2.57001e-07	2.06353	up	0.92764	0.0110254	normal	0.961231	0.0931296	normal	[S]	Function unknown	Molecular Function: protein kinase activity (GO:0004672);; Molecular Function: binding (GO:0005488);; Biological Process: ion transport (GO:0006811);; Biological Process: signal transduction (GO:0007165);; Biological Process: epidermis development (GO:0008544);; Biological Process: detection of external stimulus (GO:0009581);; Biological Process: detection of biotic stimulus (GO:0009595);; Biolog…	--	--	--	Putative receptor-like protein kinase At3g47110 (Precursor) GN=At3g47110 OS=Arabidopsis thaliana (Mouse-ear cress) PE=3 SV=1	Leucine-rich repeat protein kinase family protein, putative [Theobroma cacao]	--
Gorai.002G057300	6.23078	95.1286	34.4727	33.1377	7.48198	5.51658	39.1291	41.4363	62.5777	22.9214	0.0156377	-1.52411	normal	2.82492e-08	-2.16859	down	0.797689	0.742027	normal	0.145873	-0.864437	normal	[C]	Energy production and conversion	Molecular Function: ATP:ADP antiporter activity (GO:0005471);; Molecular Function: ATP binding (GO:0005524);; Biological Process: transport (GO:0006810);; Cellular Component: chloroplast envelope (GO:0009941);; Cellular Component: integral component of membrane (GO:0016021);; Cellular Component: chloroplast membrane (GO:0031969);;	K03301|0|tcc:TCM_028434|TLC ATP/ADP transporter isoform 1; K03301 ATP:ADP antiporter, AAA family (A)	--	--	Plastidic ATP/ADP-transporter OS=Solanum tuberosum (Potato) PE=2 SV=2	ADP,ATP carrier 1, chloroplastic -like protein [Gossypium arboreum]	--
Gorai.002G061300	6.05766	6.07938	17.0102	4.11632	3.93553	88.3425	3.60278	10.2019	31.4394	14.2781	0.756926	-0.582142	normal	1.94038e-07	-2.14926	down	1.12321e-12	3.11159	up	0.831784	0.460433	normal	--	--	Molecular Function: binding (GO:0005488);; Cellular Component: extracellular region (GO:0005576);; Biological Process: water transport (GO:0006833);; Biological Process: response to stress (GO:0006950);; Biological Process: metabolic process (GO:0008152);; Molecular Function: kinase activity (GO:0016301);; Biological Process: single-organism cellular process (GO:0044763);;	--	--	--	Epidermis-specific secreted glycoprotein EP1 (Precursor) GN=EP1 OS=Daucus carota (Wild carrot) PE=1 SV=1	epidermis-specific secreted glycoprotein EP1-like protein [Gossypium hirsutum]	--
Gorai.002G061400	472.586	67.6243	129.197	595.715	700.524	345.654	75.458	52.4504	84.3294	183.018	5.24413e-11	3.08015	up	2.59267e-09	2.35162	up	0.985057	0.145056	normal	6.16253e-08	1.70554	up	[C]	Energy production and conversion	Molecular Function: protein binding (GO:0005515);; Cellular Component: cytosol (GO:0005829);; Biological Process: glycolytic process (GO:0006096);; Biological Process: tricarboxylic acid cycle (GO:0006099);; Biological Process: water transport (GO:0006833);; Biological Process: hyperosmotic response (GO:0006972);; Biological Process: Golgi organization (GO:0007030);; Molecular Function: phosphoen…	K01595|0|tcc:TCM_031773|Phosphoenolpyruvate carboxylase 3 isoform 1; K01595 phosphoenolpyruvate carboxylase [EC:4.1.1.31] (A)	--	--	Phosphoenolpyruvate carboxylase, housekeeping isozyme GN=PPC16 OS=Glycine max (Soybean) PE=1 SV=1	Phosphoenolpyruvate carboxylase, housekeeping isozyme [Gossypium arboreum]	Pyruvate metabolism (ko00620);; Carbon fixation in photosynthetic organisms (ko00710);; Carbon metabolism (ko01200)
Gorai.002G061800	6.06147	10.5918	8.94573	2.68465	2.90962	8.70594	12.8948	3.87313	5.874	2.92146	7.90498e-05	-1.99552	down	8.45916e-05	-1.68321	down	0.111318	-1.14323	normal	0.884234	-0.360164	normal	[R]	General function prediction only	Molecular Function: phosphoprotein phosphatase activity (GO:0004721);; Molecular Function: protein binding (GO:0005515);; Cellular Component: nuclear envelope (GO:0005635);; Cellular Component: mitochondrion (GO:0005739);; Cellular Component: endoplasmic reticulum membrane (GO:0005789);; Biological Process: protein targeting to mitochondrion (GO:0006626);; Biological Process: amino acid transport…	--	[R]	General function prediction only	TPR repeat-containing thioredoxin TTL1 GN=TTL1 OS=Arabidopsis thaliana (Mouse-ear cress) PE=1 SV=1	Tetratricopetide-repeat thioredoxin-like 1 isoform 1 [Theobroma cacao]	--
Gorai.002G062200	54.4951	83.134	58.8211	11.8933	32.9974	77.0443	72.4634	92.5886	81.0023	101.963	2.34793e-09	-2.78033	down	0.527973	-0.825982	normal	0.968569	0.242967	normal	0.98678	0.145283	normal	[Q]	Secondary metabolites biosynthesis, transport and catabolism	Molecular Function: monooxygenase activity (GO:0004497);; Biological Process: steroid biosynthetic process (GO:0006694);; Biological Process: response to UV (GO:0009411);; Biological Process: unidimensional cell growth (GO:0009826);; Biological Process: regulation of hormone levels (GO:0010817);; Cellular Component: membrane (GO:0016020);; Molecular Function: oxidoreductase activity, acting on pa…	K07437|0|tcc:TCM_041721|Cytochrome P450, putative; K07437 cytochrome P450, family 26, subfamily A (A)	[QI]	--	Cytochrome P450 87A3 GN=OSJNBa0088I22.16 OS=Oryza sativa subsp. japonica (Rice) PE=2 SV=3	Cytochrome P450 [Gossypium arboreum]	--
Gorai.002G064700	2.34216	2.79708	4.44762	9.35858	5.26231	3.21755	5.34651	11.5909	12.3469	15.3806	0.00255931	1.7375	up	0.883144	0.276765	normal	0.0288211	1.31978	normal	0.85262	0.431214	normal	--	--	--	--	--	--	--	Aspartyl/glutamyl-tRNA (Asn/Gln) amidotransferase subunit B [Gossypium arboreum]	--
Gorai.002G064900	5.12547	26.4312	21.6694	3.71608	2.37994	23.8214	20.3812	14.4801	13.596	14.1245	9.35707e-10	-2.88983	down	3.33067e-16	-3.26769	down	0.822561	-0.581915	normal	0.961805	-0.0114837	normal	--	--	Molecular Function: sequence-specific DNA binding transcription factor activity (GO:0003700);; Cellular Component: nucleus (GO:0005634);; Biological Process: regulation of transcription, DNA-templated (GO:0006355);; Biological Process: sulfate transport (GO:0008272);; Biological Process: DNA mediated transformation (GO:0009294);; Biological Process: response to xenobiotic stimulus (GO:0009410);; …	--	--	--	Basic leucine zipper 61 GN=BZIP61 OS=Arabidopsis thaliana (Mouse-ear cress) PE=1 SV=1	Transcription factor VIP1 -like protein [Gossypium arboreum]	--
Gorai.002G066900	1.46554	7.31208	8.07335	2.74432	2.01018	1.68426	4.80258	5.65085	7.67166	4.6845	0.0529712	-1.41956	normal	0.000133909	-1.96073	down	0.660897	0.692618	normal	0.858707	-0.45483	normal	--	--	Molecular Function: nucleic acid binding (GO:0003676);; Molecular Function: exonuclease activity (GO:0004527);; Cellular Component: mitochondrion (GO:0005739);; Biological Process: pyrimidine ribonucleotide biosynthetic process (GO:0009220);;	K18418|0|tcc:TCM_031646|Polynucleotidyl transferase, ribonuclease H-like superfamily protein, putative; K18418 ERI1 exoribonuclease 3 [EC:3.1.-.-] (A)	[L]	Replication, recombination and repair	Uncharacterized exonuclease domain-containing protein At3g15140 GN=At3g15140 OS=Arabidopsis thaliana (Mouse-ear cress) PE=2 SV=1	hypothetical protein F383_11052 [Gossypium arboreum]	--
Gorai.002G067600	16.212	7.16462	6.51075	11.1907	17.5814	15.3827	19.489	8.69507	13.1024	8.82859	0.799104	0.502966	normal	0.00479502	1.42011	up	0.788774	-0.541249	normal	0.937898	-0.00818675	normal	--	--	Biological Process: MAPK cascade (GO:0000165);; Molecular Function: DNA binding (GO:0003677);; Molecular Function: sequence-specific DNA binding transcription factor activity (GO:0003700);; Molecular Function: protein binding (GO:0005515);; Cellular Component: nucleus (GO:0005634);; Cellular Component: cytosol (GO:0005829);; Cellular Component: plasma membrane (GO:0005886);; Biological Process: r…	K09286|4.54086e-42|tcc:TCM_031608|Ethylene responsive element binding factor 4, putative; K09286 EREBP-like factor (A)	--	--	Ethylene-responsive transcription factor 4 GN=At3g15210 OS=Arabidopsis thaliana (Mouse-ear cress) PE=1 SV=1	Ethylene responsive element binding factor 4, putative [Theobroma cacao]	--
Gorai.002G067700	9.26977	18.9052	10.1317	5.33976	3.28704	3.85895	13.919	12.3815	7.48088	6.90378	0.00132413	-1.80441	down	0.00429754	-1.59264	down	0.449803	-0.865669	normal	0.245632	-0.883607	normal	--	--	Cellular Component: nucleus (GO:0005634);; Biological Process: fatty acid beta-oxidation (GO:0006635);; Biological Process: cell wall modification involved in abscission (GO:0009830);;	--	[R]	General function prediction only	Protein yippee-like At5g53940 GN=At5g53940 OS=Arabidopsis thaliana (Mouse-ear cress) PE=2 SV=1	Yippee family zinc-binding protein, putative isoform 1 [Theobroma cacao]	--
Gorai.002G068700	25.7378	49.5221	24.1124	4.04701	7.58984	36.0881	127.42	28.8553	22.8701	21.7335	3.57412e-11	-3.4686	down	0.00936005	-1.48929	down	3.98814e-07	-2.27974	down	0.862775	-0.405427	normal	--	--	Cellular Component: mitochondrion (GO:0005739);; Cellular Component: plasma membrane (GO:0005886);;	--	--	--	--	unknown [Lotus japonicus]	--
Gorai.002G069700	5.67239	1.96271	11.8632	3.33718	1.70742	0.895302	0.297017	0.66608	2.93511	0.961358	0.61	0.771623	normal	2.65526e-11	-2.72378	down	3.27845e-08	3.13656	up	0.911603	0.541725	normal	--	--	Molecular Function: transmembrane signaling receptor activity (GO:0004888);; Molecular Function: protein binding (GO:0005515);; Cellular Component: cytosol (GO:0005829);; Cellular Component: chloroplast outer membrane (GO:0009707);; Biological Process: protein targeting to chloroplast (GO:0045036);;	--	--	--	Proton pump-interactor 1 GN=PPI1 OS=Arabidopsis thaliana (Mouse-ear cress) PE=1 SV=2	Translation initiation factor IF-2 [Gossypium arboreum]	--
Gorai.002G069900	0.852782	2.04883	4.46843	1.00053	0.309268	1.15282	1.72154	1.4265	1.63688	0.877343	0.390461	-1.08297	normal	2.59304e-12	-3.67992	down	0.898173	0.0175903	normal	0.824236	-0.706706	normal	--	--	--	--	--	--	--	Putative tRNA (Met) cytidine acetyltransferase [Gossypium arboreum]	--
Gorai.002G072200	0.707529	6.46183	4.72941	4.2002	1.66275	0.44379	3.58519	6.37335	15.0265	4.42238	0.649681	-0.724129	normal	0.00764778	-1.45674	down	5.56816e-06	2.09339	up	0.736032	-0.553243	normal	--	--	Cellular Component: integral component of membrane (GO:0016021);;	K15377|0|tcc:TCM_031421|Plasma-membrane choline transporter family protein isoform 1; K15377 solute carrier family 44 (choline transporter-like protein), member 2/4/5 (A)	[I]	Lipid transport and metabolism	--	Choline transporter-like protein 2 [Gossypium arboreum]	--
Gorai.002G072600	5.85647	9.64294	9.59839	38.263	76.7622	16.7141	46.7509	24.213	37.7258	58.3708	7.02699e-05	1.99317	up	3.10862e-15	3.00561	up	0.949384	-0.223955	normal	0.000464918	1.25421	up	--	--	Biological Process: response to wounding (GO:0009611);; Molecular Function: adenyl nucleotide binding (GO:0030554);;	--	--	--	CBS domain-containing protein CBSX5 GN=CBSX5 OS=Arabidopsis thaliana (Mouse-ear cress) PE=2 SV=2	CBS domain-containing CBSX5 -like protein [Gossypium arboreum]	--
Gorai.002G073600	1.30421	0.21212	0.321962	1.27195	1.6998	2.8046	3.31226	6.90268	0.858764	2.83136	0.0119067	2.27219	normal	0.00180286	2.2258	up	0.00252677	-1.83531	down	0.00277721	-1.27503	down	[V]	Defense mechanisms	Molecular Function: ATP binding (GO:0005524);; Cellular Component: plasma membrane (GO:0005886);; Biological Process: ATP catabolic process (GO:0006200);; Biological Process: response to water deprivation (GO:0009414);; Cellular Component: chloroplast (GO:0009507);; Biological Process: response to abscisic acid (GO:0009737);; Biological Process: cellular process (GO:0009987);; Biological Process:…	--	[Q]	Secondary metabolites biosynthesis, transport and catabolism	ABC transporter G family member 9 GN=F27G19.20 OS=Arabidopsis thaliana (Mouse-ear cress) PE=3 SV=2	White-brown-complex ABC transporter family [Theobroma cacao]	--
Gorai.002G073700	48.0432	3.0701	10.4819	19.4331	21.9344	13.9579	3.11769	9.54375	8.6406	3.20223	1.71343e-07	2.58059	up	0.0814927	1.07703	normal	0.0103824	1.49044	normal	6.15554e-05	-1.59484	down	--	--	Biological Process: MAPK cascade (GO:0000165);; Biological Process: response to hypoxia (GO:0001666);; Molecular Function: DNA binding (GO:0003677);; Molecular Function: sequence-specific DNA binding transcription factor activity (GO:0003700);; Cellular Component: nucleus (GO:0005634);; Biological Process: regulation of transcription, DNA-templated (GO:0006355);; Biological Process: protein targe…	--	--	--	NAC domain-containing protein 72 GN=F27G19.10 OS=Arabidopsis thaliana (Mouse-ear cress) PE=2 SV=1	NAC domain protein NAC4 [Gossypium hirsutum]	--
Gorai.002G073800	1.30612	0.507951	1.50235	10.1912	9.80082	2.65501	0.365903	2.83811	3.051	13.5114	1.15463e-14	4.17149	up	2.30991e-09	2.58072	up	2.24107e-06	2.81257	up	4.32008e-11	2.21944	up	--	--	Biological Process: MAPK cascade (GO:0000165);; Biological Process: response to hypoxia (GO:0001666);; Molecular Function: DNA binding (GO:0003677);; Molecular Function: sequence-specific DNA binding transcription factor activity (GO:0003700);; Cellular Component: nucleus (GO:0005634);; Biological Process: transcription, DNA-templated (GO:0006351);; Biological Process: regulation of transcription…	--	--	--	NAC domain-containing protein 18 GN=F14G24.15 OS=Arabidopsis thaliana (Mouse-ear cress) PE=2 SV=1	NAC domain protein NAC53 [Gossypium hirsutum]	--
Gorai.002G074300	28.2092	4.55318	8.94583	17.2673	20.5317	23.3976	5.72694	6.83188	13.6171	13.4619	0.000672812	1.79811	up	0.116247	1.0346	normal	0.0849412	1.16549	normal	0.0665712	0.937006	normal	--	--	Molecular Function: methyltransferase activity (GO:0008168);; Biological Process: methylation (GO:0032259);;	--	--	--	2-phytyl-1,4-beta-naphthoquinone methyltransferase, chloroplastic (Precursor) GN=MENG OS=Arabidopsis thaliana (Mouse-ear cress) PE=1 SV=2	Demethylmenaquinone methyltransferase [Gossypium arboreum]	--
Gorai.002G075100	158.001	107.456	42.049	210.728	200.653	35.4238	132.082	202.924	24.9439	40.1106	0.50914	0.953382	normal	2.44857e-08	2.18051	up	1.10425e-07	-2.35831	down	8.10463e-15	-2.35004	down	--	--	--	--	--	--	--	Protein translocase subunit SecA [Gossypium arboreum]	--
Gorai.002G075800	7.41701	1.87197	4.74681	4.0418	14.7379	7.80823	0.554656	0.98902	1.31304	2.06026	0.485692	0.953669	normal	0.00126316	1.51953	up	0.736421	1.07258	normal	0.672797	0.962794	normal	--	--	--	--	--	--	--	UDP-glucuronosyltransferase 2B1 [Gossypium arboreum]	--
Gorai.002G076400	531.515	312.537	2070.59	688.355	475.834	371.117	7.34099	346.458	390.372	342.041	0.598626	1.10141	normal	1.53975e-07	-2.13003	down	0	5.73935	up	0.994557	-0.0577761	normal	--	--	Cellular Component: chloroplast (GO:0009507);; Cellular Component: photosystem I (GO:0009522);; Cellular Component: photosystem II (GO:0009523);; Cellular Component: chloroplast thylakoid membrane (GO:0009535);; Biological Process: response to red or far red light (GO:0009639);; Biological Process: photosynthesis, light harvesting (GO:0009765);; Cellular Component: membrane (GO:0016020);; Cellula…	K08914|0|tcc:TCM_031308|Light-harvesting chlorophyll B-binding protein 3; K08914 light-harvesting complex II chlorophyll a/b binding protein 3 (A)	--	--	Chlorophyll a-b binding protein 13, chloroplastic (Precursor) GN=CAB13 OS=Solanum lycopersicum (Tomato) PE=1 SV=1	Chlorophyll a-b binding 13, chloroplastic [Gossypium arboreum]	Photosynthesis - antenna proteins (ko00196)
Gorai.002G076600	77.619	40.8955	48.9892	146.973	92.474	96.4276	29.5407	71.9232	89.3409	71.3905	0.00168605	1.77534	up	0.754773	0.790897	normal	0.00432209	1.55285	up	0.991317	-0.0266719	normal	--	--	Molecular Function: intracellular cAMP activated cation channel activity (GO:0005222);; Molecular Function: inward rectifier potassium channel activity (GO:0005242);; Molecular Function: calcium channel activity (GO:0005262);; Molecular Function: calmodulin binding (GO:0005516);; Cellular Component: plasma membrane (GO:0005886);; Biological Process: ion transport (GO:0006811);; Biological Process…	--	[PT]	--	Cyclic nucleotide-gated ion channel 4 GN=MDK4.7 OS=Arabidopsis thaliana (Mouse-ear cress) PE=2 SV=2	Cyclic nucleotide-gated ion channel 4 -like protein [Gossypium arboreum]	--
Gorai.002G076700	150.104	0.17382	6.90952	34.0447	46.488	96.2974	1.24022	0.835164	0.385487	1.78972	0	6.25045	up	1.00332e-09	2.69245	up	--	--	--	--	--	--	--	--	Molecular Function: microtubule motor activity (GO:0003777);; Cellular Component: microtubule associated complex (GO:0005875);; Biological Process: microtubule-based process (GO:0007017);; Cellular Component: dynein complex (GO:0030286);; Cellular Component: axoneme (GO:0035085);; Biological Process: motile cilium assembly (GO:0044458);;	K10418|3.51115e-62|tcc:TCM_031304|Dynein light chain type 1 family protein; K10418 dynein light chain LC8-type (A)	[Z]	Cytoskeleton	Dynein 8 kDa light chain, flagellar outer arm OS=Chlamydomonas reinhardtii (Chlamydomonas smithii) PE=1 SV=1	Dynein light chain LC6, flagellar outer arm [Gossypium arboreum]	--
Gorai.002G077100	8.35616	5.76781	3.53253	11.0941	10.3104	6.17544	12.2669	15.7763	10.5665	6.98154	0.41581	0.927333	normal	0.00106292	1.53397	up	0.924028	-0.125192	normal	0.00434954	-1.14307	down	--	--	Biological Process: reproduction (GO:0000003);; Molecular Function: diacylglycerol kinase activity (GO:0004143);; Biological Process: response to stress (GO:0006950);; Biological Process: protein kinase C-activating G-protein coupled receptor signaling pathway (GO:0007205);; Cellular Component: chloroplast (GO:0009507);; Biological Process: response to ethylene (GO:0009723);; Cellular Component: …	K00901|0|tcc:TCM_031295|Diacylglycerol kinase 5; K00901 diacylglycerol kinase (ATP) [EC:2.7.1.107] (A)	[IT]	--	Diacylglycerol kinase 5 GN=DGK5 OS=Arabidopsis thaliana (Mouse-ear cress) PE=2 SV=1	Diacylglycerol kinase theta [Gossypium arboreum]	Glycerolipid metabolism (ko00561);; Glycerophospholipid metabolism (ko00564);; Phosphatidylinositol signaling system (ko04070)
Gorai.002G077700	126.575	3.58558	15.3991	14.1961	27.4704	112.79	16.1211	5.93953	7.86905	12.5047	0.000290964	1.95426	up	0.540566	0.75424	normal	0.235225	-1.0098	normal	0.0402742	1.04085	normal	--	--	Molecular Function: protein binding (GO:0005515);; Cellular Component: nucleus (GO:0005634);; Cellular Component: cytoplasm (GO:0005737);; Cellular Component: plasma membrane (GO:0005886);; Biological Process: response to wounding (GO:0009611);; Biological Process: photomorphogenesis (GO:0009640);; Biological Process: blue light signaling pathway (GO:0009785);; Biological Process: coumarin biosyn…	--	--	--	B-box zinc finger protein 32 {ECO:0000303|PubMed:19920209} OS=Arabidopsis thaliana (Mouse-ear cress) PE=1 SV=1	hypothetical protein F383_17993 [Gossypium arboreum]	--
[truncated: 3,870 more rows]

## Sheet: Table S3
Table S3. DEGs of G.trilobum
[truncated: 4,227 more rows]

## Sheet: Table S4
Table S4 Primer list of transcripts for real-time RT-PCR
[truncated: 22 more rows]

## Sheet: Table S5
Table S5 Summary of RNA-seq data.
[truncated: 21 more rows]
